# Supplementary material for: Silver or cerium-promoted free radical cascade difunctionalization of o-vinylanilides with sodium aryl- or alkylsulfinates
Source: Royal Society of Chemistry journal article supplement (doi:10.1039/c8ob02964d), 2018-12-27

## Supporting Information

### Silver or Cerium-Promoted Free Radical Cascade Difunctionalization of *o*-Vinylanilides with Sodium Aryl- or Alkylsulfonates

Jilai Wu,<sup>a</sup> Yuanyuan Zong,<sup>a</sup> Chunxia Zhao,<sup>a</sup> Qinqin Yan,<sup>a</sup> Lixian Sun,<sup>a</sup> Yiming Li,<sup>a</sup> Jincan Zhao,<sup>a</sup> Yaxin

Ge<sup>a</sup> and Zejiang Li<sup>\*,a,b,c</sup>

<sup>a</sup>College of Chemistry & Environmental Science, Hebei University, Baoding, Hebei, 071002, P. R. China; <sup>b</sup>Key Laboratory of Medicinal Chemistry and Molecular Diagnosis of the Ministry of Education, Hebei University, Baoding, Hebei, 071002, P. R. China; <sup>c</sup>Key Laboratory of Chemical Biology of Hebei Province, Hebei University, Baoding, Hebei, 071002, P. R. China.

E-mail: lizejiang898@126.com

|                                                              |       |
|--------------------------------------------------------------|-------|
| General Information.....                                     | 1     |
| Typical procedure for the reaction.....                      | 1     |
| The modification of the cascade reaction conditions.....     | 2     |
| Mechanistic study.....                                       | 3     |
| Physical data and references for the following products..... | 4-16  |
| Copies of the <sup>1</sup> H NMR, <sup>13</sup> C NMR.....   | 17-44 |

#### General Information

<sup>1</sup>H and <sup>13</sup>C NMR spectra were recorded on a Bruker advance III 600 spectrometer in CDCl<sub>3</sub> with TMS as internal standard. High-resolution mass spectral analysis (HRMS) data were measured on a Bruker Apex II. All products were identified by <sup>1</sup>H and <sup>13</sup>C NMR, HRMS. The starting materials were purchased from Energy, J&K Chemicals or Aldrich and used without further purification.

#### Typical procedure for the reaction

Conditions 1: A mixture of *o*-vinylanilides (1 equiv, 0.2 mmol), sodium salts (2 equiv, 0.4 mmol), AgNO<sub>3</sub> (3 equiv, 0.6 mmol) and EtOH (2 mL) was stirred at 80 °C in a sealed tube

(15 mL) under nitrogen for 11 h. When the reaction was finished, the mixture was condensed under vacuum and purified by column chromatography to afford the final product.

Conditions 2: A mixture of *o*-vinylanilides (1 equiv, 0.2 mmol), sodium salts (2.5 equiv, 0.5 mmol), CAN (1.5 equiv, 0.3 mmol) and CH<sub>3</sub>CN (2 mL) was stirred at 80 °C in a sealed tube (15 mL) under nitrogen for 11 h. When the reactions were finished, the final products were isolated via the same work-up procedure.

The modification of the cascade reaction conditions 1.

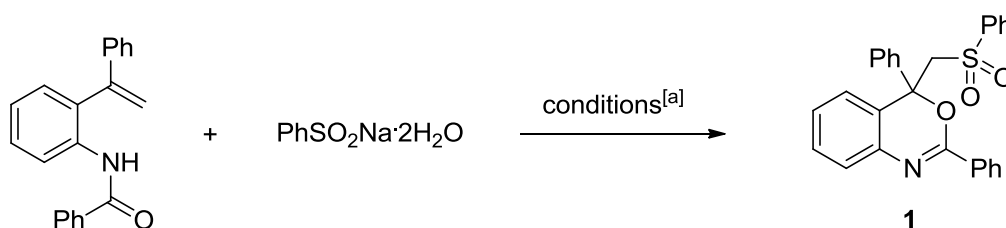

| Entry           | PhSO <sub>2</sub> Na·2H <sub>2</sub> O (equivalent) | Ag(I) (equivalent)      | Solvent (mL)             | Yield <sup>b</sup> (%) |
|-----------------|-----------------------------------------------------|-------------------------|--------------------------|------------------------|
| 1               | 2.0                                                 | AgNO <sub>3</sub> (0.5) | EtOH (2.0)               | Trace                  |
| 2               | 2.0                                                 | AgNO <sub>3</sub> (1.0) | EtOH (2.0)               | 47                     |
| 3               | 2.0                                                 | AgNO <sub>3</sub> (2.0) | EtOH (2.0)               | 63                     |
| 4               | 2.0                                                 | AgNO <sub>3</sub> (2.5) | EtOH (2.0)               | 71                     |
| 5               | 2.0                                                 | AgNO <sub>3</sub> (3.0) | EtOH (2.0)               | 95                     |
| 6               | 2.0                                                 | AgCl (3.0)              | EtOH (2.0)               | Trace                  |
| 7               | 2.0                                                 | AgOAc (3.0)             | EtOH (2.0)               | 23                     |
| 8               | 1.0                                                 | AgNO <sub>3</sub> (3.0) | EtOH (2.0)               | 58                     |
| 9               | 1.5                                                 | AgNO <sub>3</sub> (3.0) | EtOH (2.0)               | 65                     |
| 10              | 2.5                                                 | AgNO <sub>3</sub> (3.0) | EtOH (2.0)               | 93                     |
| 11 <sup>c</sup> | 2.0                                                 | AgNO <sub>3</sub> (3.0) | EtOH (2.0)               | 82                     |
| 12 <sup>d</sup> | 2.0                                                 | AgNO <sub>3</sub> (3.0) | EtOH (2.0)               | 66                     |
| 13 <sup>e</sup> | 2.0                                                 | AgNO <sub>3</sub> (3.0) | EtOH (2.0)               | Trace                  |
| 14 <sup>f</sup> | 2.0                                                 | AgNO <sub>3</sub> (3.0) | EtOH (2.0)               | 60                     |
| 15              | 2.0                                                 | AgNO <sub>3</sub> (3.0) | EtOH (0.5)               | 55                     |
| 16              | 2.0                                                 | AgNO <sub>3</sub> (3.0) | EtOH (1.0)               | 67                     |
| 17              | 2.0                                                 | AgNO <sub>3</sub> (3.0) | EtOH (3.0)               | 80                     |
| 18              | 2.0                                                 | AgNO <sub>3</sub> (3.0) | DCE (2.0)                | Trace                  |
| 19              | 2.0                                                 | AgNO <sub>3</sub> (3.0) | CH <sub>3</sub> CN (2.0) | 21                     |
| 20              | 2.0                                                 | AgNO <sub>3</sub> (3.0) | cyclohexane (2.0)        | 60                     |
| 21              | 2.0                                                 | AgNO <sub>3</sub> (3.0) | DMF (2.0)                | Trace                  |
| 22              | 2.0                                                 | AgNO <sub>3</sub> (3.0) | DMSO (2.0)               | Trace                  |
| 23 <sup>g</sup> | 2.0                                                 | AgNO <sub>3</sub> (3.0) | EtOH (2.0)               | 65                     |

<sup>a</sup>Reaction conditions 1: *N*-(2-(1-phenylvinyl)phenyl)benzamide (1 equiv, 0.2 mmol), PhSO<sub>2</sub>Na·2H<sub>2</sub>O (2 equiv, 0.4 mmol), AgNO<sub>3</sub> (3 equiv, 0.6 mmol), EtOH (2 mL), N<sub>2</sub>, 11h. <sup>b</sup>Isolated yields. <sup>c</sup>6 h. <sup>d</sup>18 h. <sup>e</sup>60 °C. <sup>f</sup>100 °C. <sup>g</sup>air.

The modification of the cascade reaction conditions 2.

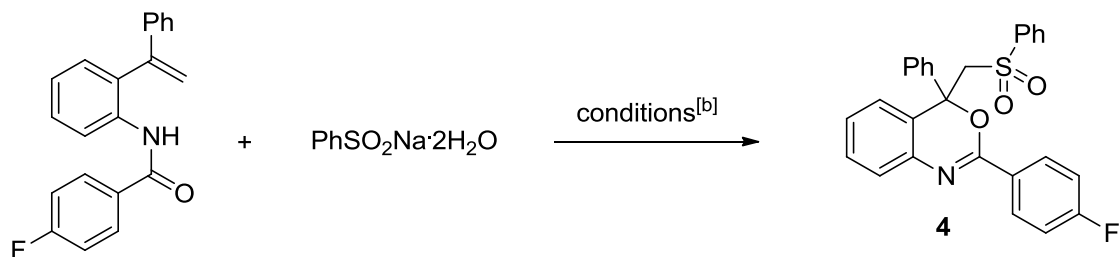

| Entry | PhSO <sub>2</sub> Na·2H <sub>2</sub> O (equivalent) | CAN (equivalent) | Solvent (mL)             | Yield (%) |
|-------|-----------------------------------------------------|------------------|--------------------------|-----------|
| 1     | 2.5                                                 | CAN (0.5)        | CH <sub>3</sub> CN (2.0) | 15        |
| 2     | 2.5                                                 | CAN (1.0)        | CH <sub>3</sub> CN (2.0) | 20        |
| 3     | 2.5                                                 | CAN (1.5)        | CH <sub>3</sub> CN (2.0) | 72        |
| 4     | 2.5                                                 | CAN (2.0)        | CH <sub>3</sub> CN (2.0) | 60        |
| 5     | 2.5                                                 | CAN (2.5)        | CH <sub>3</sub> CN (2.0) | 25        |

<sup>b</sup>Reaction conditions 2: *o*-vinylanilides (1 equiv, 0.2 mmol), sodium salts (2.5 equiv, 0.5 mmol), CAN (1.5 equiv, 0.3 mmol), CH<sub>3</sub>CN (2 mL), 80 °C, N<sub>2</sub>, 11 h, isolated yields.

### Mechanistic study

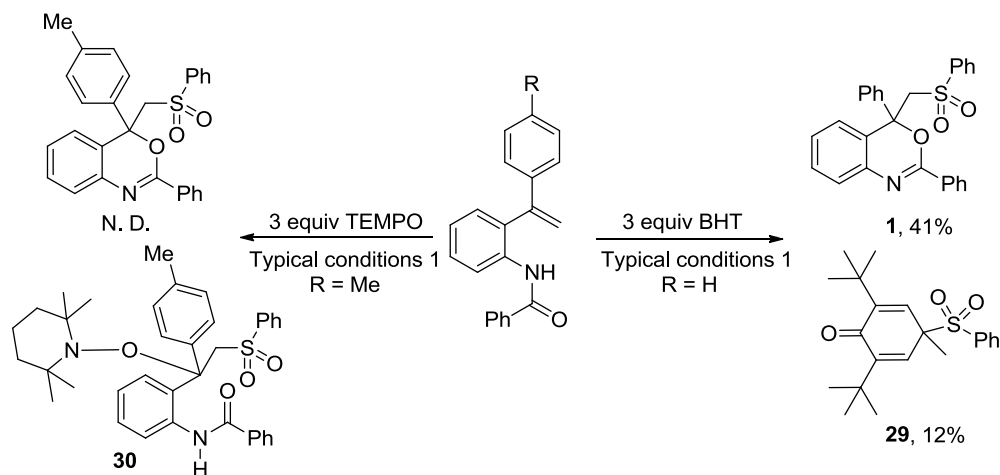

### HRMS of product 30

| Sample No. | Formula (M)                                                     | Ion Formula                       | Measured m/z | Calc m/z | Diff (ppm) |
|------------|-----------------------------------------------------------------|-----------------------------------|--------------|----------|------------|
| W-2254     | C <sub>37</sub> H <sub>42</sub> N <sub>2</sub> O <sub>4</sub> S | [M+NH <sub>4</sub> ] <sup>+</sup> | 628.3201     | 628.3204 | -0.48      |

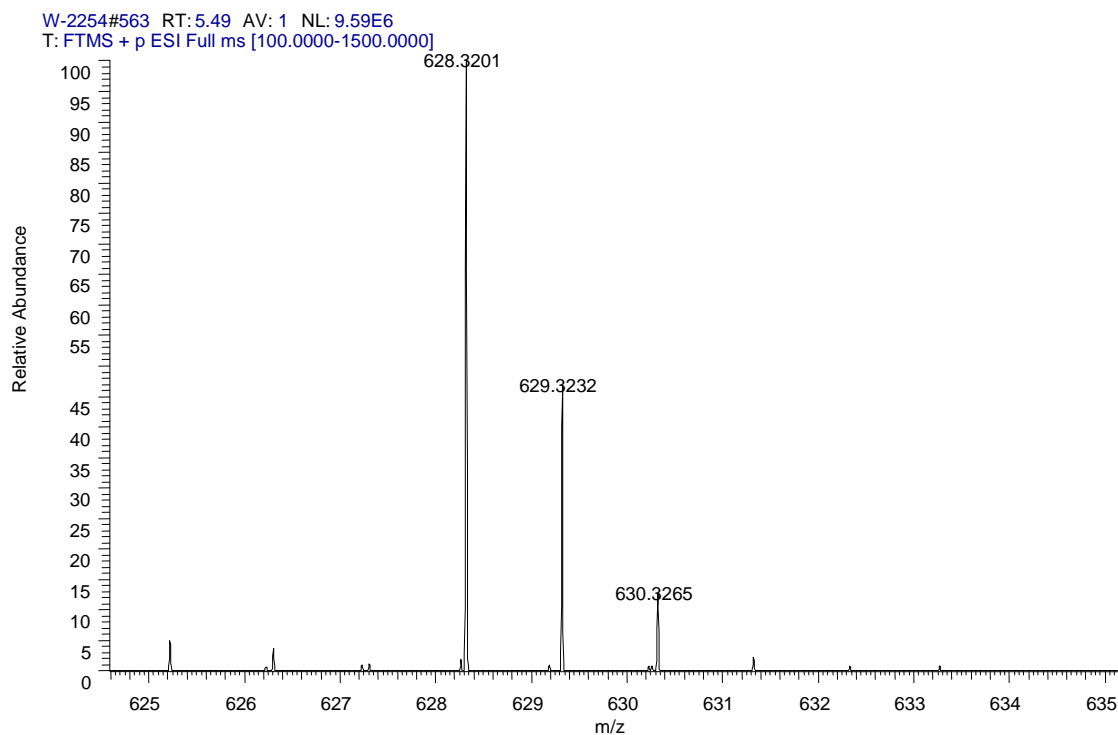

Physical data and references for the following products

**References:**

1. T. Liu, D. Zheng, Z. Li and J. Wu, *Adv. Synth. Catal.*, 2018, **360**, 865.
2. M. Chaitanya and P. Anbarasan, *Org. Lett.*, 2018, **20**, 1183.
3. J. Wang, R. Sang, X. Chong, Y. Zhao, W. Fan, Z. J. Li and J. C. Zhao, *Chem. Commun.*, 2017, **53**, 7961.

**Physical data for the following products:**

1. 2,4-diphenyl-4-enylsulfonylmethyl-4H-benzo[d][1,3]oxazine

A white solid after purification by flash column chromatography (petroleum ether/ethyl acetate = 10/1), mp 127-128 °C.

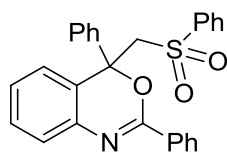

$^1\text{H NMR}$  (600 MHz,  $\text{CDCl}_3$ ):  $\delta$  7.85 (d,  $J = 7.8$  Hz, 2H), 7.60 (d,  $J = 7.8$  Hz, 2H), 7.40 (t,  $J = 7.2$  Hz, 1H), 7.33 – 7.27 (m, 4H), 7.24 – 7.18 (m, 5H), 7.15 (s, 5H), 4.23 (q,  $J = 15.6$  Hz,

2H).

**<sup>13</sup>C NMR (150 MHz, CDCl<sub>3</sub>):** δ 154.7, 141.7, 140.8, 138.8, 133.2, 131.7, 131.5, 129.6, 128.9, 128.7, 128.6, 128.2, 128.1, 127.9, 126.4, 126.0, 125.3, 124.1, 80.9, 64.6.

**HRMS (ESI, m/z):** Calculated for C<sub>27</sub>H<sub>22</sub>NO<sub>3</sub>S (M+H)<sup>+</sup> 440.1315, found 440.1307.

2. 4-phenyl-4-((phenylsulfonyl)methyl)-2-(p-tolyl)-4H-benzo[d][1,3]oxazine

A white solid after purification by flash column chromatography (petroleum ether/ethyl acetate = 10/1), mp 156-158 °C.

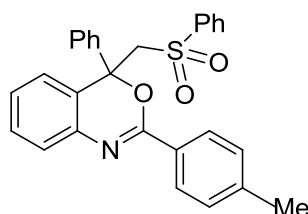

**<sup>1</sup>H NMR (600 MHz, CDCl<sub>3</sub>):** δ 7.81 (d, *J* = 7.2 Hz, 2H), 7.67 (d, *J* = 5.4 Hz, 2H), 7.41 (s, 1H), 7.35 (s, 1H), 7.30 – 7.26 (m, 4H), 7.22 (s, 6H), 7.18 (d, *J* = 7.2 Hz, 2H), 4.29 (q, *J* = 15.0 Hz, 2H), 2.41 (s, 3H).

**<sup>13</sup>C NMR (150 MHz, CDCl<sub>3</sub>):** δ 154.9, 142.0, 141.6, 140.8, 138.9, 133.2, 129.6, 128.9, 128.8, 128.6, 128.5, 128.2, 127.9, 126.1, 125.8, 125.2, 125.1, 124.2, 80.8, 64.6, 21.6.

**HRMS (ESI, m/z):** Calculated for C<sub>28</sub>H<sub>24</sub>NO<sub>3</sub>S (M+H)<sup>+</sup> 454.1471, found 454.1462.

3. 2-(4-methoxyphenyl)-4-phenyl-4-((phenylsulfonyl)methyl)-4H-benzo[d][1,3]oxazine

A white solid after purification by flash column chromatography (petroleum ether/ethyl acetate = 10/1), mp 199-200 °C.

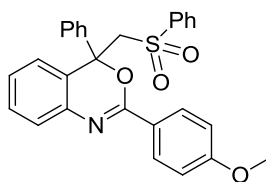

**<sup>1</sup>H NMR (600 MHz, CDCl<sub>3</sub>):** δ 7.90 – 7.88 (m, 2H), 7.68 – 7.66 (m, 2H), 7.41 (t, *J* = 7.2 Hz, 1H), 7.34 (td, *J* = 7.8, 1.2 Hz, 1H), 7.29 (t, *J* = 7.8 Hz, 3H), 7.26 – 7.24 (m, 1H), 7.23 – 7.20 (m, 6H), 6.89 – 6.87 (m, 2H), 4.29 (dd, *J* = 35.4, 15.6 Hz, 2H), 3.87 (s, 3H).

**<sup>13</sup>C NMR (150 MHz, CDCl<sub>3</sub>):** δ 162.5, 154.7, 141.6, 140.8, 139.0, 133.2, 129.8, 129.6, 128.9, 128.6, 128.5, 128.2, 125.9, 125.6, 125.3, 125.1, 124.1, 124.1, 113.6, 80.8, 64.5, 55.4.

**HRMS (ESI, m/z):** Calculated for C<sub>28</sub>H<sub>24</sub>NO<sub>4</sub>S (M+H)<sup>+</sup> 470.1421, found 470.1418.

4. 2-(4-fluorophenyl)-4-phenyl-4-((phenylsulfonyl)methyl)-4H-benzo[d][1,3]oxazine

A yellow solid after purification by flash column chromatography (petroleum ether/ethyl acetate = 10/1), mp 147-148 °C.

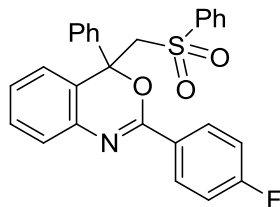

**<sup>1</sup>H NMR (600 MHz, CDCl<sub>3</sub>):** δ 7.81 – 7.79 (m, 2H), 7.67 (dd, J = 8.4, 1.2 Hz, 2H), 7.52 – 7.50 (m, 2H), 7.44 (t, J = 7.2 Hz, 1H), 7.36 (td, J = 7.8, 1.8 Hz, 1H), 7.31 (t, J = 7.8 Hz, 2H), 7.29 – 7.27 (m, 2H), 7.26 – 7.22 (m, 4H), 7.21 – 7.19 (m, 2H), 4.29 (q, J = 15.6 Hz, 2H).

**<sup>13</sup>C NMR (150 MHz, CDCl<sub>3</sub>):** δ 165.8, 164.1, 153.8, 141.5, 140.8, 138.6, 133.3, 130.2, 130.1, 129.7, 128.9, 128.7, 128.1, 127.8, 126.4, 125.9, 125.2, 125.1, 124.0, 115.4, 115.2, 81.0, 64.3.

**HRMS (ESI, m/z):** Calculated for C<sub>27</sub>H<sub>21</sub>FNO<sub>3</sub>S (M+H)<sup>+</sup> 458.1221, found 458.1214.

5. 2-(4-chlorophenyl)-4-phenyl-4-((phenylsulfonyl)methyl)-4H-benzo[d][1,3]oxazine

A white solid after purification by flash column chromatography (petroleum ether/ethyl acetate = 10/1).

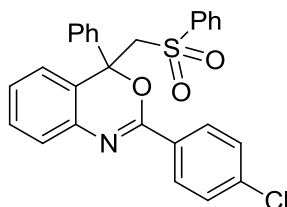

**<sup>1</sup>H NMR (600 MHz, CDCl<sub>3</sub>):** δ 7.88 – 7.87 (m, 2H), 7.68 – 7.67 (m, 2H), 7.43 (t, J = 7.2 Hz, 1H), 7.37 – 7.34 (m, 3H), 7.32 – 7.27 (m, 4H), 7.25 – 7.20 (m, 6H), 4.29 (q, J = 15.6 Hz, 2H).

**<sup>13</sup>C NMR (150 MHz, CDCl<sub>3</sub>):** δ 153.8, 141.5, 140.8, 138.5, 137.8, 133.3, 130.2, 129.7, 129.2, 129.0, 128.7, 128.5, 128.1, 126.6, 126.0, 125.2, 124.1, 81.1, 64.4.

**HRMS (ESI, m/z):** Calculated for C<sub>27</sub>H<sub>21</sub>ClNO<sub>3</sub>S (M+H)<sup>+</sup> 474.0925, found 474.0921.

6. 2-(4-bromophenyl)-4-phenyl-4-((phenylsulfonyl)methyl)-4H-benzo[d][1,3]oxazine

A white solid after purification by flash column chromatography (petroleum ether/ethyl acetate = 10/1), mp 133-135 °C.

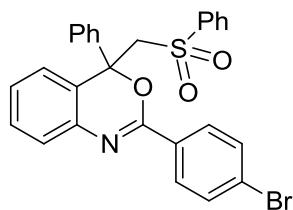

**$^1\text{H}$  NMR (600 MHz,  $\text{CDCl}_3$ ):**  $\delta$  7.80 (d,  $J = 8.4$  Hz, 2H), 7.67 (d,  $J = 7.8$  Hz, 2H), 7.51 (d,  $J = 8.4$  Hz, 2H), 7.43 (t,  $J = 7.2$  Hz, 1H), 7.37 – 7.34 (m, 1H), 7.30 (t,  $J = 7.8$  Hz, 2H), 7.28 – 7.25 (m, 3H), 7.23 (d,  $J = 7.2$  Hz, 3H), 7.21 – 7.19 (m, 2H), 4.28 (q,  $J = 15.6$  Hz, 2H).

**$^{13}\text{C}$  NMR (150 MHz,  $\text{CDCl}_3$ ):**  $\delta$  153.9, 141.4, 140.8, 138.4, 133.3, 131.4, 130.6, 129.7, 129.3, 129.0, 128.7, 128.1, 126.6, 126.4, 126.0, 125.2, 125.1, 124.1, 81.1, 64.3.

**HRMS (ESI,  $m/z$ ):** Calculated for  $\text{C}_{27}\text{H}_{21}\text{BrNO}_3\text{S}$  ( $\text{M}+\text{H}$ ) $^+$  518.0420, found 518.0419.

7. 2-(4-iodophenyl)-4-phenyl-4-((phenylsulfonyl)methyl)-4H-benzo[d][1,3]oxazine

A white solid after purification by flash column chromatography (petroleum ether/ethyl acetate = 10/1), mp 143-145  $^\circ\text{C}$ .

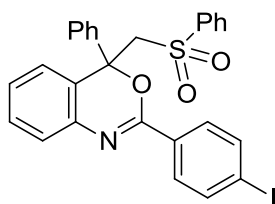

**$^1\text{H}$  NMR (600 MHz,  $\text{CDCl}_3$ ):**  $\delta$  7.73– 7.72 (m, 2H), 7.67 (dd,  $J = 8.4, 1.2$  Hz, 2H), 7.65 – 7.64 (m, 2H), 7.43 (t,  $J = 7.2$  Hz, 1H), 7.35 (td,  $J = 7.8, 1.8$  Hz, 1H), 7.30 (t,  $J = 7.8$  Hz, 2H), 7.28 – 7.26 (m, 2H), 7.26 – 7.24 (m, 1H), 7.24 – 7.22 (m, 3H), 7.20 – 7.19 (m, 2H), 4.28 (q,  $J = 15.6$  Hz, 2H).

**$^{13}\text{C}$  NMR (150 MHz,  $\text{CDCl}_3$ ):**  $\delta$  154.1, 141.4, 140.8, 138.4, 137.4, 133.3, 131.3, 129.7, 129.3, 129.0, 128.7, 128.1, 126.7, 126.0, 125.3, 125.2, 124.2, 98.8, 81.1, 64.4.

**HRMS (ESI,  $m/z$ ):** Calculated for  $\text{C}_{27}\text{H}_{21}\text{INO}_3\text{S}$  ( $\text{M}+\text{H}$ ) $^+$  566.0281, found 566.0273.

8. 2-([1,1'-biphenyl]-4-yl)-4-phenyl-4-((phenylsulfonyl)methyl)-4H-benzo[d][1,3]oxazine

A white solid after purification by flash column chromatography (petroleum ether/ethyl acetate = 10/1), mp 152-154  $^\circ\text{C}$ .

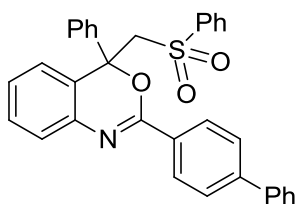

**<sup>1</sup>H NMR (600 MHz, CDCl<sub>3</sub>):** δ 8.00 (d, *J* = 8.4 Hz, 2H), 7.70 (d, *J* = 7.2 Hz, 2H), 7.65 (d, *J* = 7.2 Hz, 2H), 7.61 (d, *J* = 8.4 Hz, 2H), 7.48 (t, *J* = 7.2 Hz, 2H), 7.43 – 7.38 (m, 2H), 7.37 – 7.35 (m, 1H), 7.30 (t, *J* = 7.8 Hz, 4H), 7.26 – 7.22 (m, 6H), 4.32 (q, *J* = 15.0 Hz, 2H).

**<sup>13</sup>C NMR (150 MHz, CDCl<sub>3</sub>):** δ 154.6, 144.2, 141.7, 140.8, 140.2, 138.8, 133.3, 130.5, 129.6, 128.9, 128.9, 128.7, 128.6, 128.4, 128.2, 127.9, 127.2, 126.8, 126.4, 126.0, 125.3, 125.2, 124.2, 81.0, 77.2, 77.0, 76.8, 64.6.

**HRMS (ESI, *m/z*):** Calculated for C<sub>33</sub>H<sub>26</sub>NO<sub>3</sub>S (M+H)<sup>+</sup> 516.1628, found 516.1626.

9. 2-(naphthalen-1-yl)-4-phenyl-4-((phenylsulfonyl)methyl)-4H-benzo[d][1,3]oxazine

A white solid after purification by flash column chromatography (petroleum ether/ethyl acetate = 10/1).

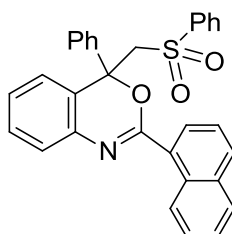

**<sup>1</sup>H NMR (600 MHz, CDCl<sub>3</sub>):** δ 8.21 (s, 1H), 8.10 (dd, *J* = 8.4, 1.8 Hz, 1H), 7.86 (t, *J* = 7.2 Hz, 2H), 7.83 (d, *J* = 8.4 Hz, 1H), 7.73 – 7.72 (m, 2H), 7.58 – 7.53 (m, 2H), 7.41 – 7.38 (m, 2H), 7.36 – 7.34 (m, 1H), 7.33 – 7.32 (m, 1H), 7.30 – 7.27 (m, 1H), 7.26 – 7.24 (m, 4H), 7.23 – 7.20 (m, 3H), 4.36 (q, *J* = 15.6 Hz, 2H).

**<sup>13</sup>C NMR (150 MHz, CDCl<sub>3</sub>):** δ 154.6, 141.7, 140.9, 138.8, 134.9, 133.2, 132.5, 129.7, 129.1, 128.9, 128.8, 128.7, 128.6, 128.2, 127.9, 127.7, 127.6, 126.5, 126.4, 126.0, 125.3, 125.2, 124.4, 124.3, 81.0, 64.4.

**HRMS (ESI, *m/z*):** Calculated for C<sub>31</sub>H<sub>24</sub>NO<sub>3</sub>S (M+H)<sup>+</sup> 490.1471, found 490.1465.

10. 4-phenyl-4-((phenylsulfonyl)methyl)-2-(thiophen-2-yl)-4H-benzo[d][1,3]oxazine

A yellow solid after purification by flash column chromatography (petroleum ether/ethyl acetate = 10/1), mp 150-152 °C.

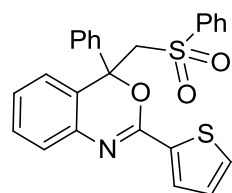

**<sup>1</sup>H NMR (600 MHz, CDCl<sub>3</sub>):** δ 7.69 – 7.67 (m, 2H), 7.46 (ddd, *J* = 7.8, 4.2, 1.2 Hz, 2H), 7.42 (t, *J* = 7.2 Hz, 1H), 7.37 – 7.34 (m, 1H), 7.32 – 7.30 (m, 3H), 7.26 – 7.22 (m, 7H), 7.04



(dd,  $J = 4.8, 4.2$  Hz, 1H), 4.27 (dd,  $J = 36.6, 15.6$  Hz, 2H).

**$^{13}\text{C}$  NMR (150 MHz,  $\text{CDCl}_3$ ):**  $\delta$  151.4, 141.5, 140.8, 138.7, 136.0, 133.2, 130.6, 130.2, 129.7, 128.9, 128.7, 128.2, 127.6, 126.2, 125.7, 125.5, 125.3, 123.9, 81.2, 64.6.

**HRMS (ESI,  $m/z$ ):** Calculated for  $\text{C}_{25}\text{H}_{20}\text{NO}_3\text{S}_2$  ( $\text{M}+\text{H}$ ) $^+$  446.0879, found 446.0873.

#### 11. 2-methyl-4-phenyl-4-((phenylsulfonyl)methyl)-4H-benzo[d][1,3]oxazine

A light yellow solid after purification by flash column chromatography (petroleum ether/ethyl acetate = 10/1).

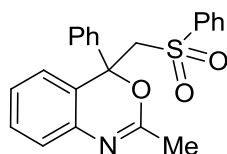

**$^1\text{H}$  NMR (600 MHz,  $\text{CDCl}_3$ ):**  $\delta$  7.68 (d,  $J = 7.8$  Hz, 2H), 7.56 (t,  $J = 7.8$  Hz, 1H), 7.42 (t,  $J = 7.8$  Hz, 2H), 7.31 – 7.26 (m, 4H), 7.23 – 7.22 (m, 2H), 7.11 (dd,  $J = 16.8, 8.4$  Hz, 2H), 7.04 – 7.03 (m, 1H), 4.14 (q,  $J = 15.6$  Hz, 2H), 1.97 (s, 3H).

**$^{13}\text{C}$  NMR (150 MHz,  $\text{CDCl}_3$ ):**  $\delta$  158.4, 141.7, 140.6, 138.1, 133.4, 129.6, 128.9, 128.6, 128.3, 126.2, 125.5, 125.4, 125.0, 123.4, 80.4, 64.3, 21.4.

**HRMS (ESI,  $m/z$ ):** Calculated for  $\text{C}_{22}\text{H}_{20}\text{NO}_3\text{S}$  ( $\text{M}+\text{H}$ ) $^+$  378.1158, found 378.1152.

#### 12. 2-(tert-butyl)-4-phenyl-4-((phenylsulfonyl)methyl)-4H-benzo[d][1,3]oxazine

A yellow solid after purification by flash column chromatography (petroleum ether/ethyl acetate = 10/1).

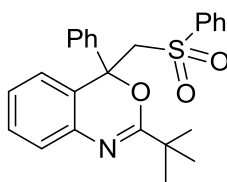

**$^1\text{H}$  NMR (600 MHz,  $\text{CDCl}_3$ ):**  $\delta$  7.61 (dd,  $J = 8.4, 1.2$  Hz, 2H), 7.52 – 7.50 (m, 1H), 7.37 (dd,  $J = 8.4, 7.8$  Hz, 2H), 7.27 – 7.25 (m, 4H), 7.18 – 7.16 (m, 3H), 6.99 (td,  $J = 7.8, 1.2$  Hz, 1H), 6.93 (d,  $J = 1.2$  Hz, 1H), 4.27 (d,  $J = 15.0$  Hz, 1H), 4.20 (d,  $J = 15.0$  Hz, 1H), 1.14 (s, 9H).

**$^{13}\text{C}$  NMR (150 MHz,  $\text{CDCl}_3$ ):**  $\delta$  166.1, 142.4, 140.8, 139.0, 133.3, 129.4, 129.0, 128.7, 128.4, 128.1, 126.0, 125.6, 125.6, 125.5, 122.3, 80.2, 64.8, 37.2, 27.6.

**HRMS (ESI,  $m/z$ ):** Calculated for  $\text{C}_{25}\text{H}_{26}\text{NO}_3\text{S}$  ( $\text{M}+\text{H}$ ) $^+$  420.1628, found 420.1622.

#### 13. 2-cyclohexyl-4-phenyl-4-((phenylsulfonyl)methyl)-4H-benzo[d][1,3]oxazine

A white solid after purification by flash column chromatography (petroleum ether/ethyl acetate = 10/1), mp

146-148 °C.

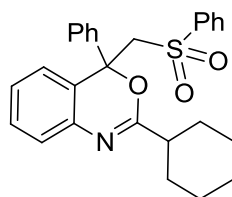

**<sup>1</sup>H NMR (600 MHz, CDCl<sub>3</sub>):** δ 7.64 (dd, *J* = 8.4, 1.2 Hz, 2H), 7.54 – 7.52 (m, 1H), 7.39 (t, *J* = 7.8 Hz, 2H), 7.30 – 7.26 (m, 3H), 7.24 (dd, *J* = 7.2, 1.2 Hz, 1H), 7.21 – 7.19 (m, 2H), 7.14 (dd, *J* = 7.8, 1.2 Hz, 1H), 7.02 (td, *J* = 7.8, 1.2 Hz, 1H), 6.96 (dd, *J* = 7.8, 1.2 Hz, 1H), 4.22 – 4.17 (m, 2H), 2.10 – 2.04 (m, 1H), 1.84 – 1.80 (m, 2H), 1.78 – 1.73 (m, 2H), 1.68 – 1.64 (m, 2H), 1.39 (qd, *J* = 12.0, 2.4 Hz, 1H), 1.32 (ddd, *J* = 24.0, 12.0, 3.0 Hz, 1H), 1.26 – 1.14 (m, 2H).

**<sup>13</sup>C NMR (150 MHz, CDCl<sub>3</sub>):** δ 163.8, 142.2, 140.8, 138.5, 133.2, 129.4, 128.9, 128.6, 128.5, 128.1, 125.8, 125.7, 125.5, 125.3, 123.1, 80.0, 64.5, 43.3, 29.5, 29.3, 25.8, 25.7, 25.6.

**HRMS (ESI, *m/z*):** Calculated for C<sub>27</sub>H<sub>28</sub>NO<sub>3</sub>S (M+H)<sup>+</sup> 446.1784, found 446.1779.

14. 2-phenyl-4-((phenylsulfonyl)methyl)-4-(*p*-tolyl)-4H-benzo[d][1,3]oxazine

A white solid after purification by flash column chromatography (petroleum ether/ethyl acetate = 10/1), mp 154-156 °C.

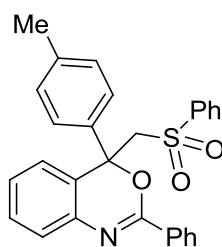

**<sup>1</sup>H NMR (600 MHz, CDCl<sub>3</sub>):** δ 7.91 (d, *J* = 6.6 Hz, 2H), 7.66 (d, *J* = 6.6 Hz, 2H), 7.46 (s, 1H), 7.37 – 7.34 (m, 4H), 7.27 (s, 4H), 7.23 (d, *J* = 6.6 Hz, 1H), 7.10 (d, *J* = 7.2 Hz, 2H), 7.02 (d, *J* = 7.2 Hz, 2H), 4.32 – 4.26 (m, 2H), 2.24 (s, 3H).

**<sup>13</sup>C NMR (150 MHz, CDCl<sub>3</sub>):** δ 154.7, 140.8, 138.8, 138.7, 138.5, 133.2, 131.7, 131.5, 129.5, 129.3, 128.8, 128.2, 128.1, 127.8, 126.3, 125.9, 125.2, 124.2, 80.8, 64.6, 20.9.

**HRMS (ESI, *m/z*):** Calculated for C<sub>28</sub>H<sub>24</sub>NO<sub>3</sub>S (M+H)<sup>+</sup> 454.1471, found 454.1462.

15. 4-(4-fluorophenyl)-2-phenyl-4-((phenylsulfonyl)methyl)-4H-benzo[d][1,3]oxazine

A white solid after purification by flash column chromatography (petroleum ether/ethyl acetate = 10/1).

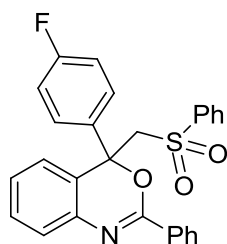

**$^1\text{H}$  NMR (600 MHz,  $\text{CDCl}_3$ ):**  $\delta$  7.94 – 7.92 (m, 2H), 7.68 – 7.66 (m, 2H), 7.48 (t,  $J = 7.8$  Hz, 1H), 7.41 (t,  $J = 7.2$  Hz, 1H), 7.39 – 7.35 (m, 3H), 7.29 (dd,  $J = 13.8, 6.0$  Hz, 4H), 7.25 – 7.24 (m, 1H), 7.23 – 7.20 (m, 2H), 6.92 – 6.89 (m, 2H), 4.28 (q,  $J = 15.6$  Hz, 2H).

**$^{13}\text{C}$  NMR (150 MHz,  $\text{CDCl}_3$ ):**  $\delta$  162.5 (d,  $J = 247.4$  Hz), 154.6, 140.7, 138.7, 137.3 (d,  $J = 3.2$  Hz), 133.3, 131.6, 131.5, 129.8, 128.9, 128.2, 128.1, 127.8, 127.4 (d,  $J = 8.4$  Hz), 126.5, 126.0, 125.0, 124.1, 115.6 (d,  $J = 21.8$  Hz), 80.5, 64.4.

**HRMS (ESI,  $m/z$ ):** Calculated for  $\text{C}_{27}\text{H}_{21}\text{FNO}_3\text{S}$  ( $\text{M}+\text{H}$ ) $^+$  458.1221, found 458.1215.

16. 4-(4-chlorophenyl)-2-phenyl-4-((phenylsulfonyl)methyl)-4H-benzo[d][1,3]oxazine

A white solid after purification by flash column chromatography (petroleum ether/ethyl acetate = 10/1), mp 156-157  $^\circ\text{C}$ .

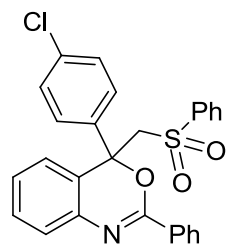

**$^1\text{H}$  NMR (600 MHz,  $\text{CDCl}_3$ ):**  $\delta$  7.95 – 7.94 (m, 2H), 7.67 (dd,  $J = 8.4, 1.2$  Hz, 2H), 7.48 (d,  $J = 7.8$  Hz, 1H), 7.42 – 7.35 (m, 4H), 7.30 – 7.27 (m, 3H), 7.26 – 7.22 (m, 2H), 7.20 – 7.16 (m, 4H), 4.27 (q,  $J = 15.6$  Hz, 2H).

**$^{13}\text{C}$  NMR (150 MHz,  $\text{CDCl}_3$ ):**  $\delta$  154.6, 140.7, 139.9, 138.6, 134.7, 133.3, 131.7, 131.4, 129.8, 129.0, 128.8, 128.2, 128.1, 127.8, 126.9, 126.6, 126.1, 124.9, 124.0, 80.5, 64.2.

**HRMS (ESI,  $m/z$ ):** Calculated for  $\text{C}_{27}\text{H}_{21}\text{ClNO}_3\text{S}$  ( $\text{M}+\text{H}$ ) $^+$  474.0925, found 474.0922.

18. 4-methyl-2-phenyl-4-((phenylsulfonyl)methyl)-4H-benzo[d][1,3]oxazine

A white solid after purification by flash column chromatography (petroleum ether/ethyl acetate = 10/1), mp 108-110  $^\circ\text{C}$ .

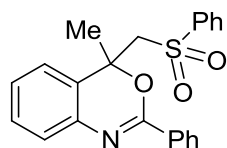

**<sup>1</sup>H NMR (600 MHz, CDCl<sub>3</sub>):** δ 8.06 – 8.04 (m, 2H), 7.72 (dd, *J* = 8.4, 0.6 Hz, 2H), 7.50 – 7.45 (m, 2H), 7.41 (t, *J* = 7.8 Hz, 2H), 7.35 (t, *J* = 8.4 Hz, 2H), 7.31 – 7.28 (m, 1H), 7.25 (d, *J* = 6.0 Hz, 1H), 7.18 – 7.15 (m, 1H), 7.13 (dd, *J* = 7.8, 1.8 Hz, 1H), 3.83 (d, *J* = 15.0 Hz, 1H), 3.63 (d, *J* = 14.4 Hz, 1H), 2.09 (s, 3H).

**<sup>13</sup>C NMR (150 MHz, CDCl<sub>3</sub>):** δ 155.6, 140.6, 138.3, 133.4, 132.0, 131.5, 129.5, 129.1, 128.2, 128.1, 127.7, 127.0, 125.6, 123.2, 77.9, 64.0, 27.0.

**HRMS (ESI, m/z):** Calculated for C<sub>22</sub>H<sub>20</sub>NO<sub>3</sub>S (M+H)<sup>+</sup> 378.1158, found 378.1153.

19. 6-fluoro-2,4-diphenyl-4-((phenylsulfonyl)methyl)-4H-benzo[d][1,3]oxazine

A white solid after purification by flash column chromatography (petroleum ether/ethyl acetate = 10/1).

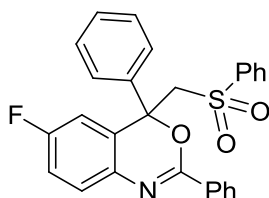

**<sup>1</sup>H NMR (600 MHz, CDCl<sub>3</sub>):** δ 7.93 – 7.92 (m, 2H), 7.70 – 7.69 (m, 2H), 7.48 (t, *J* = 7.2 Hz, 1H), 7.42 (t, *J* = 7.8 Hz, 1H), 7.37 (t, *J* = 7.8 Hz, 2H), 7.31 – 7.29 (m, 2H), 7.28 – 7.26 (m, 1H), 7.25 – 7.22 (m, 5H), 7.04 (td, *J* = 8.4, 3.0 Hz, 1H), 6.98 (dd, *J* = 8.4, 2.4 Hz, 1H), 4.28 – 4.23 (m, 2H).

**<sup>13</sup>C NMR (150 MHz, CDCl<sub>3</sub>):** δ 160.7 (d, *J* = 245.2 Hz), 154.1, 141.2, 140.7, 135.1, 133.4, 131.6, 131.4, 129.0, 128.8, 128.2, 128.1, 127.8, 127.6 (d, *J* = 8.2 Hz), 125.8 (d, *J* = 7.2 Hz), 125.1, 116.4 (d, *J* = 21.9 Hz), 112.4 (d, *J* = 24.6 Hz), 80.6, 64.3.

**HRMS (ESI, m/z):** Calculated for C<sub>27</sub>H<sub>21</sub>FNO<sub>3</sub>S (M+H)<sup>+</sup> 458.1221, found 458.1216.

20. 6-bromo-2,4-diphenyl-4-((phenylsulfonyl)methyl)-4H-benzo[d][1,3]oxazine

A light yellow solid after purification by flash column chromatography (petroleum ether/ethyl acetate = 10/1), mp 127-128 °C.

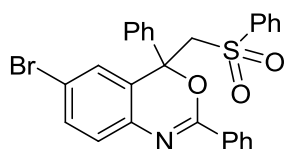

**<sup>1</sup>H NMR (600 MHz, CDCl<sub>3</sub>):** δ 7.98 – 7.96 (m, 2H), 7.69 – 7.68 (m, 2H), 7.51 – 7.47 (m, 1H), 7.44 – 7.42 (m, 2H), 7.39 (t, *J* = 7.8 Hz, 2H), 7.31 (t, *J* = 7.8 Hz, 2H), 7.28 (d, *J* = 1.8 Hz, 1H), 7.27 – 7.24 (m, 3H), 7.22 (dd, *J* = 8.4, 2.4 Hz, 2H), 7.16 (d, *J* = 8.4 Hz, 1H), 4.26 (s, 2H).

**<sup>13</sup>C NMR (150 MHz, CDCl<sub>3</sub>):** δ 155.2, 141.2, 140.6, 137.9, 133.5, 132.7, 131.8, 131.4, 130.1, 129.0, 128.9, 128.9, 128.4, 128.3, 128.1, 128.1, 128.0, 127.5, 125.9, 125.2, 119.3, 80.5, 64.2.

**HRMS (ESI, m/z):** Calculated for C<sub>27</sub>H<sub>21</sub>BrNO<sub>3</sub>S (M+H)<sup>+</sup> 518.0420, found 518.0416.

21. 8-bromo-2,4-diphenyl-4-((phenylsulfonyl)methyl)-4H-benzo[d][1,3]oxazine.

A light yellow solid after purification by flash column chromatography (petroleum ether/ethyl acetate = 10/1).

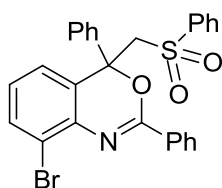

**<sup>1</sup>H NMR (600 MHz, CDCl<sub>3</sub>):** δ 7.99 – 7.97 (m, 2H), 7.68 – 7.67 (m, 2H), 7.61 (dd, *J* = 8.4, 1.2 Hz, 1H), 7.48 (t, *J* = 7.8 Hz, 1H), 7.41 (t, *J* = 7.2 Hz, 1H), 7.37 (t, *J* = 7.8 Hz, 2H), 7.30 – 7.24 (m, 3H), 7.20 (d, *J* = 9.0 Hz, 5H), 7.08 (t, *J* = 7.8 Hz, 1H), 4.29 (q, *J* = 15.6 Hz, 2H).

**<sup>13</sup>C NMR (150 MHz, CDCl<sub>3</sub>):** δ 155.6, 141.0, 140.6, 137.0, 133.5, 133.4, 132.0, 131.2, 128.9, 128.8, 128.2, 128.3, 128.2, 128.1, 126.8, 126.0, 125.2, 124.6, 121.7, 81.0, 64.3

**HRMS (ESI, m/z):** Calculated for C<sub>27</sub>H<sub>21</sub>BrNO<sub>3</sub>S (M+H)<sup>+</sup> 518.0420, found 518.0420.

22. 6-iodo-2,4-diphenyl-4-((phenylsulfonyl)methyl)-4H-benzo[d][1,3]oxazine

A yellow solid after purification by flash column chromatography (petroleum ether/ethyl acetate = 10/1), mp 126-128 °C.

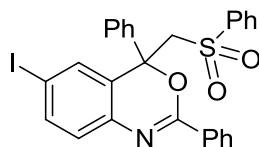

**<sup>1</sup>H NMR (600 MHz, CDCl<sub>3</sub>):** δ 7.93 (d, *J* = 7.2 Hz, 2H), 7.67 (d, *J* = 7.2 Hz, 2H), 7.46 (t, *J* = 7.2 Hz, 1H), 7.37 – 7.33 (m, 4H), 7.29 (d, *J* = 2.4 Hz, 2H), 7.26 (d, *J* = 7.8 Hz, 2H), 7.24 – 7.20 (m, 5H), 4.31 (q, *J* = 15.6 Hz, 2H).

**<sup>13</sup>C NMR (150 MHz, CDCl<sub>3</sub>):** δ 154.6, 141.6, 140.8, 138.7, 133.2, 131.6, 131.5, 129.6, 128.8, 128.6, 128.6, 128.1, 127.8, 126.3, 125.9, 125.2, 124.1, 80.9, 64.5.

**HRMS (ESI, m/z):** Calculated for C<sub>27</sub>H<sub>19</sub>INO<sub>3</sub>S [M-H]<sup>-</sup> 564.0136, found 564.0145.

23. 8-bromo-6-fluoro-2,4-diphenyl-4-((phenylsulfonyl)methyl)-4H-benzo[d][1,3]oxazine

A yellow solid after purification by flash column chromatography (petroleum ether/ethyl acetate = 10/1), mp 172-174 °C.

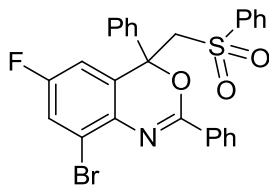

**<sup>1</sup>H NMR (600 MHz, CDCl<sub>3</sub>):** δ 7.98 (d, *J* = 7.2 Hz, 2H), 7.71 (d, *J* = 7.2 Hz, 2H), 7.50 (t, *J* = 7.2 Hz, 1H), 7.45 (t, *J* = 7.8 Hz, 1H), 7.38 (t, *J* = 7.8 Hz, 2H), 7.35 (dd, *J* = 7.8, 2.4 Hz, 1H), 7.32 (t, *J* = 7.8 Hz, 2H), 7.25 (dd, *J* = 5.4, 1.8 Hz, 3H), 7.22 (dd, *J* = 7.8, 3.0 Hz, 2H), 6.99 (dd, *J* = 7.8, 2.4 Hz, 1H), 4.28 – 4.22 (m, 2H).

**<sup>13</sup>C NMR (150 MHz, CDCl<sub>3</sub>):** δ 159.7 (d, *J* = 249.2 Hz), 155.0, 140.6 (d, *J* = 7.6 Hz), 133.7 (d, *J* = 3.2 Hz), 133.5, 132.0, 131.0, 129.1, 129.0, 128.9, 128.2, 128.2, 128.1, 127.0 (d, *J* = 7.6 Hz), 125.1, 122.2, 122.1, 120.7 (d, *J* = 24.8 Hz), 112.0 (d, *J* = 24.3 Hz), 80.8, 64.0.

**HRMS (ESI, *m/z*):** Calculated for C<sub>27</sub>H<sub>20</sub>FBrNO<sub>3</sub>S (M+H)<sup>+</sup> 536.0326, found 536.0327.

24. 8-bromo-6-chloro-2,4-diphenyl-4-((phenylsulfonyl)methyl)-4H-benzo[d][1,3]oxazine

A yellow solid after purification by flash column chromatography (petroleum ether/ethyl acetate = 10/1), mp 167-168 °C.

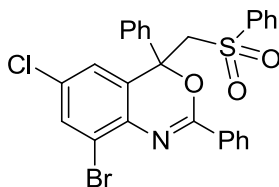

**<sup>1</sup>H NMR (600 MHz, CDCl<sub>3</sub>):** δ 8.01 (d, *J* = 7.8 Hz, 2H), 7.70 (d, *J* = 7.2 Hz, 2H), 7.58 (d, *J* = 2.4 Hz, 1H), 7.51 (t, *J* = 7.2 Hz, 1H), 7.46 (t, *J* = 7.2 Hz, 1H), 7.40 (t, *J* = 7.8 Hz, 2H), 7.33 (t, *J* = 7.8 Hz, 2H), 7.27 – 7.25 (m, 3H), 7.22 – 7.21 (m, 2H), 7.14 (d, *J* = 1.8 Hz, 1H), 4.28 – 4.22 (m, 2H).

**<sup>13</sup>C NMR (150 MHz, CDCl<sub>3</sub>):** δ 155.9, 140.6, 140.5, 135.9, 133.6, 133.1, 132.2, 131.5, 131.0, 129.1, 129.0, 129.0, 128.4, 128.3, 128.1, 126.8, 125.1, 124.6, 122.2, 80.8, 64.0.

**HRMS (ESI, *m/z*):** Calculated for C<sub>27</sub>H<sub>20</sub>ClBrNO<sub>3</sub>S (M+H)<sup>+</sup> 552.0030, found 552.0029.

25. 8-bromo-6-methyl-2,4-diphenyl-4-((phenylsulfonyl)methyl)-4H-benzo[d][1,3]oxazine

A yellow solid after purification by flash column chromatography (petroleum ether/ethyl acetate = 10/1), mp 168-169 °C.

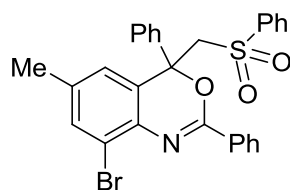

**<sup>1</sup>H NMR (600 MHz, CDCl<sub>3</sub>):** δ 7.97 (d, *J* = 7.2 Hz, 2H), 7.67 (d, *J* = 7.8 Hz, 2H), 7.47 (t, *J* = 7.2 Hz, 1H), 7.42 – 7.39 (m, 2H), 7.36 (t, *J* = 7.8 Hz, 2H), 7.28 (t, *J* = 7.8 Hz, 2H), 7.21 (s, 5H), 6.98 (s, 1H), 4.28 (q, *J* = 15.6 Hz, 1H), 2.31 (s, 3H).

**<sup>13</sup>C NMR (150 MHz, CDCl<sub>3</sub>):** δ 154.9, 141.2, 140.6, 137.1, 134.6, 133.9, 133.3, 131.7, 131.3, 128.8, 128.7, 128.7, 128.1, 128.1, 128.1, 125.5, 125.2, 125.1, 121.4, 80.9, 64.2, 21.0.

**HRMS (ESI, *m/z*):** Calculated for C<sub>28</sub>H<sub>23</sub>BrNO<sub>3</sub>S (M+H)<sup>+</sup> 532.0577, found 532.0576.

26. 2,4-diphenyl-4-(tosylmethyl)-4H-benzo[d][1,3]oxazine

A white solid after purification by flash column chromatography (petroleum ether/ethyl acetate = 10/1).

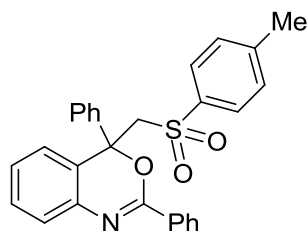

**<sup>1</sup>H NMR (600 MHz, CDCl<sub>3</sub>):** δ 7.90 (dd, *J* = 8.4, 1.2 Hz, 2H), 7.53 (d, *J* = 7.8 Hz, 2H), 7.48 – 7.46 (m, 1H), 7.38 – 7.35 (m, 3H), 7.31 (ddd, *J* = 17.4, 7.8, 1.2 Hz, 3H), 7.25 (dd, *J* = 8.4, 1.8 Hz, 1H), 7.23 – 7.22 (m, 4H), 7.04 (d, *J* = 7.8 Hz, 2H), 4.27 (q, *J* = 15.0 Hz, 2H), 2.21 (s, 3H).

**<sup>13</sup>C NMR (150 MHz, CDCl<sub>3</sub>):** δ 154.6, 144.3, 141.9, 138.7, 137.8, 131.7, 131.4, 129.5, 129.5, 128.7, 128.6, 128.2, 128.0, 127.8, 126.3, 125.9, 125.5, 125.2, 123.9, 80.9, 64.6, 21.4.

**HRMS (ESI, *m/z*):** Calculated for C<sub>28</sub>H<sub>24</sub>NO<sub>3</sub>S (M+H)<sup>+</sup> 454.1471, found 454.1465.

27. 4-(((4-chlorophenyl)sulfonyl)methyl)-2,4-diphenyl-4H-benzo[d][1,3]oxazine

A white solid after purification by flash column chromatography (petroleum ether/ethyl acetate = 10/1).

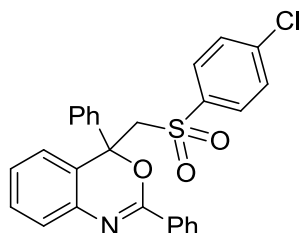

**<sup>1</sup>H NMR (600 MHz, CDCl<sub>3</sub>):** δ 7.90 (dd, *J* = 8.4, 1.2 Hz, 2H), 7.57 – 7.56 (m, 2H), 7.51 – 7.48 (m, 1H), 7.41 – 7.39 (m, 2H), 7.37 (dd, *J* = 7.2, 0.6 Hz, 1H), 7.30 – 7.28 (m, 2H), 7.26 –

7.24 (m, 1H), 7.24 – 7.22 (m, 5H), 7.20 – 7.18 (m, 2H), 4.30 (dd,  $J = 36.6, 15.6$  Hz, 2H).

**$^{13}\text{C}$  NMR (150 MHz,  $\text{CDCl}_3$ ):**  $\delta$  154.5, 141.6, 140.2, 139.0, 138.7, 131.7, 131.4, 129.7, 129.6, 129.2, 128.7, 128.6, 128.2, 127.7, 126.4, 126.0, 125.3, 125.2, 123.8, 80.8 64.7.

**HRMS (ESI,  $m/z$ ):** Calculated for  $\text{C}_{27}\text{H}_{21}\text{ClNO}_3\text{S}$  ( $\text{M}+\text{H}$ )<sup>+</sup> 474.0925, found 474.0921.

28. 4-((methylsulfonyl)methyl)-2,4-diphenyl-4H-benzo[d][1,3]oxazine

A white solid after purification by flash column chromatography (petroleum ether/ethyl acetate = 10/1), mp 186-188 °C.

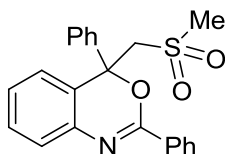

**$^1\text{H}$  NMR (600 MHz,  $\text{CDCl}_3$ ):**  $\delta$  8.27 – 8.26 (m, 2H), 7.56 – 7.53 (m, 1H), 7.49 (t,  $J = 7.8$  Hz, 2H), 7.42 (td,  $J = 7.8, 1.2$  Hz, 1H), 7.38 – 7.36 (m, 4H), 7.34 – 7.28 (m, 4H), 4.19 – 4.13 (m, 2H), 2.80 (s, 3H).

**$^{13}\text{C}$  NMR (150 MHz,  $\text{CDCl}_3$ ):**  $\delta$  154.7, 141.0, 138.7, 131.9, 131.7, 129.9, 128.8, 128.8, 128.6, 128.0, 126.8, 126.2, 125.5, 125.0, 124.8, 80.9, 63.5, 43.9.

**HRMS (ESI,  $m/z$ ):** Calculated for  $\text{C}_{22}\text{H}_{20}\text{NO}_3\text{S}$  ( $\text{M}+\text{H}$ )<sup>+</sup> 378.1158, found 378.1153.

29. 2,6-di-tert-butyl-4-methyl-4-(phenylsulfonyl)cyclohexa-2,5-dienone

A white solid after purification by flash column chromatography (petroleum ether/ethyl acetate = 10/1), mp 150-152 °C.

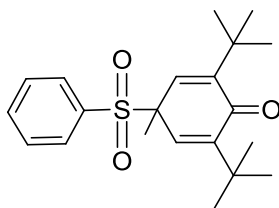

**$^1\text{H}$  NMR (600 MHz,  $\text{CDCl}_3$ ):**  $\delta$  7.64 (dd,  $J = 8.4, 1.2$  Hz, 2H), 7.57 (t,  $J = 7.2$  Hz, 1H), 7.40 (t,  $J = 7.8$  Hz, 2H), 6.65 (s, 2H), 1.83 (s, 3H), 1.10 (s, 18H).

**$^{13}\text{C}$  NMR (150 MHz,  $\text{CDCl}_3$ ):**  $\delta$  183.6, 151.4, 135.5, 134.1, 133.6, 130.3, 128.2, 65.8, 35.19, 29.0, 18.4.

**HRMS (ESI,  $m/z$ ):** Calculated for  $\text{C}_{21}\text{H}_{27}\text{O}_3\text{S}$  ( $\text{M}-\text{H}$ )<sup>-</sup> 359.1686, found 359.1692.



# Copies of the $^1\text{H}$ NMR, $^{13}\text{C}$ NMR

## 1- $^1\text{H}$ NMR

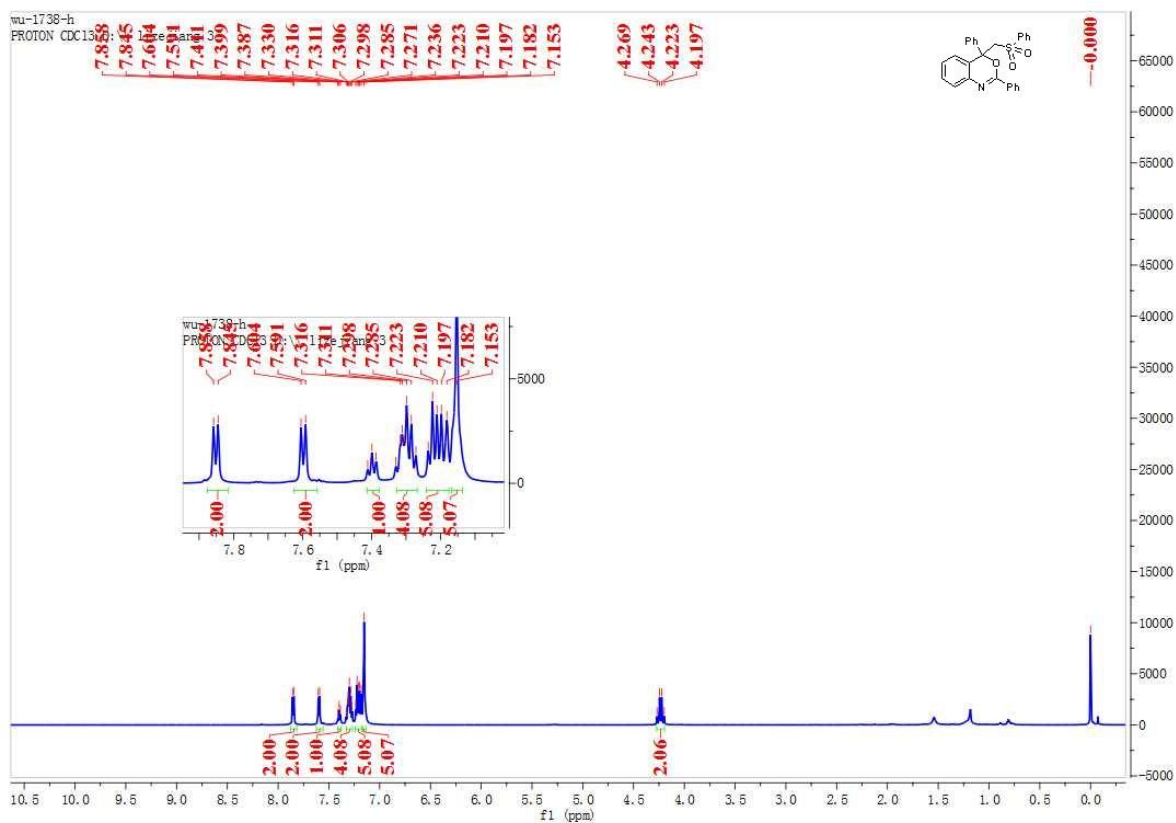

## 1- $^{13}\text{C}$ NMR

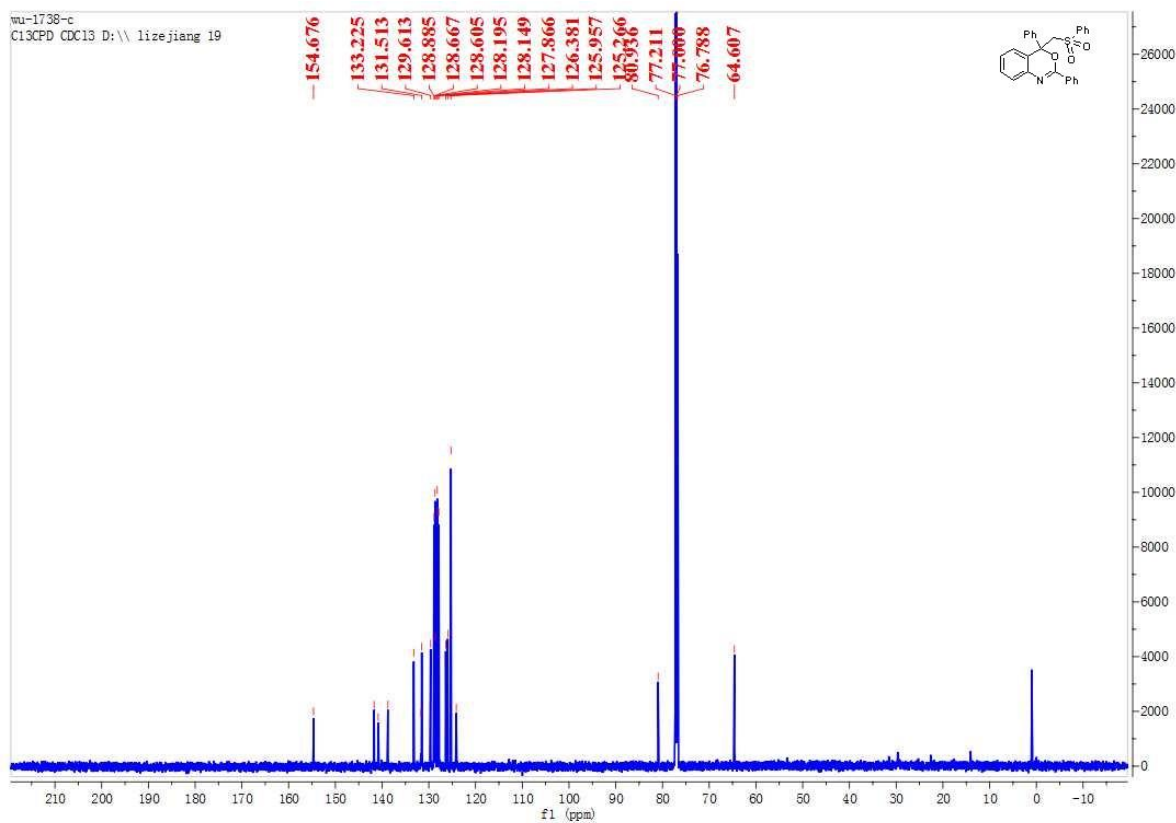

## 2-<sup>1</sup>H NMR

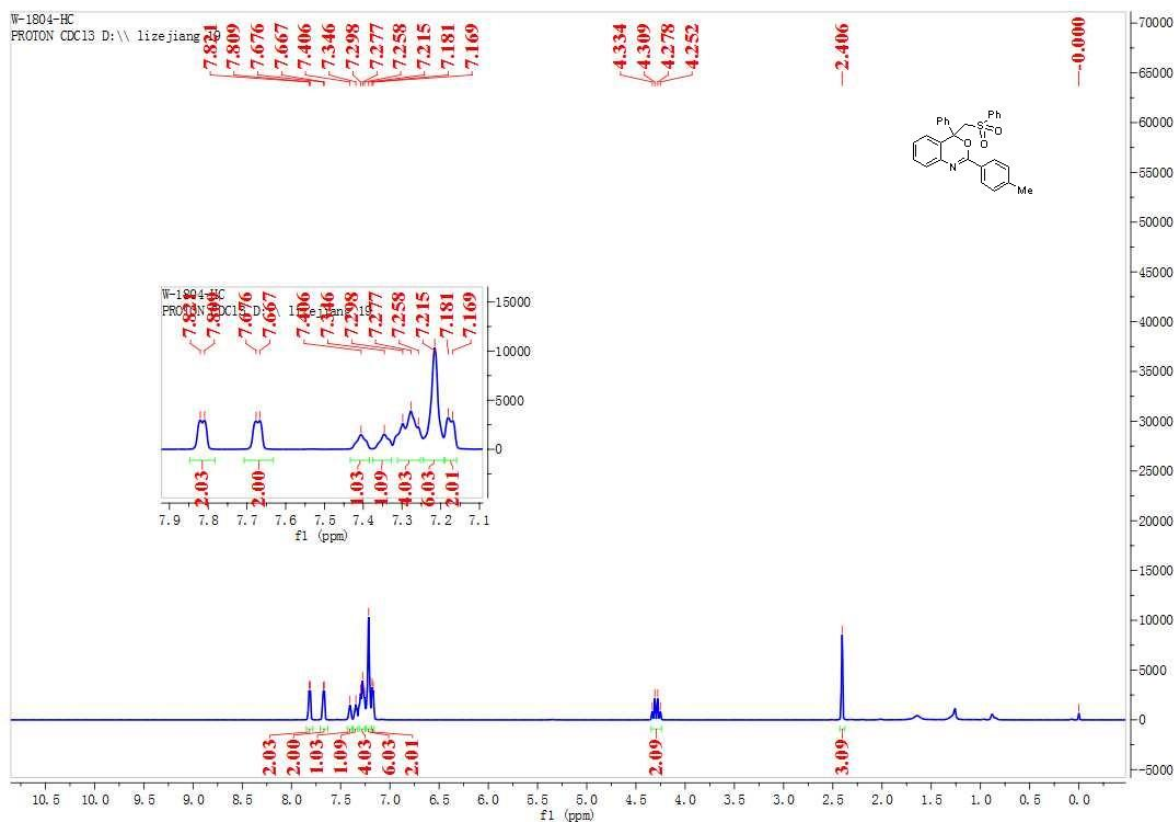

## 2-<sup>13</sup>C NMR

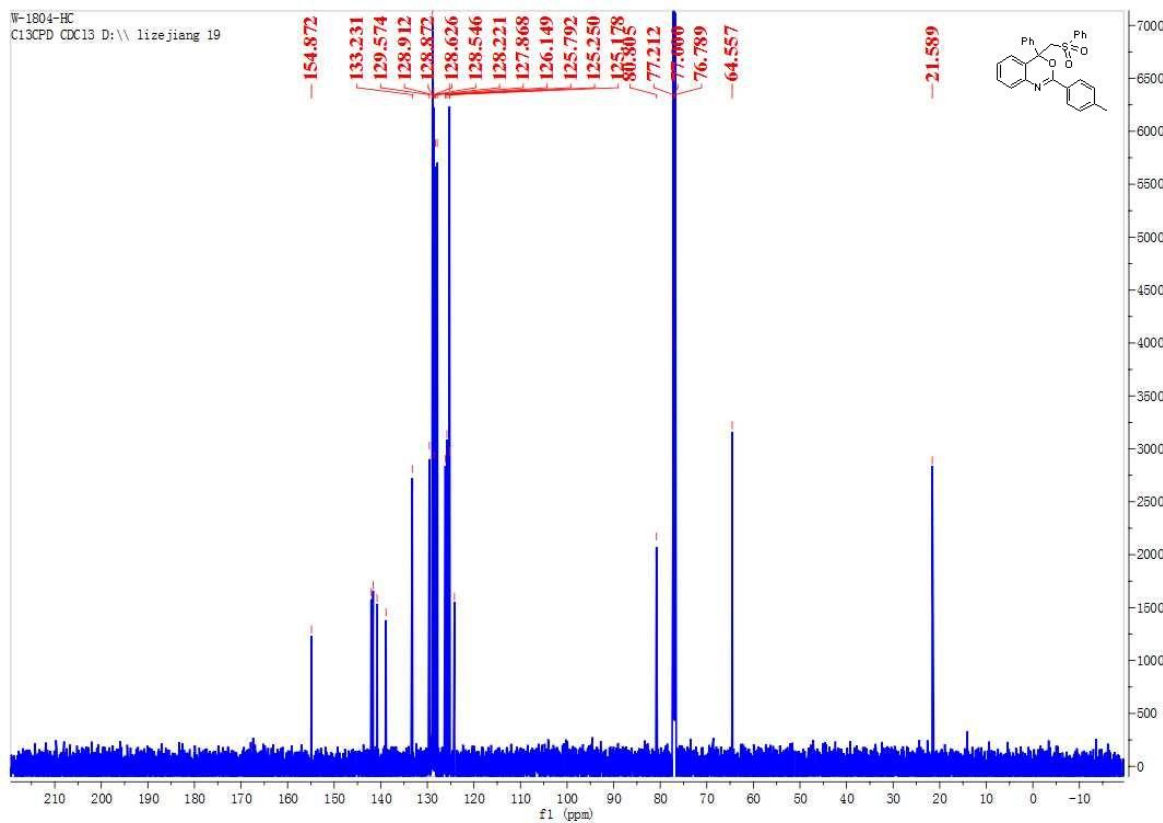

### 3-<sup>1</sup>H NMR

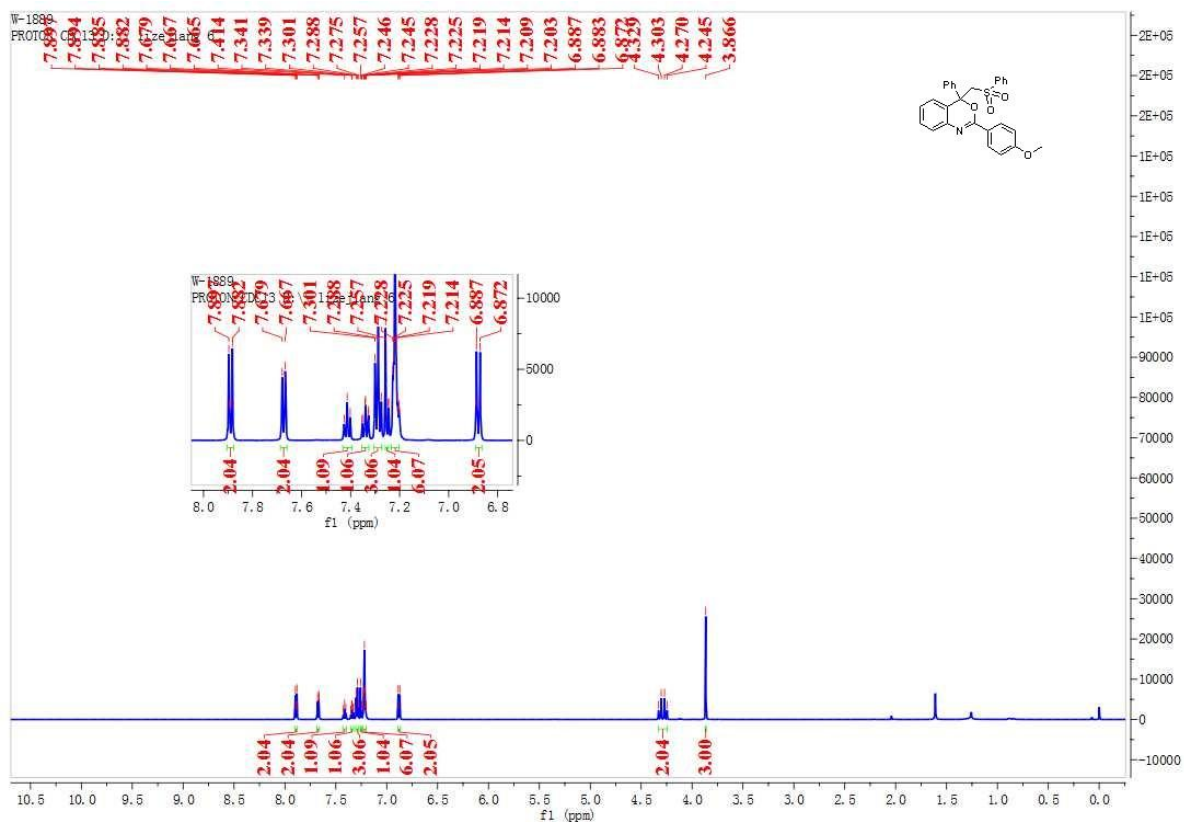

### 3-<sup>13</sup>C NMR

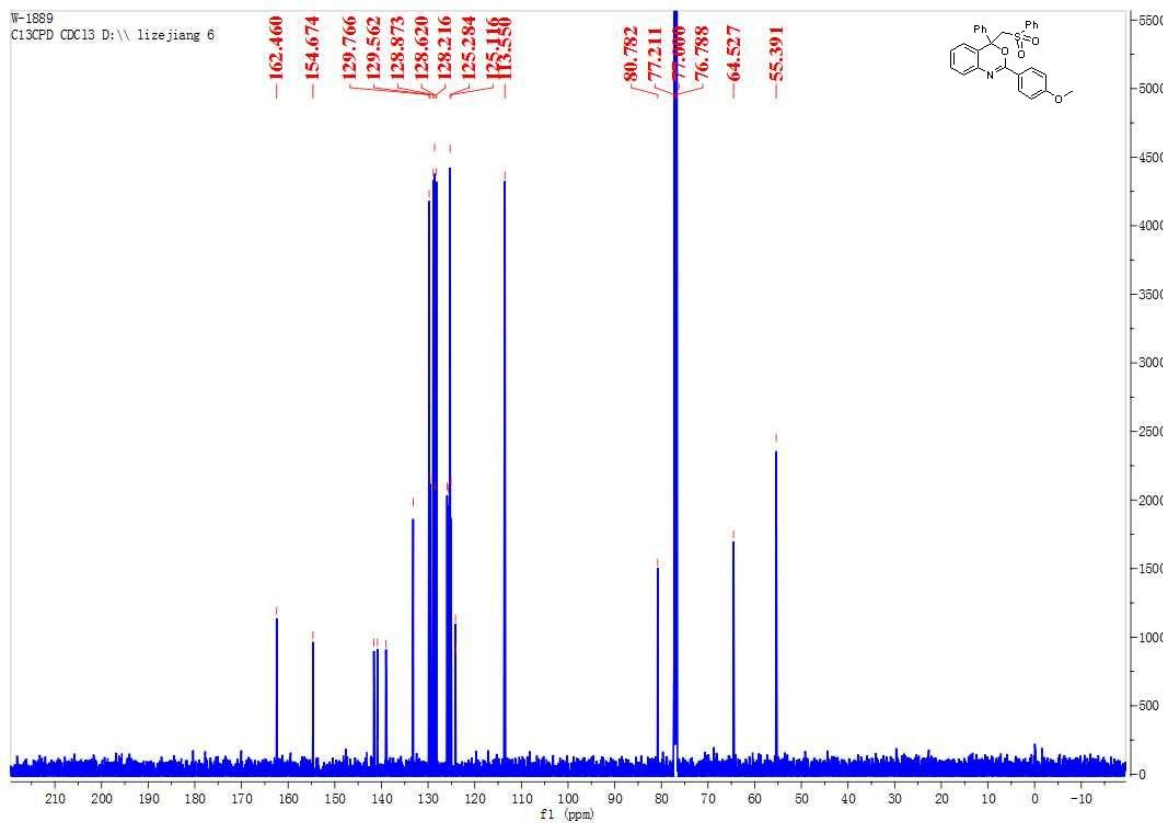

#### 4-<sup>1</sup>H NMR

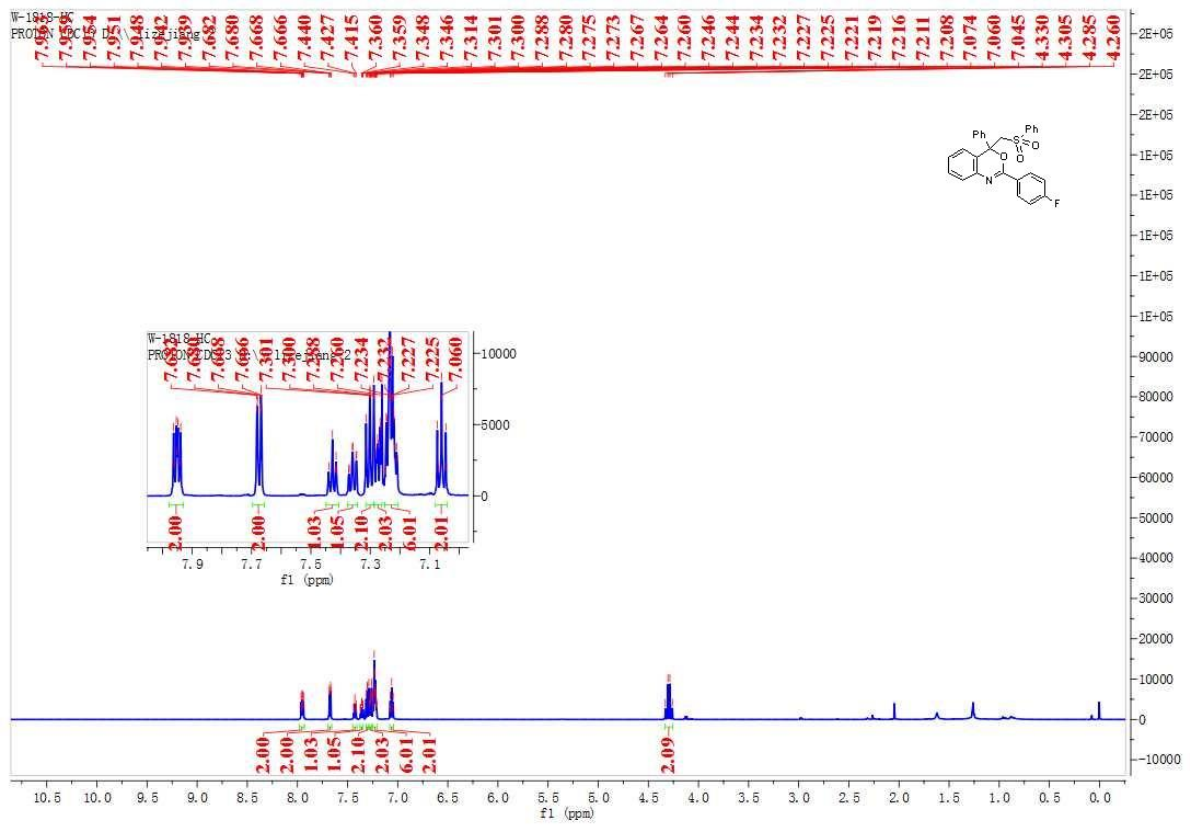

#### 4-<sup>13</sup>C NMR

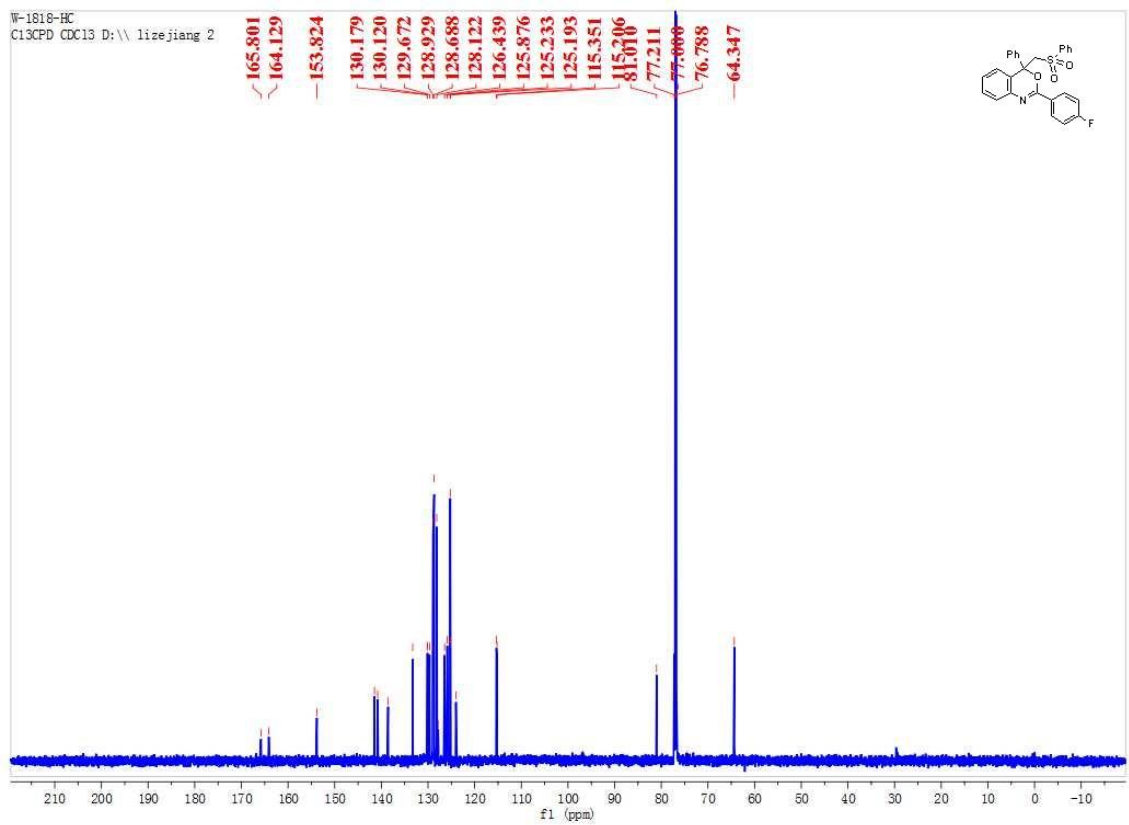

## 5-<sup>1</sup>H NMR

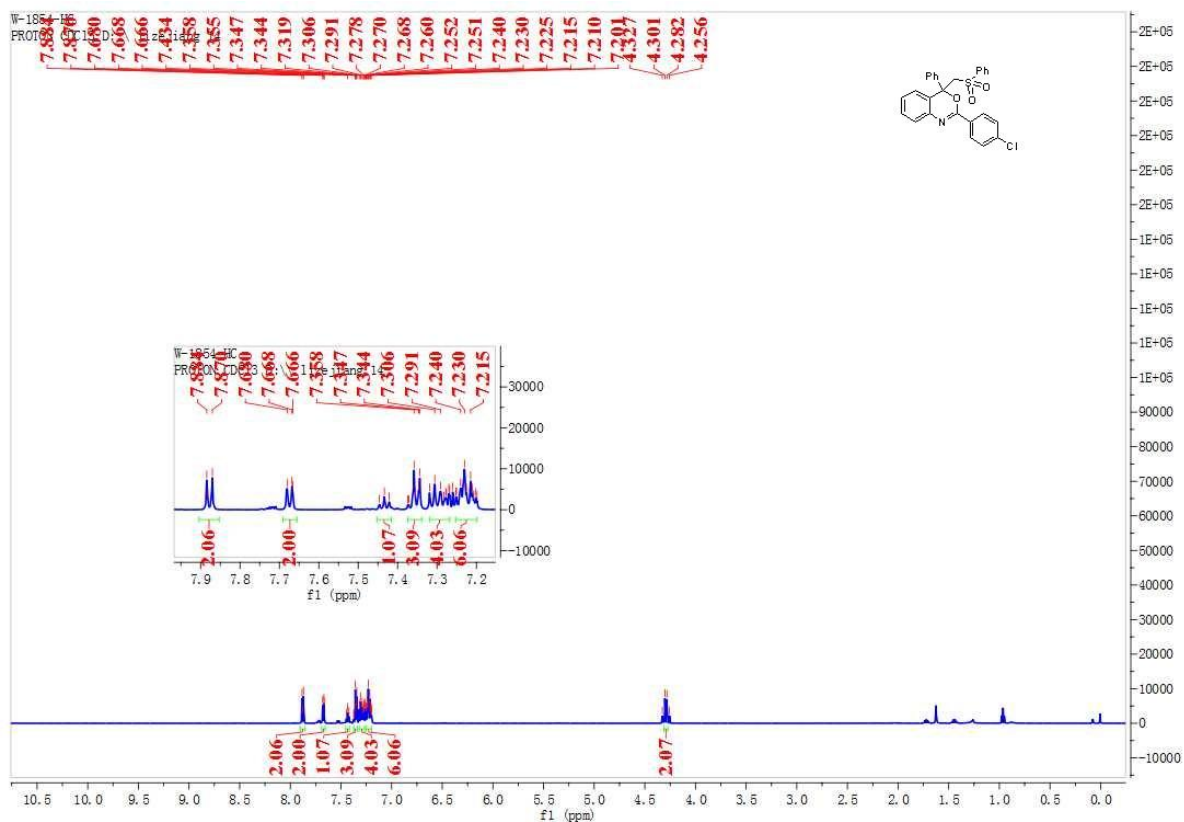

## 5-<sup>13</sup>C NMR

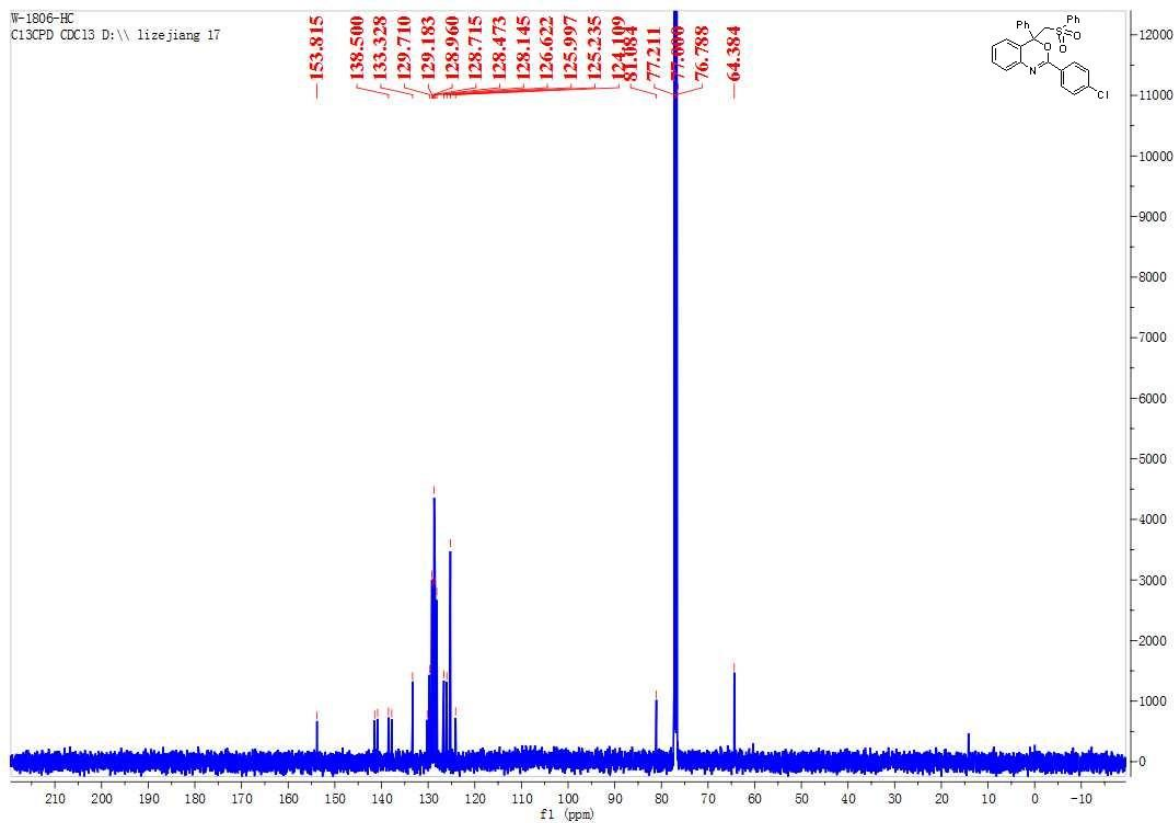

### 6-<sup>1</sup>H NMR

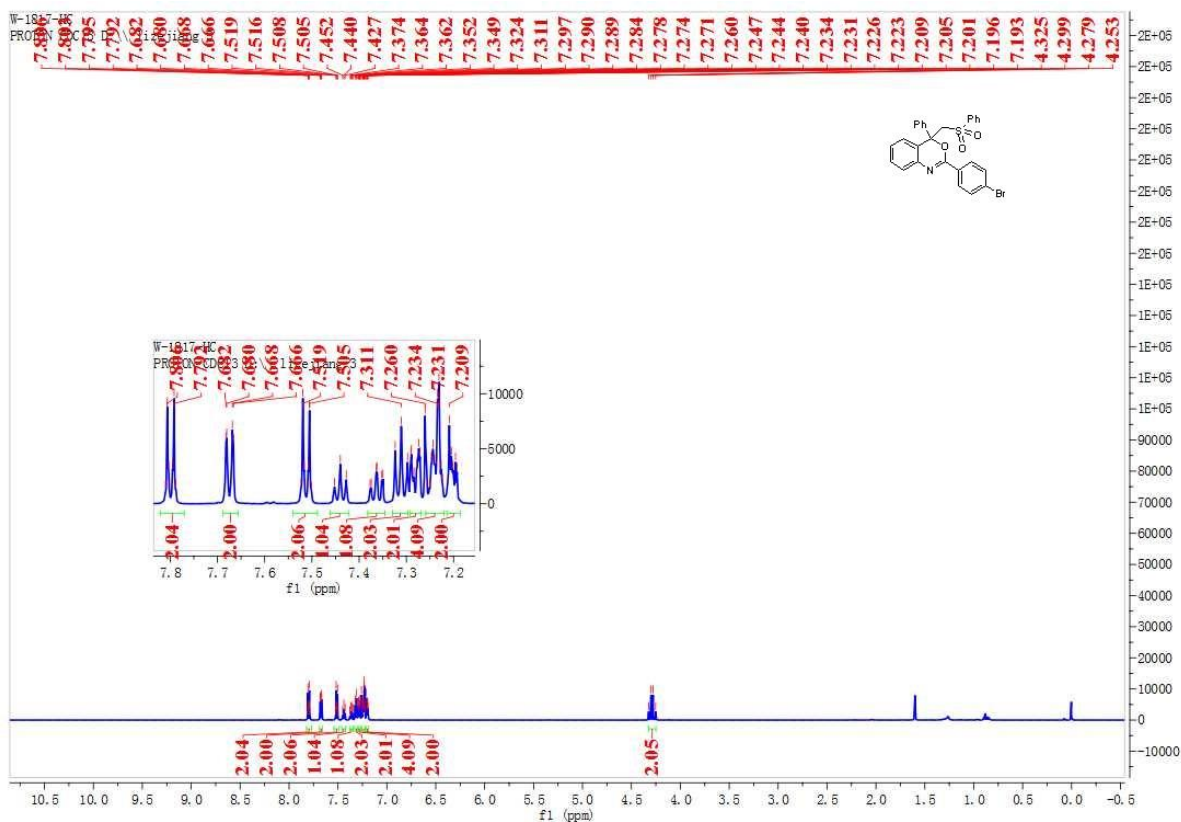

### 6-<sup>13</sup>C NMR

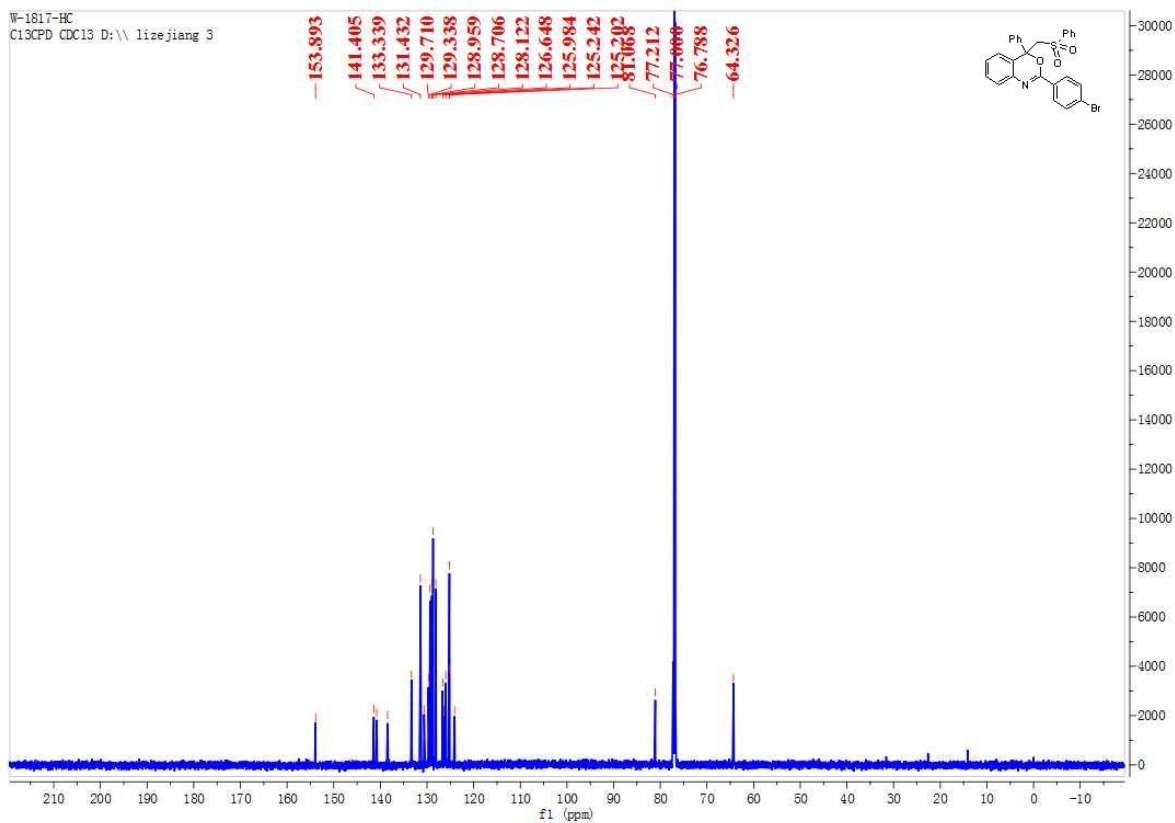



# 7-<sup>1</sup>H NMR

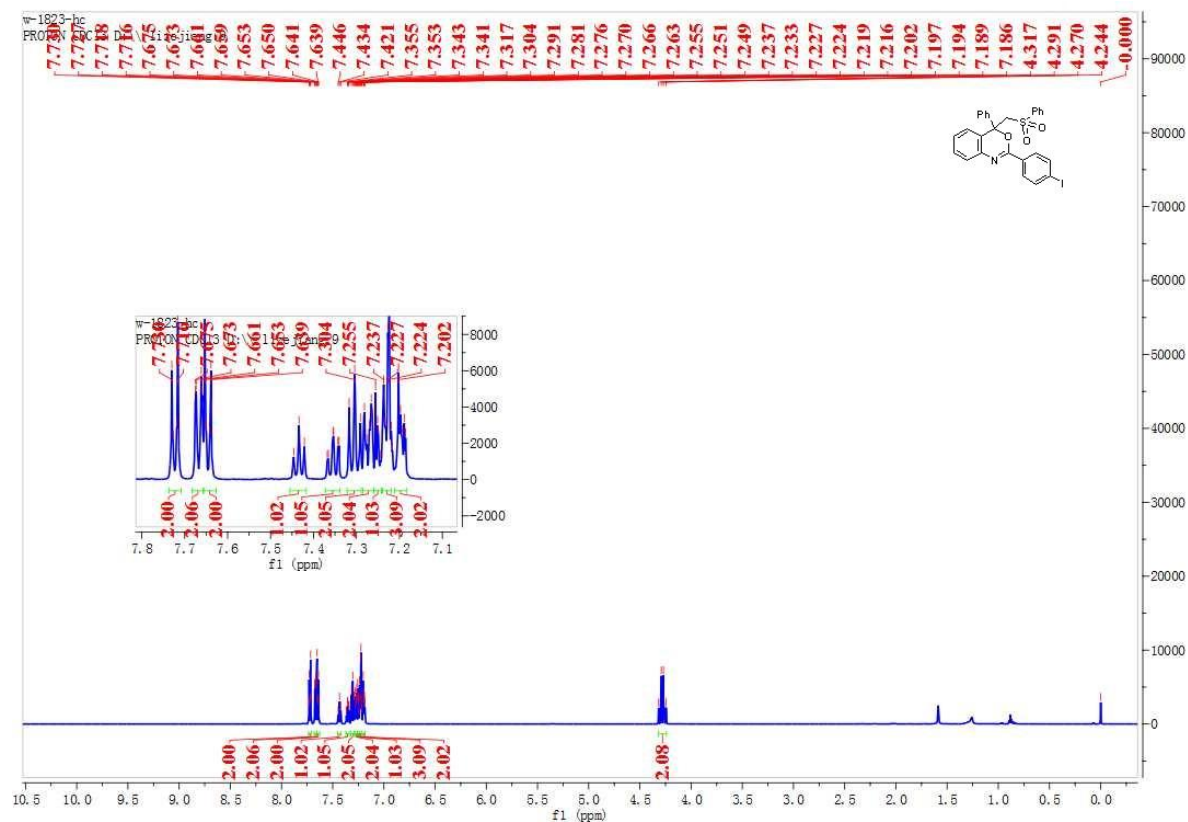

# 7-<sup>13</sup>C NMR

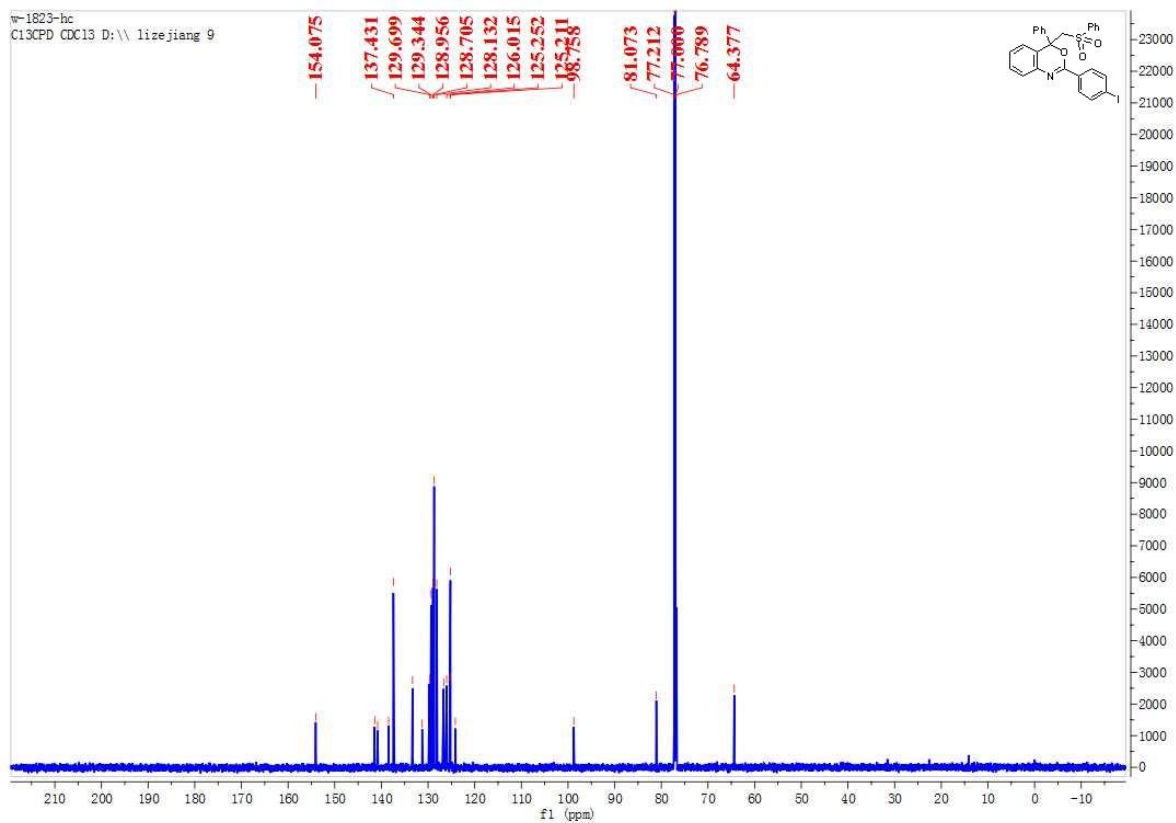

# 8-<sup>1</sup>H NMR

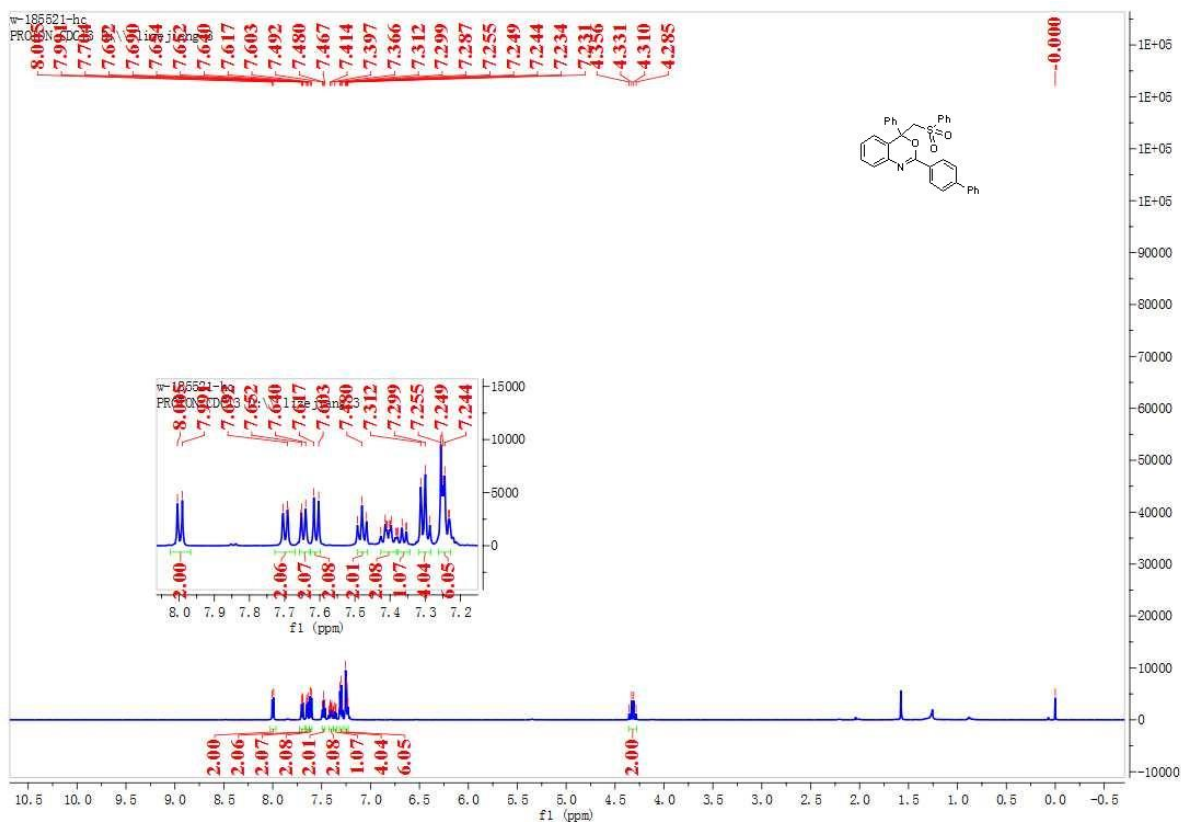

# 8-<sup>13</sup>C NMR

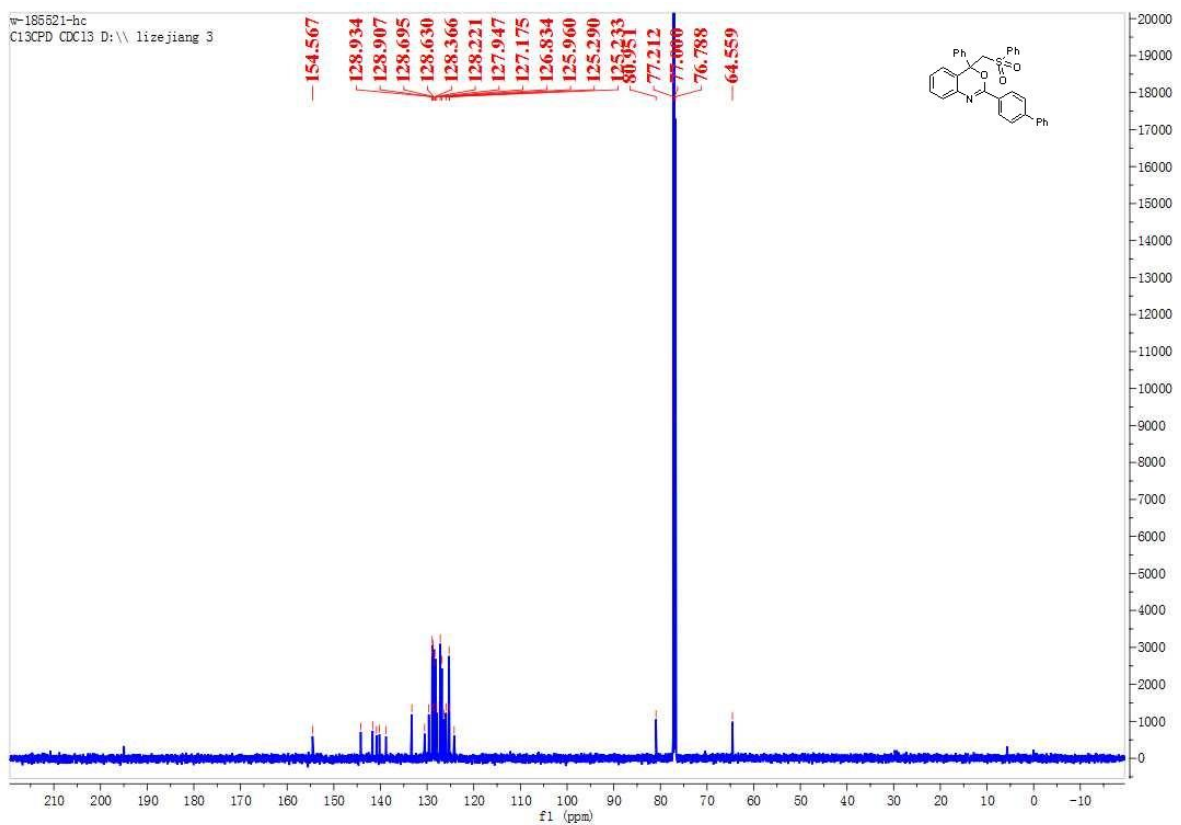



# 9-<sup>1</sup>H NMR

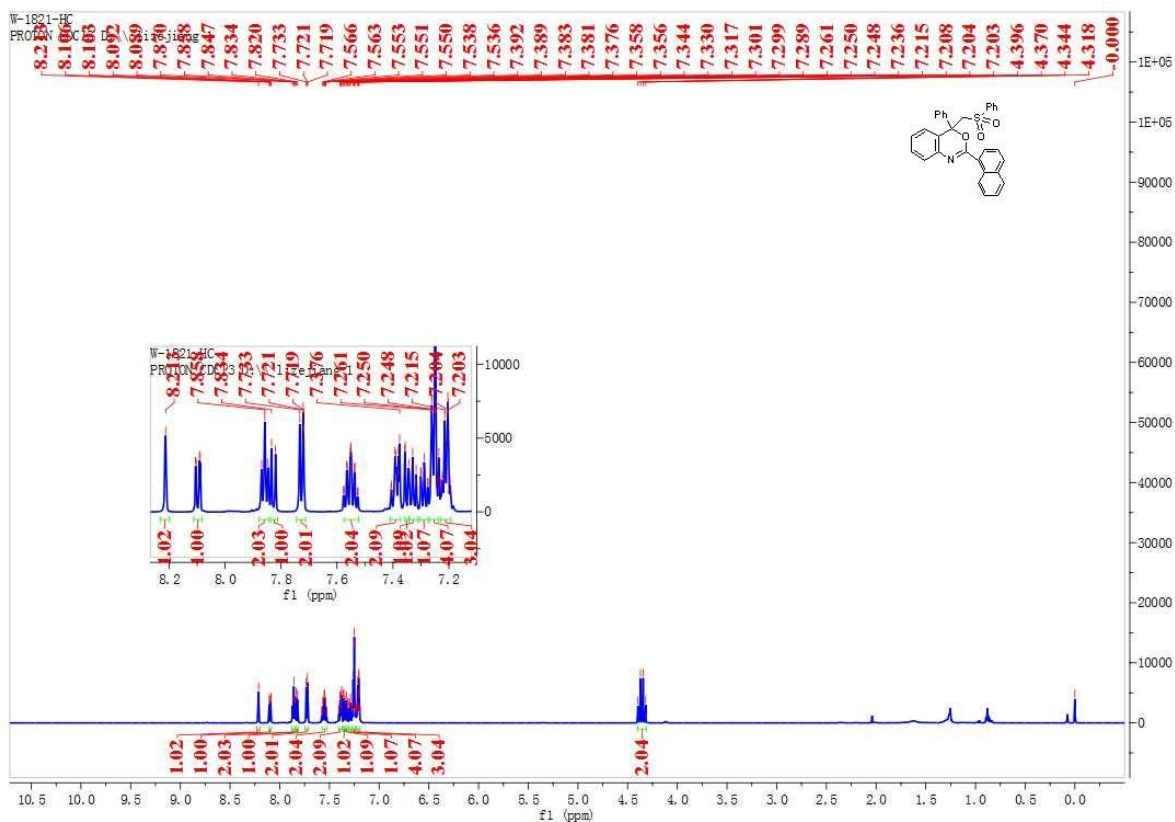

# 9-<sup>13</sup>C NMR

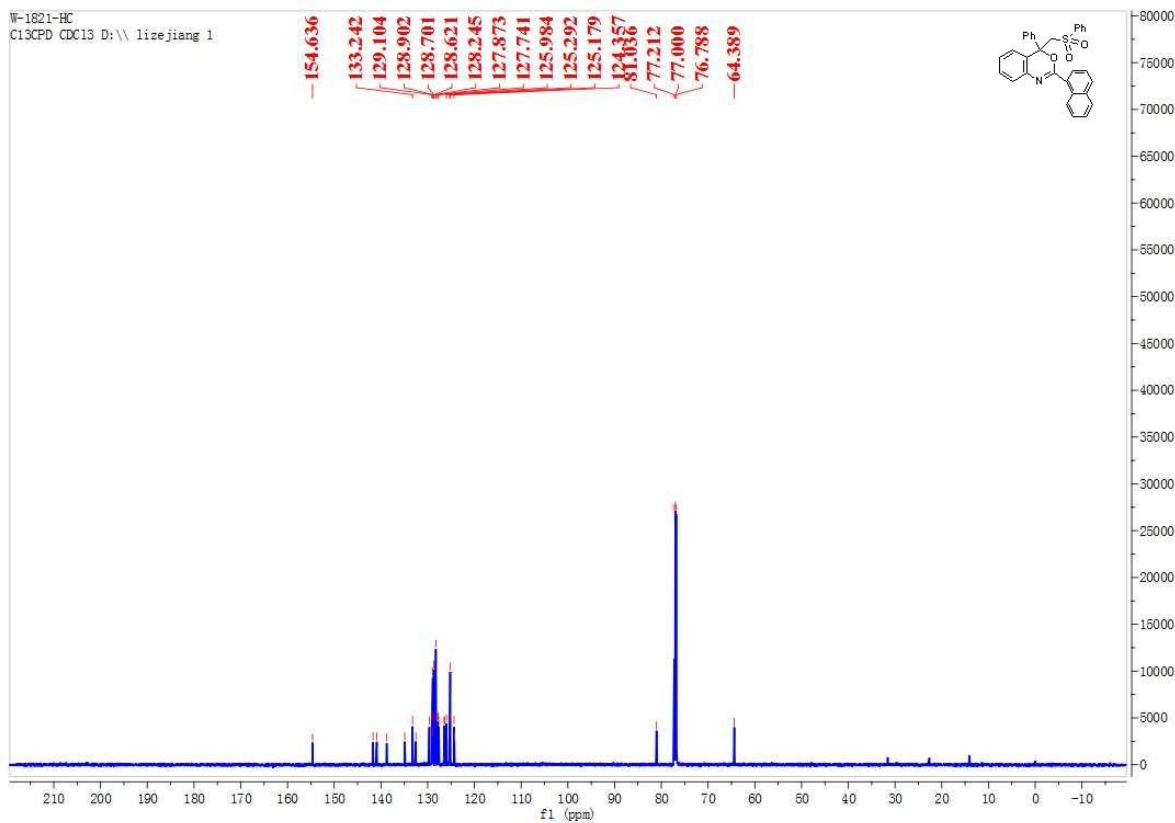

# 10-<sup>1</sup>H NMR

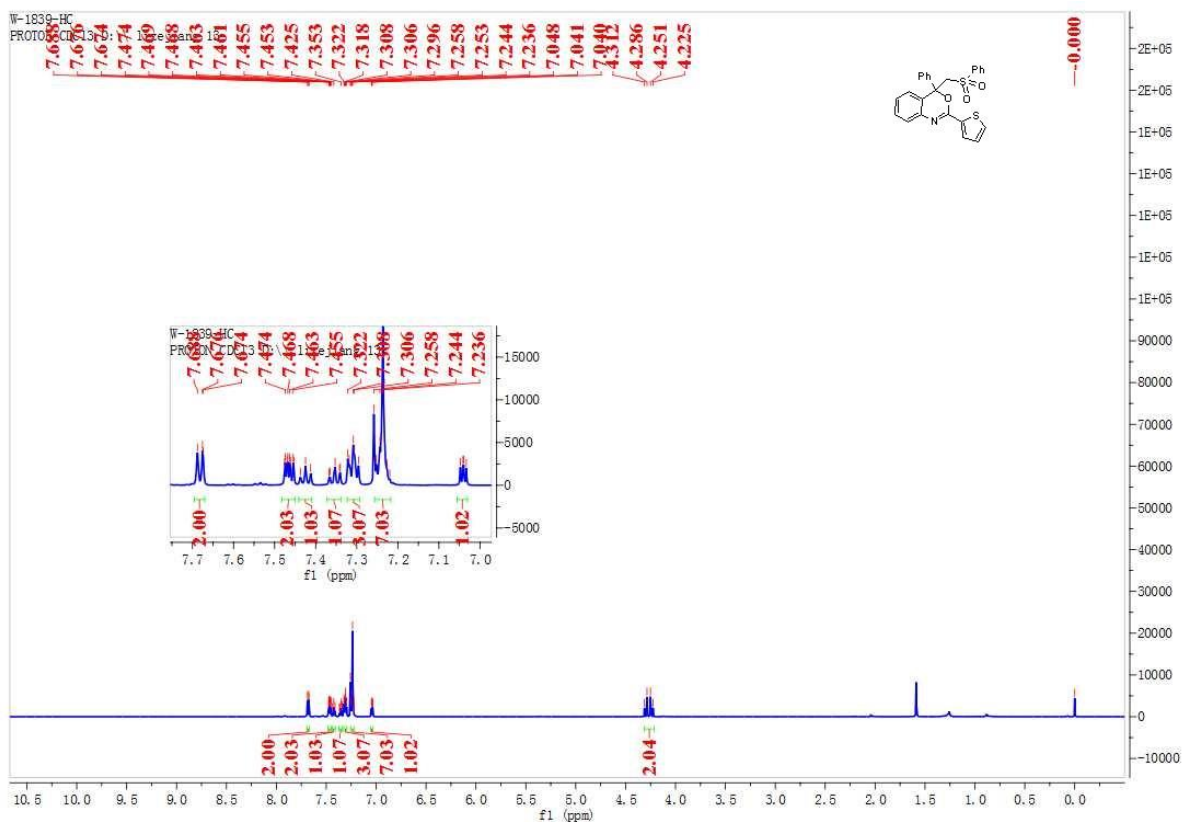

# 10-<sup>13</sup>C NMR

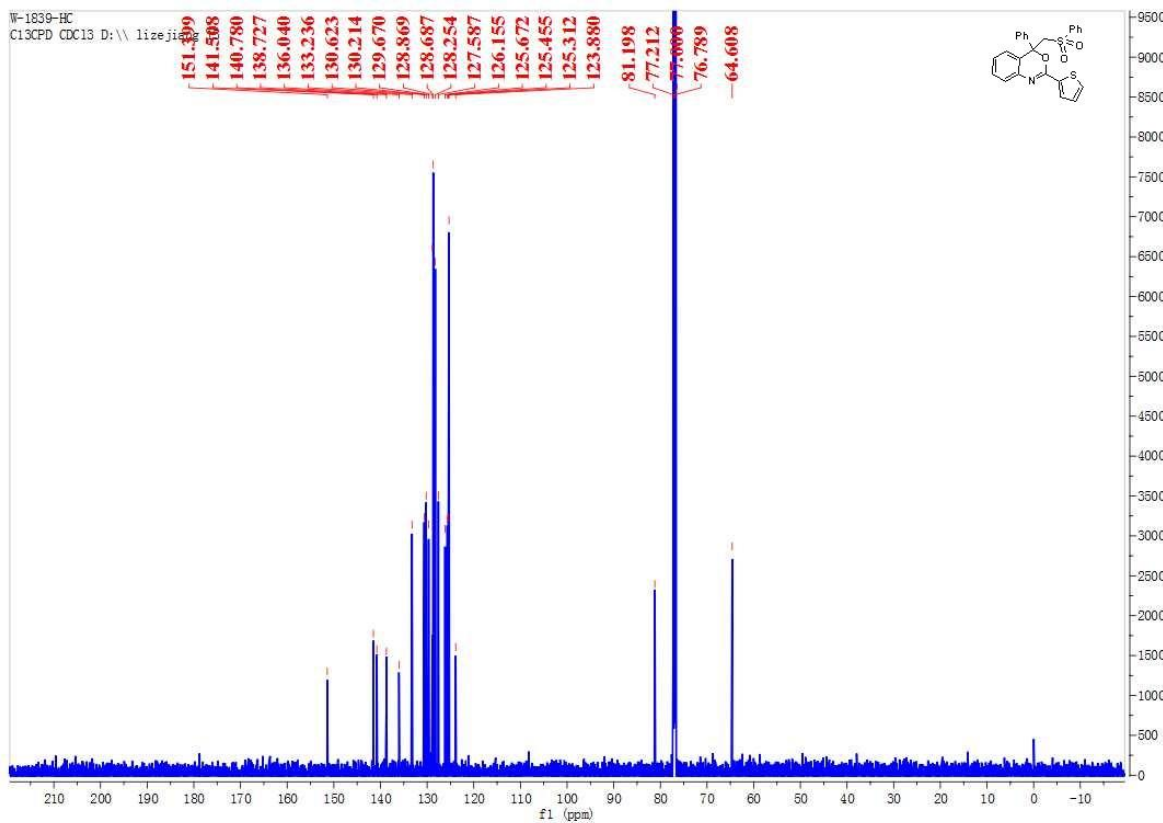

# 11-<sup>1</sup>H NMR

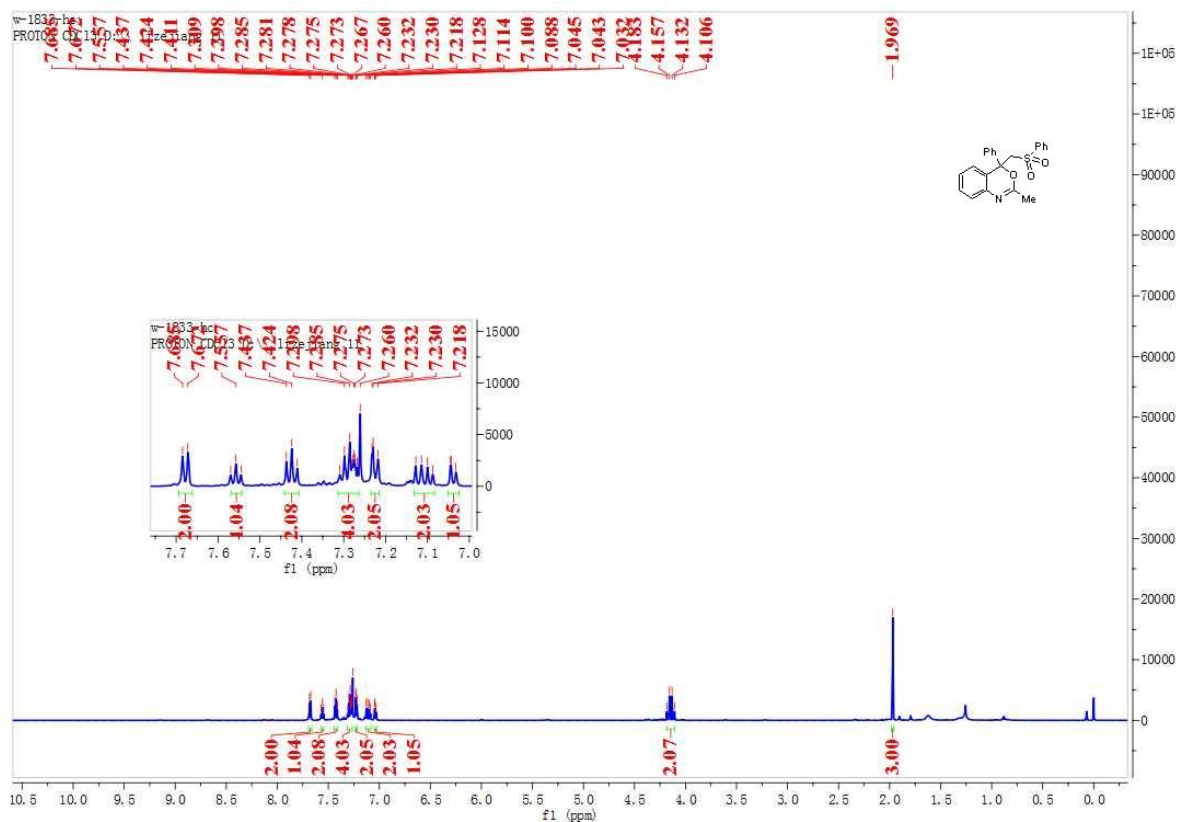

# 11-<sup>13</sup>C NMR

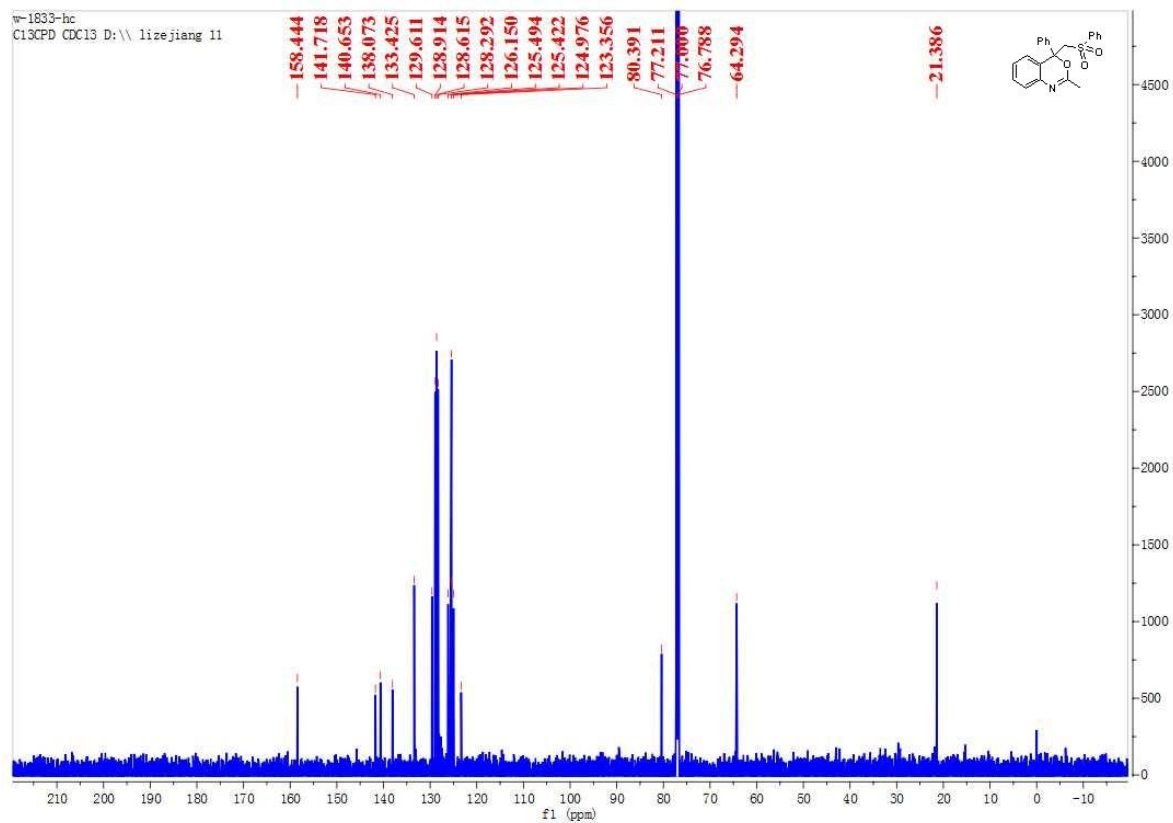

## 12-<sup>1</sup>H NMR

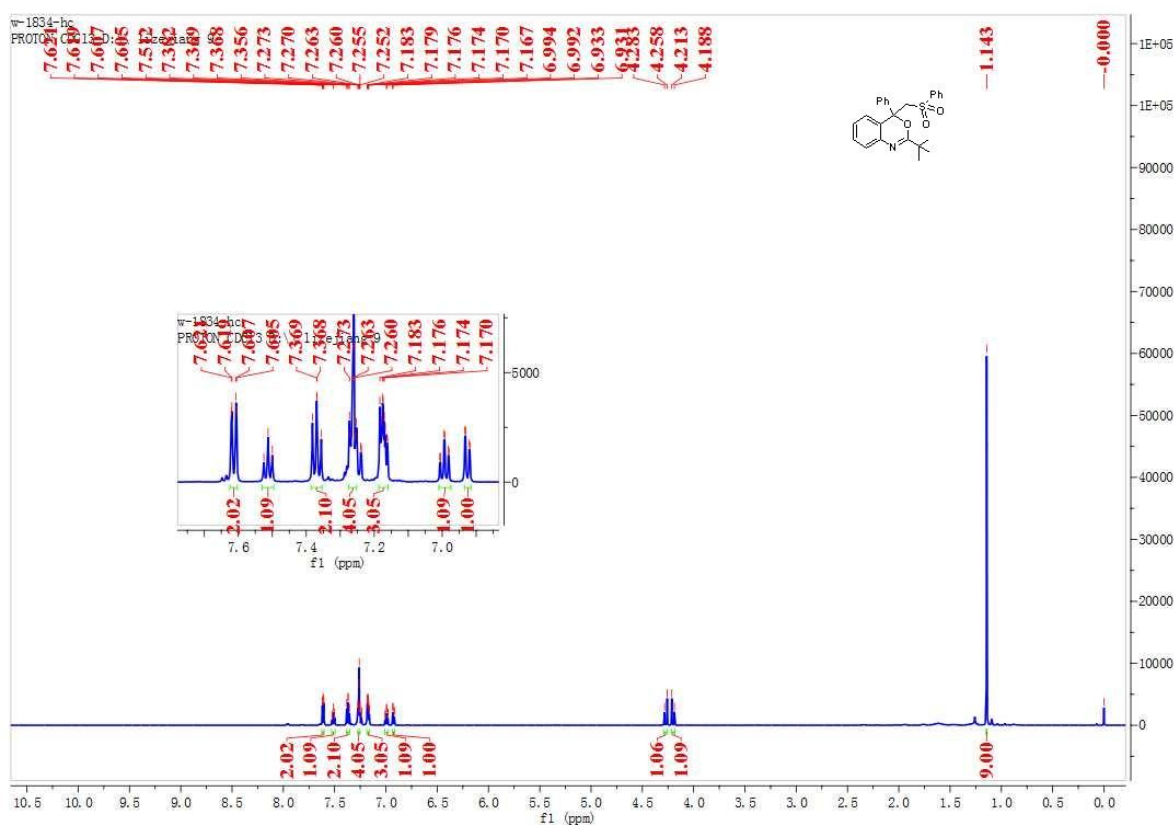

## 12-<sup>13</sup>C NMR

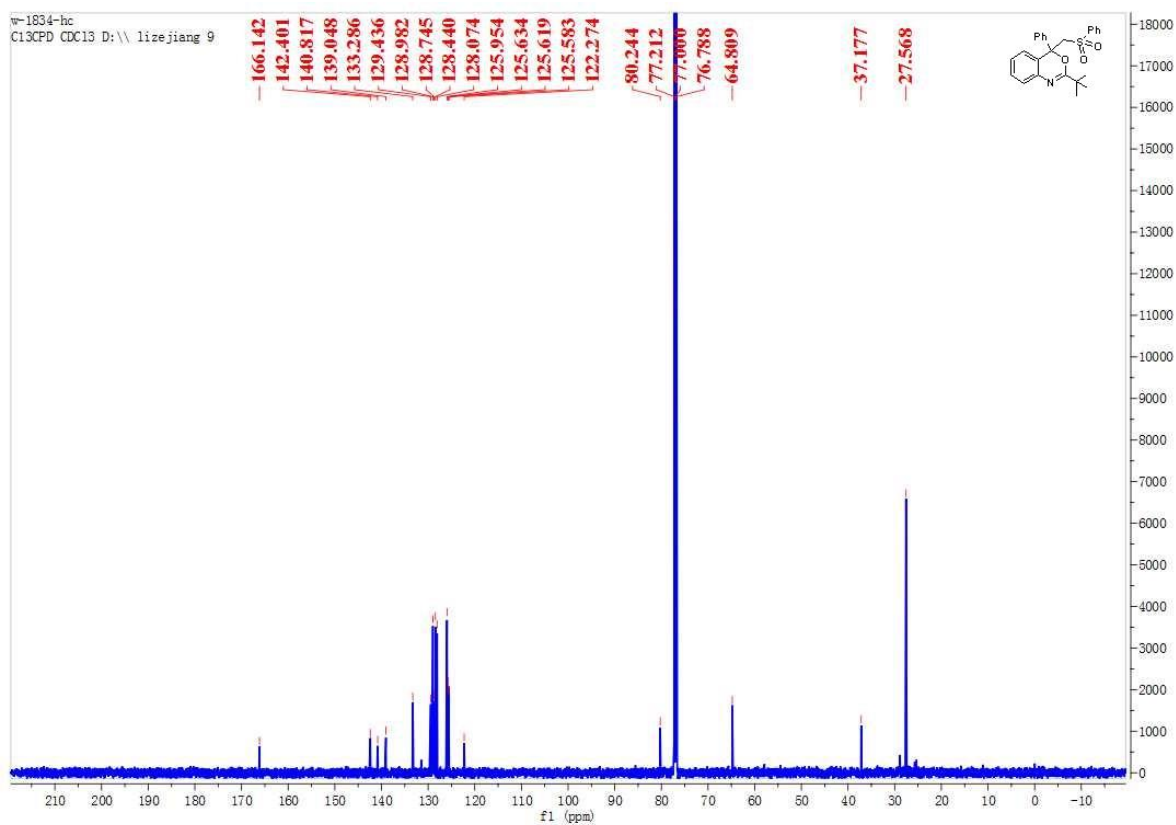

### 13-<sup>1</sup>H NMR

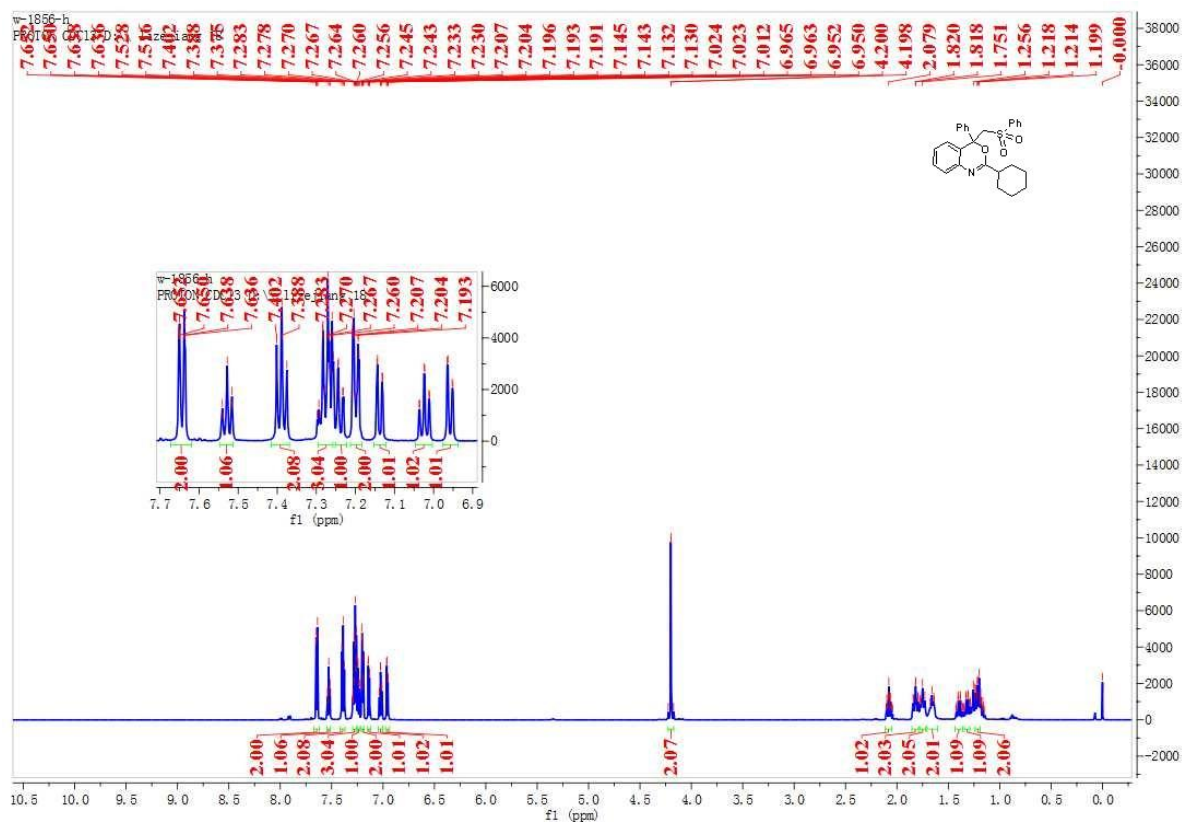

### 13-<sup>13</sup>C NMR

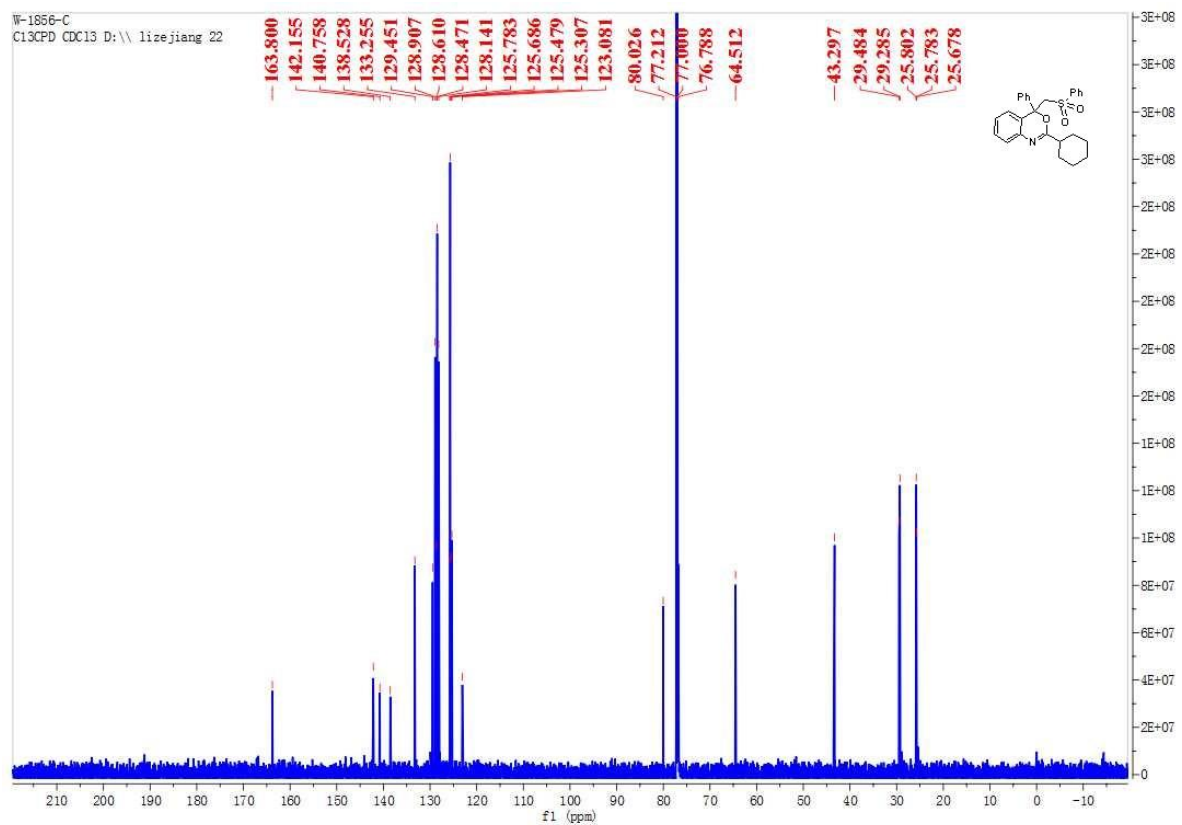



# 14-<sup>1</sup>H NMR

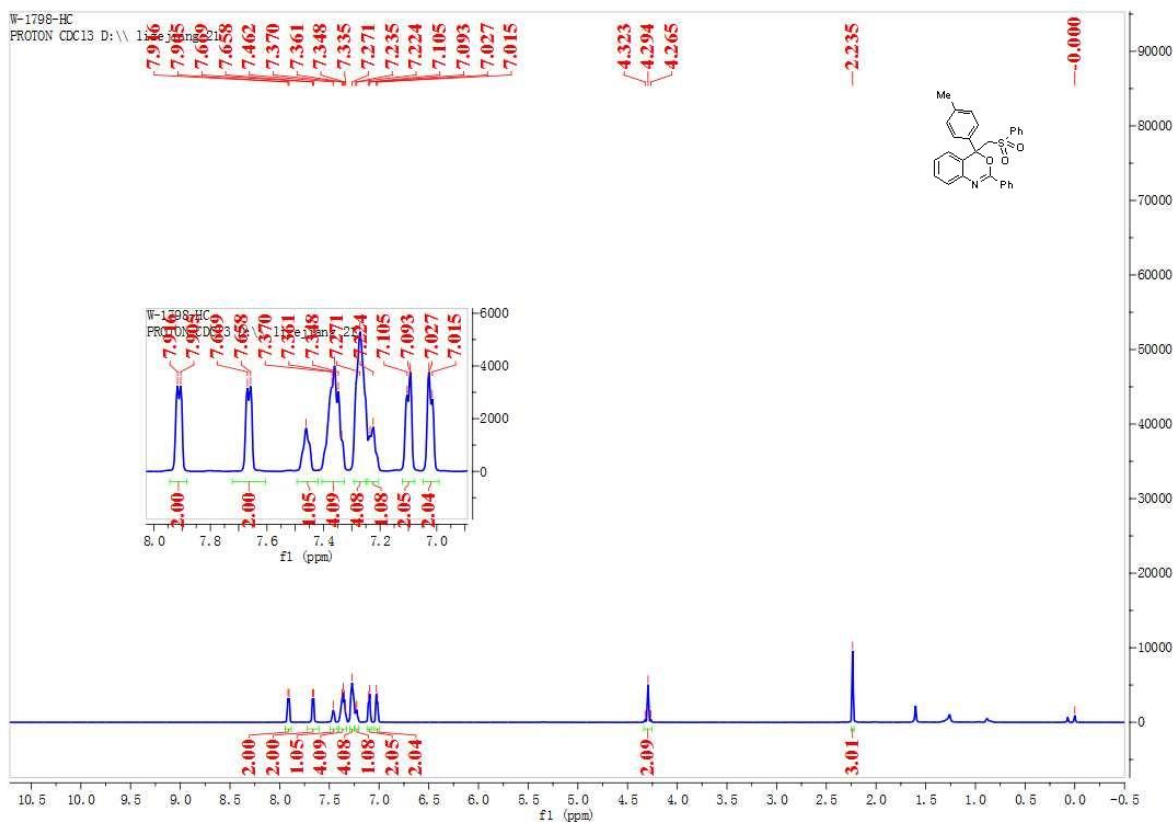

# 14-<sup>13</sup>C NMR

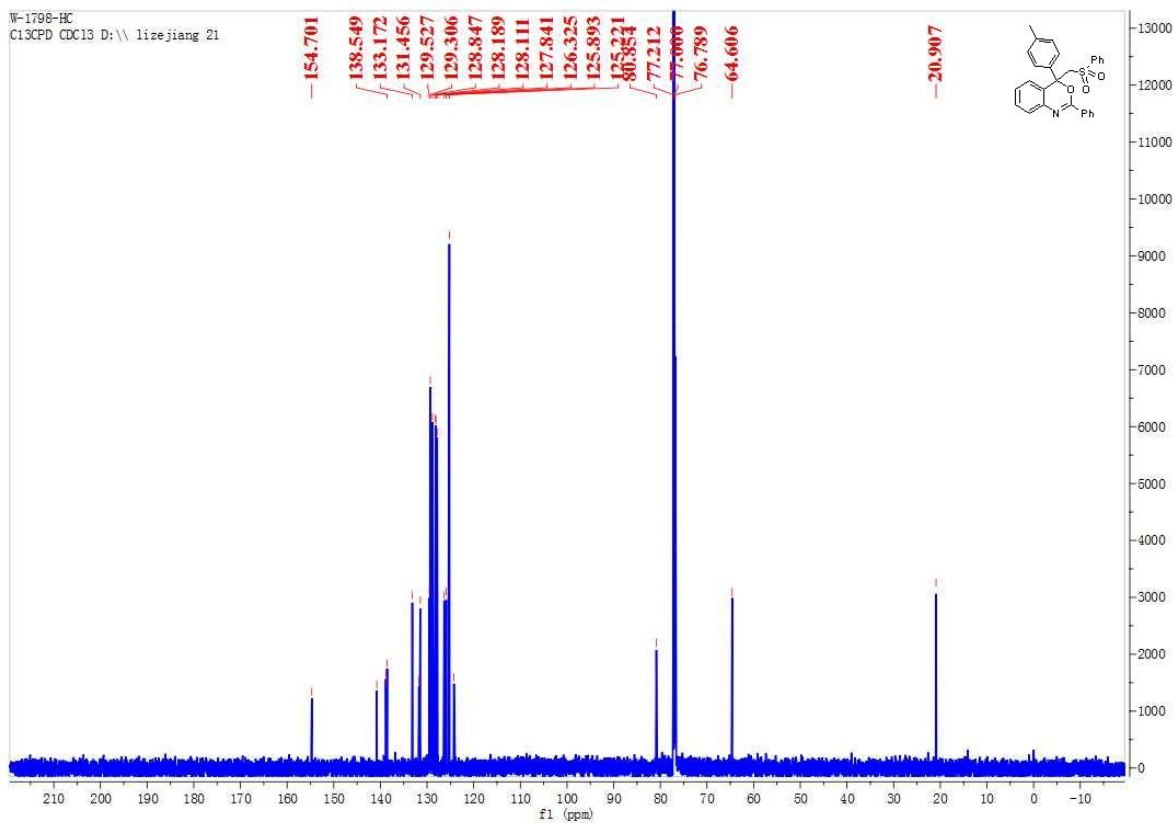

# 15-<sup>1</sup>H NMR

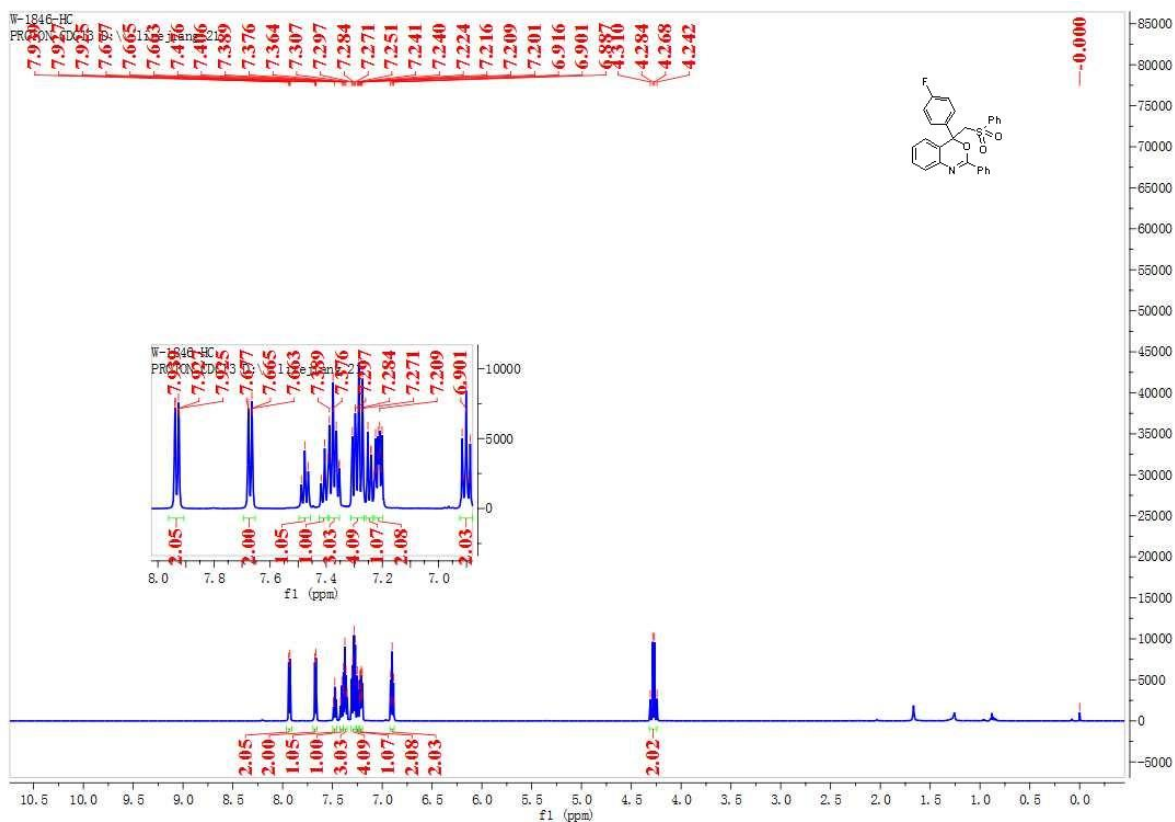

# 15-<sup>13</sup>C NMR

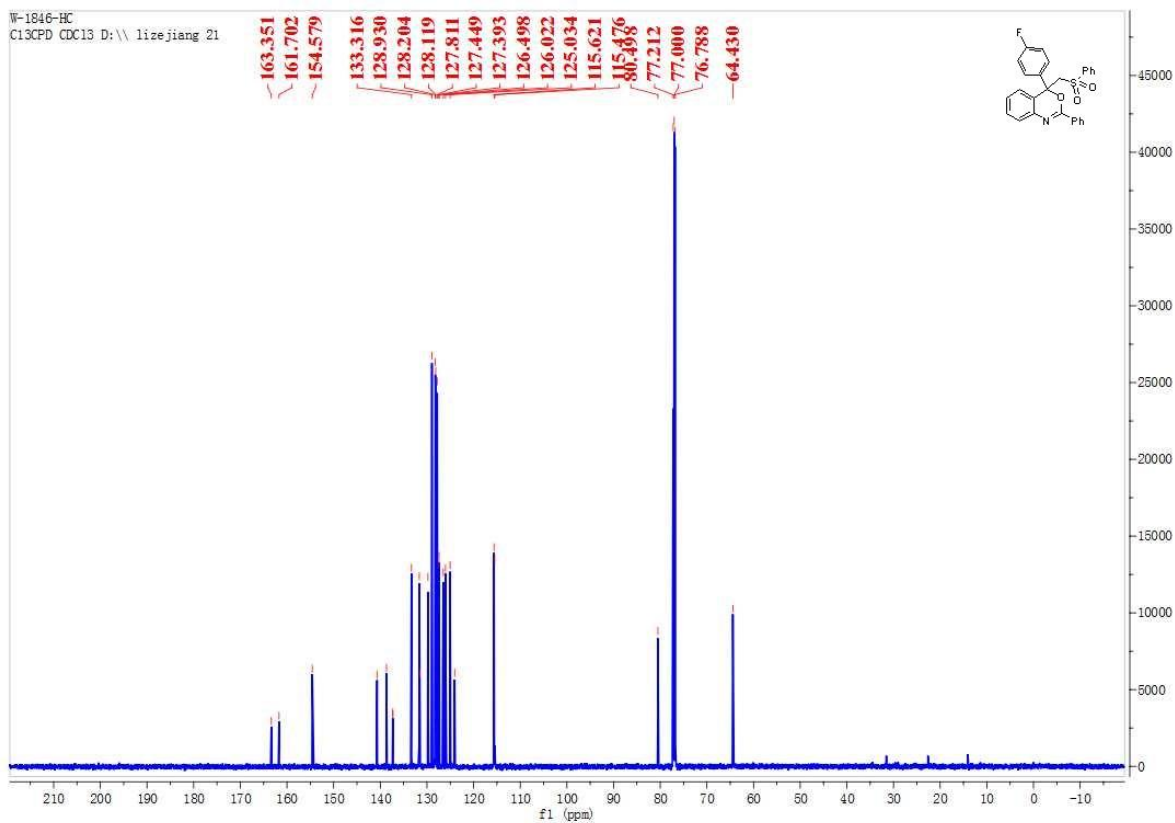

### 16-<sup>1</sup>H NMR

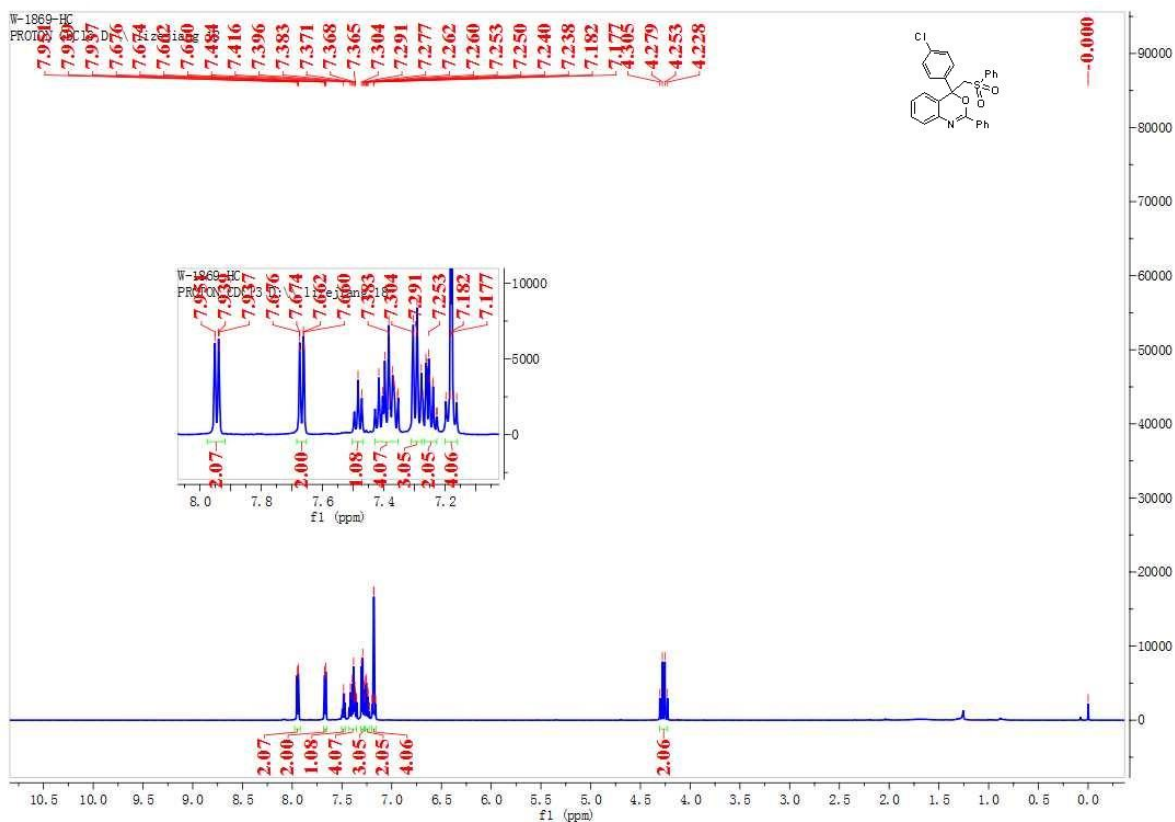

### 16-<sup>13</sup>C NMR

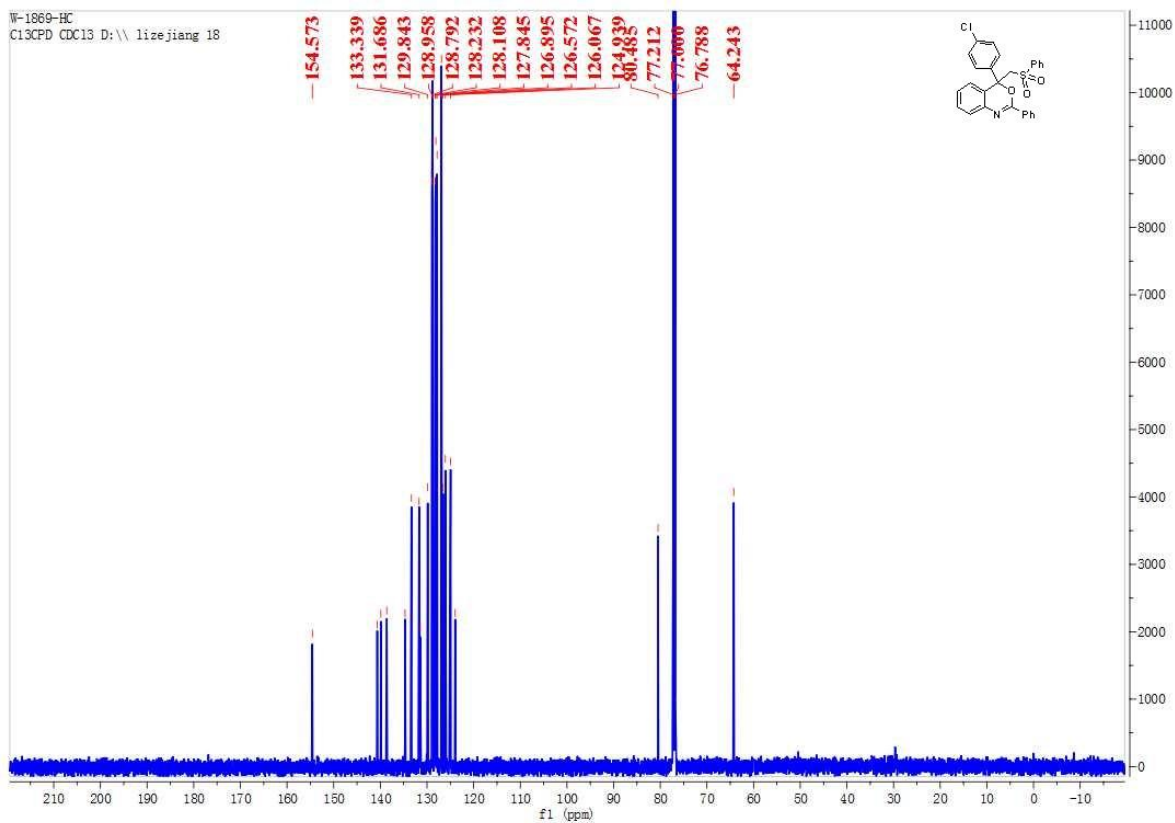



### 18-<sup>1</sup>H NMR

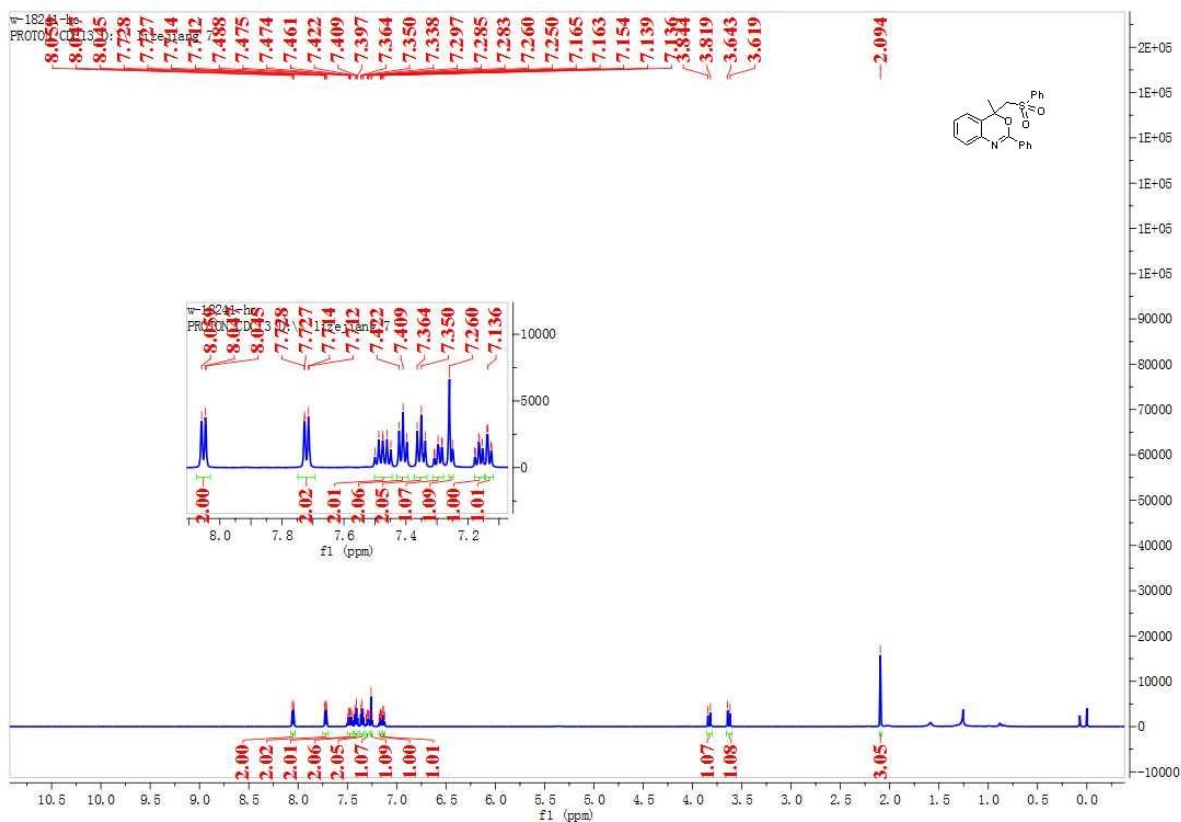

### 18-<sup>13</sup>C NMR

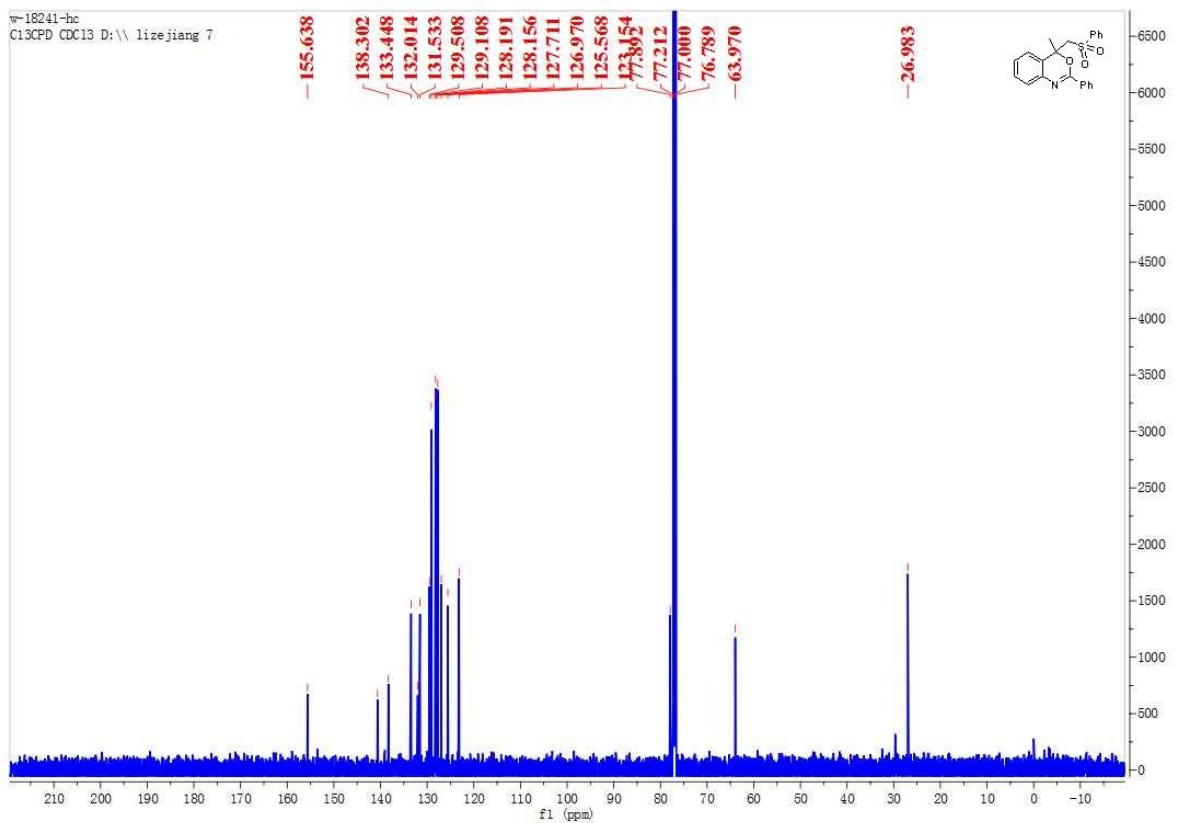

# 19-<sup>1</sup>H NMR

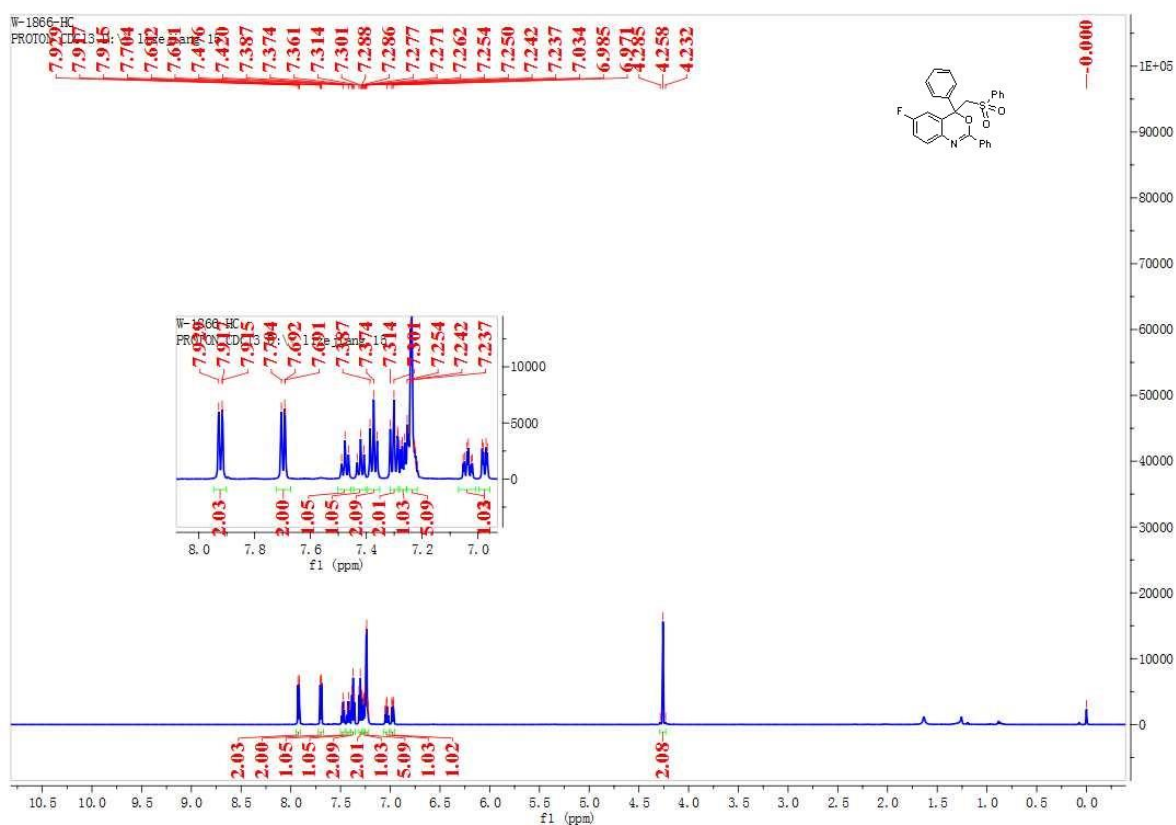

# 19-<sup>13</sup>C NMR

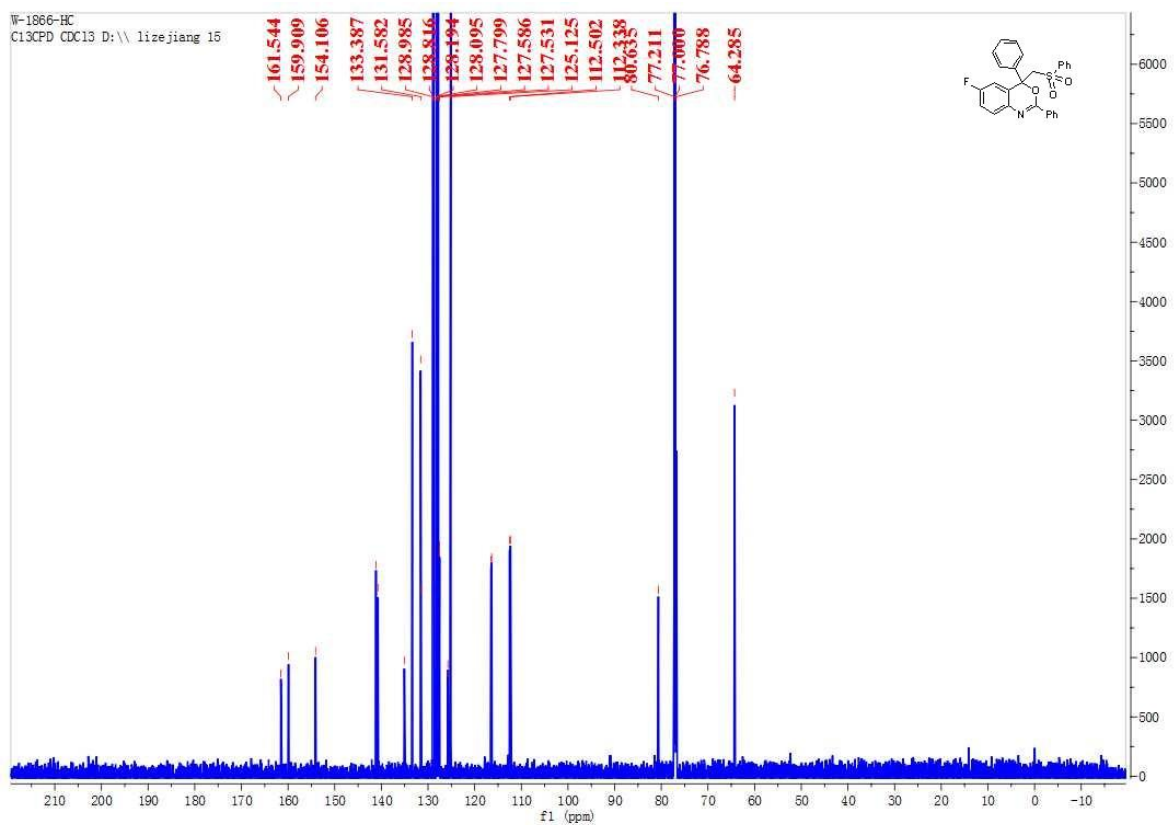

## 20-<sup>1</sup>H NMR

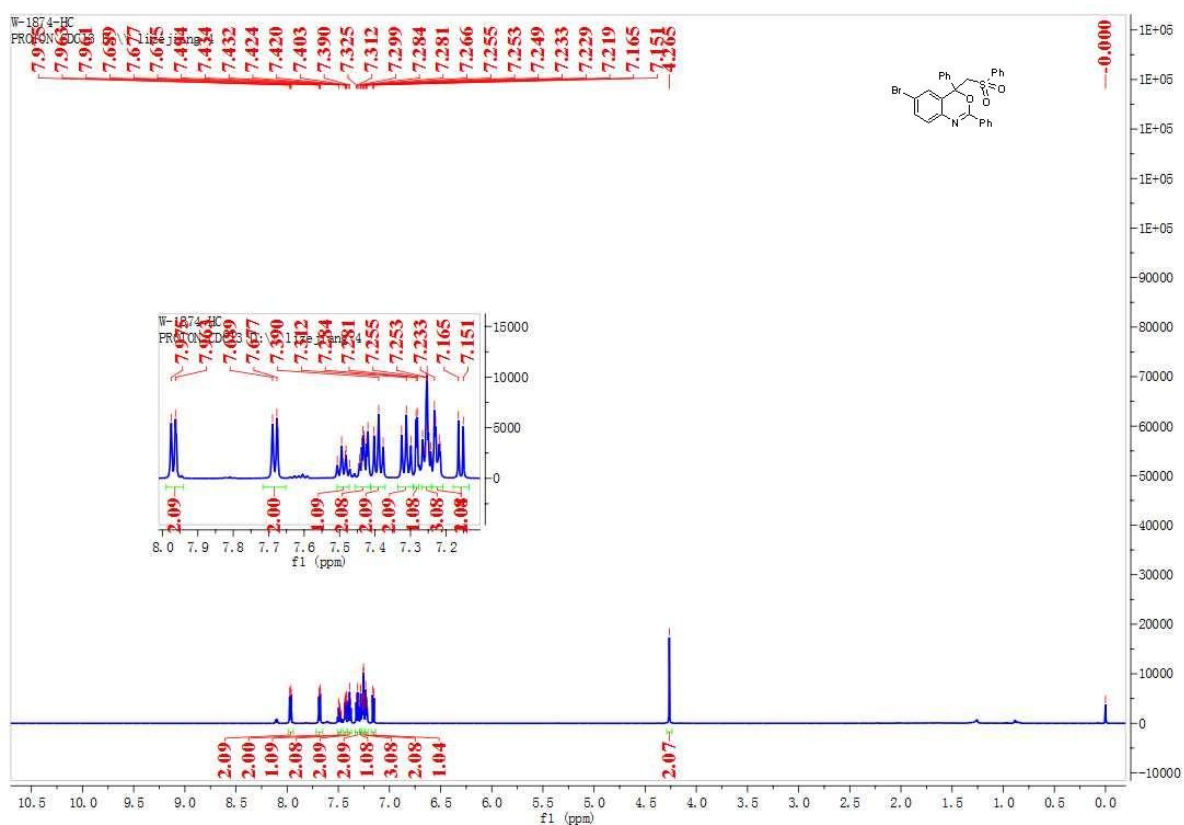

## 20-<sup>13</sup>C NMR

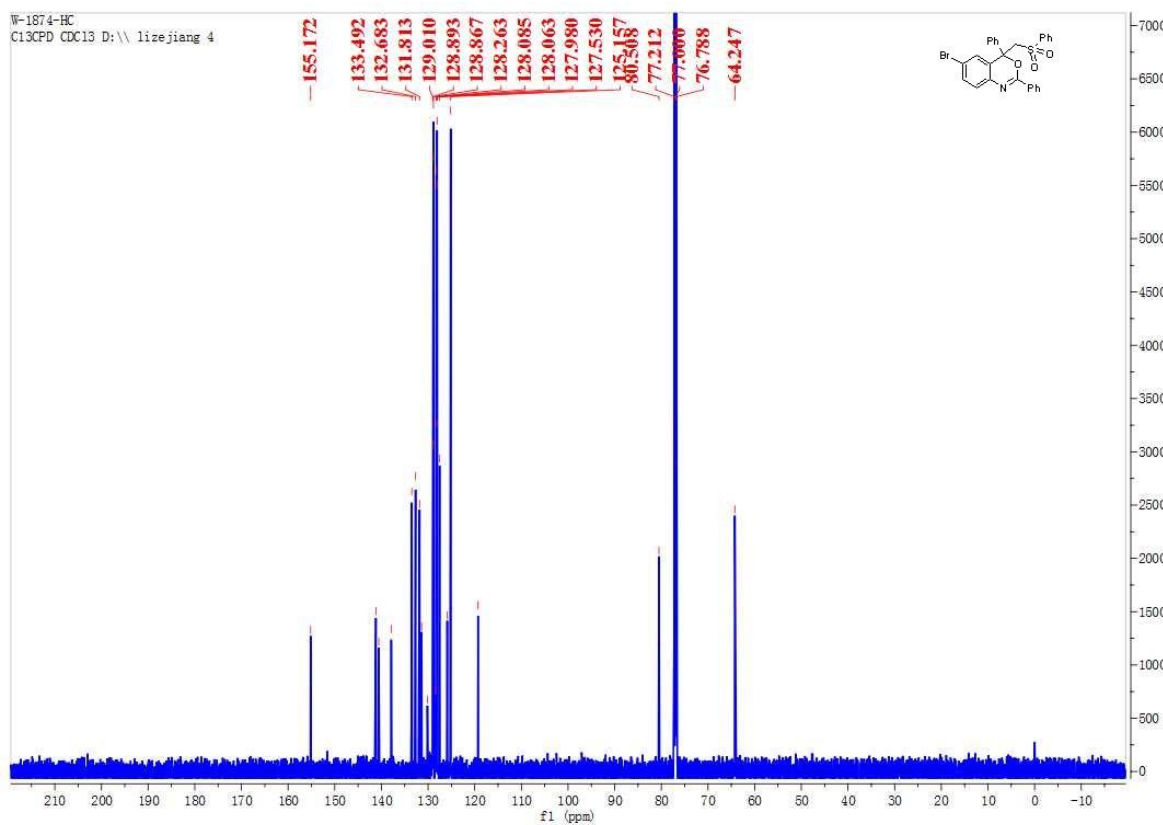

## 21-<sup>1</sup>H NMR

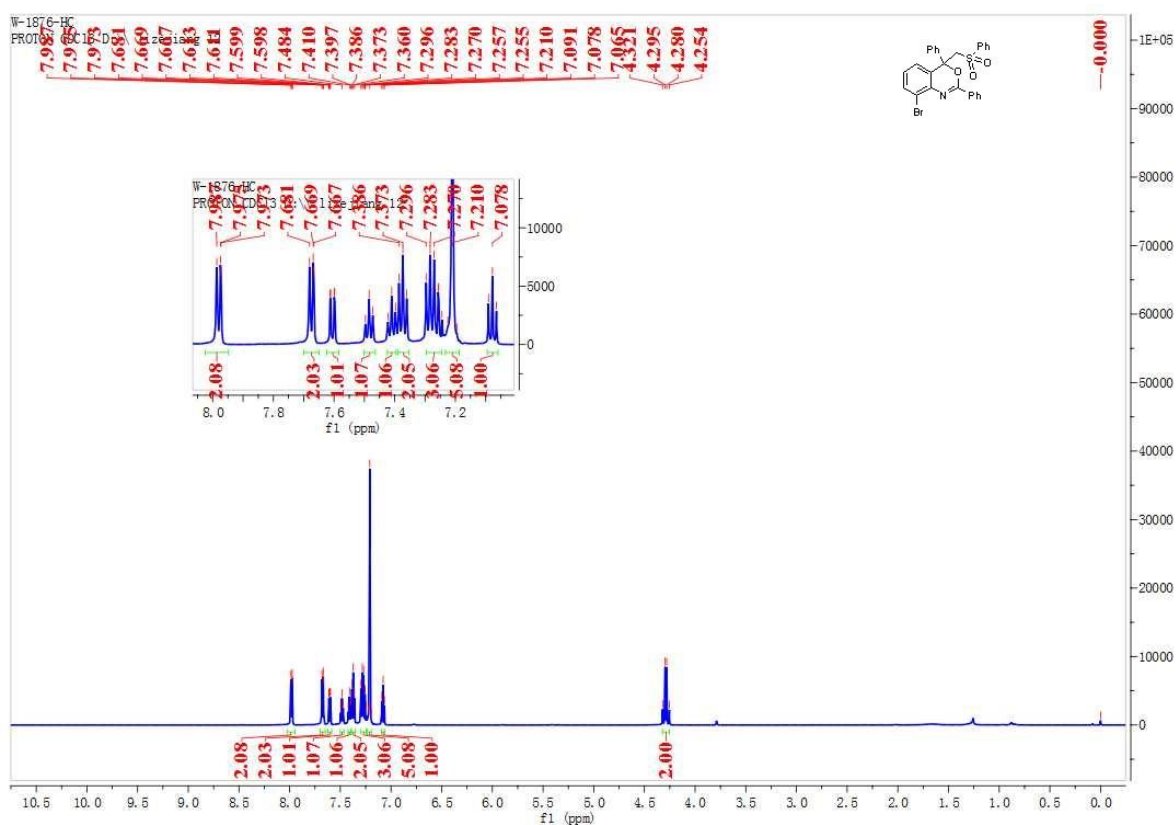

## 21-<sup>13</sup>C NMR

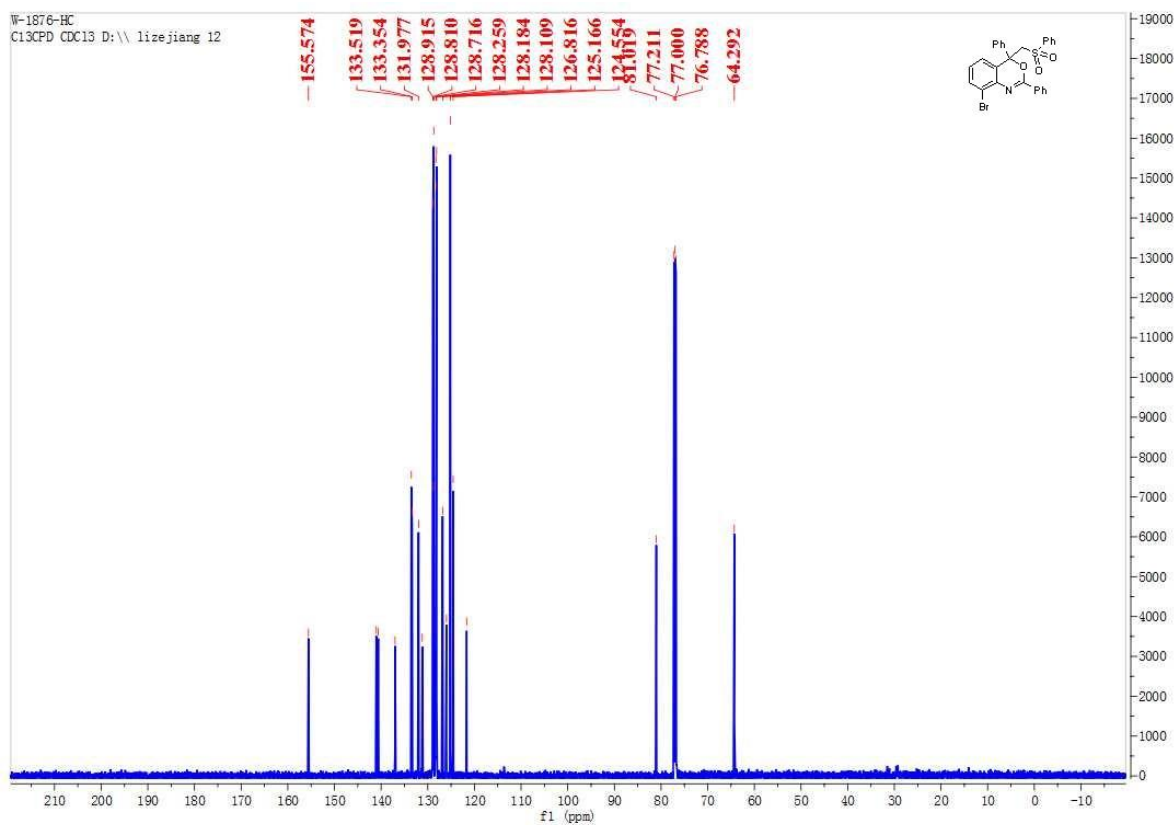

## 22-<sup>1</sup>H NMR

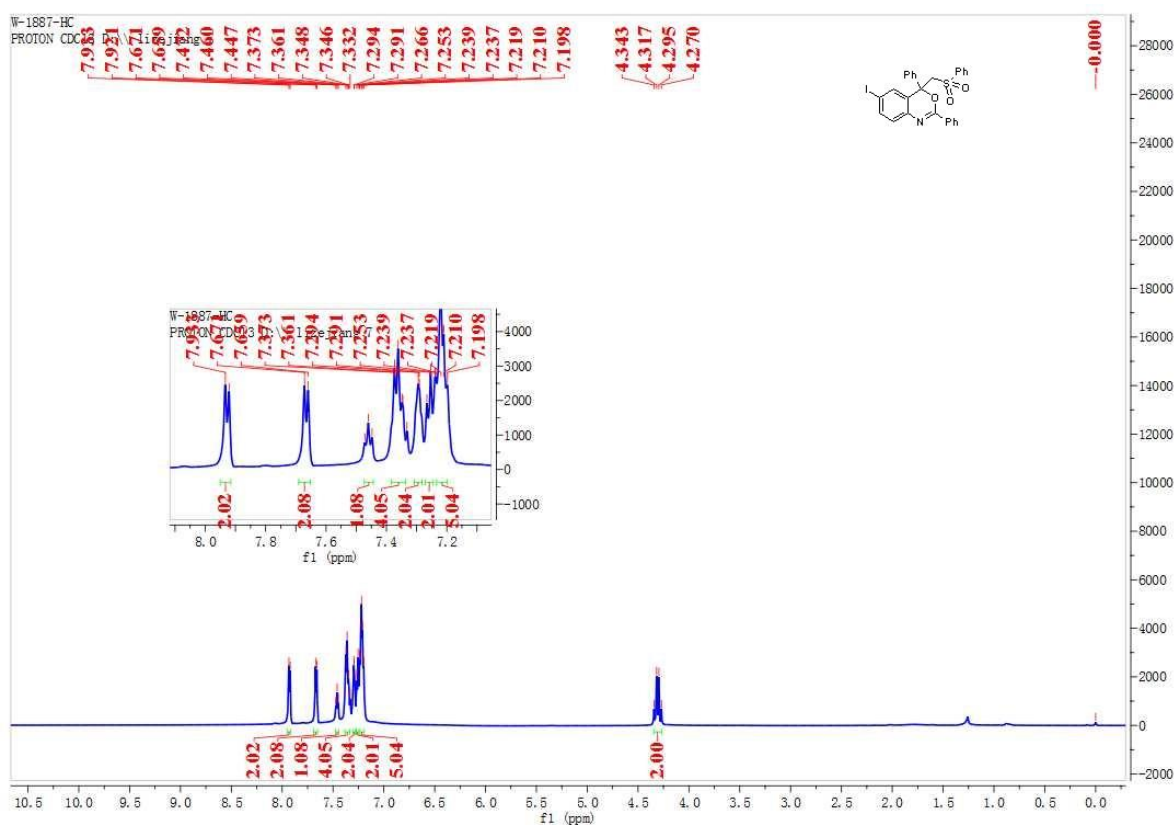

## 22-<sup>13</sup>C NMR

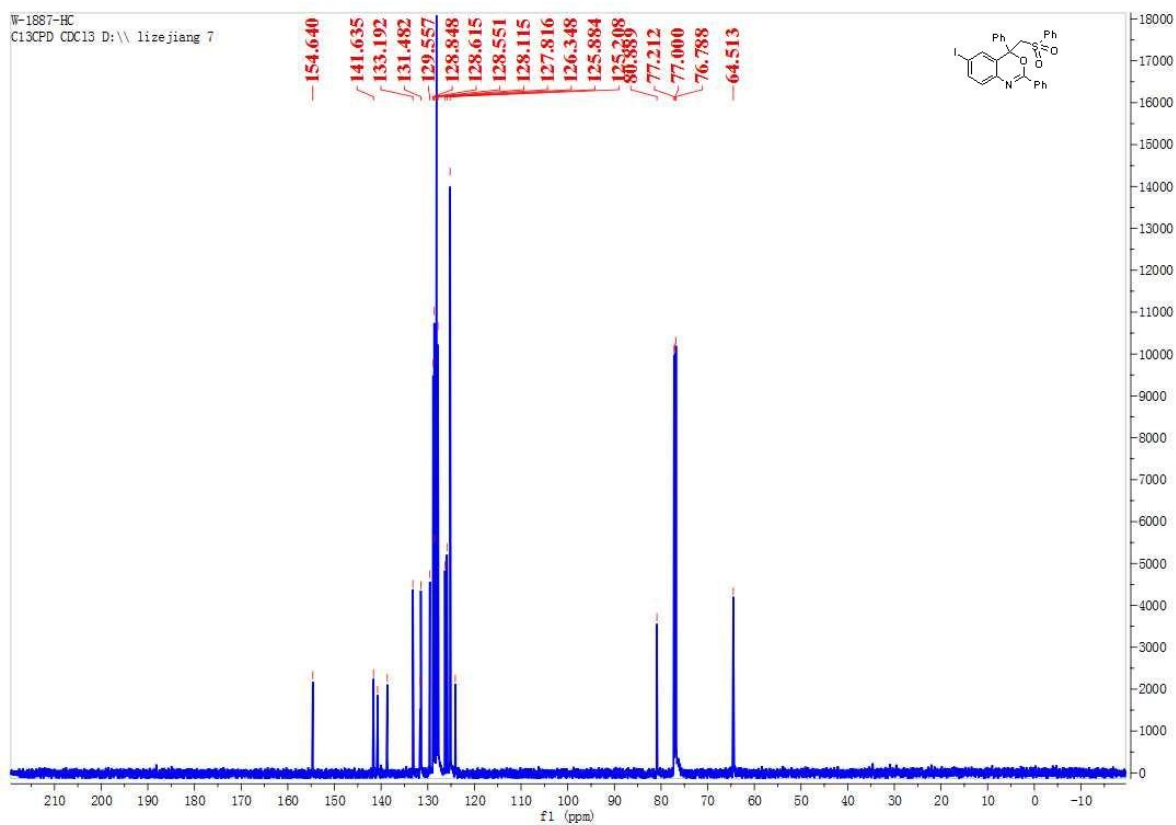

### 23-<sup>1</sup>H NMR

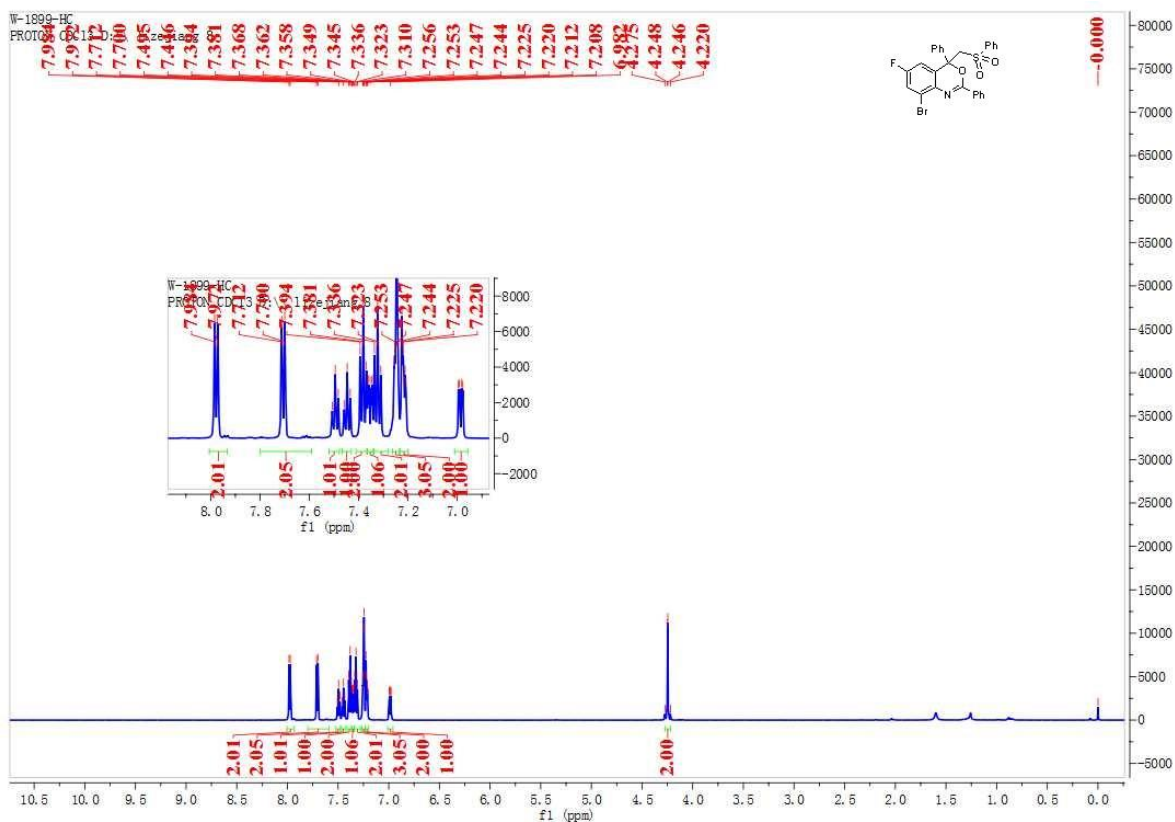

### 23-<sup>13</sup>C NMR

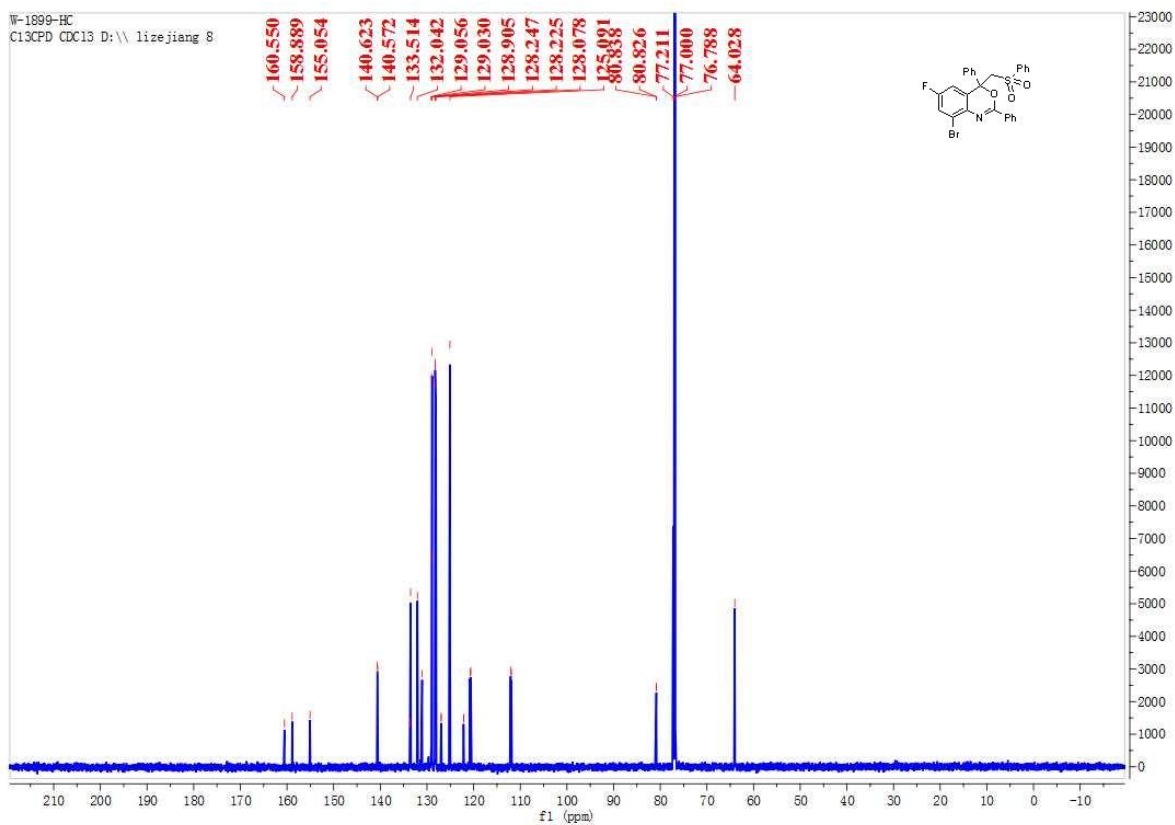



## 24-<sup>1</sup>H NMR

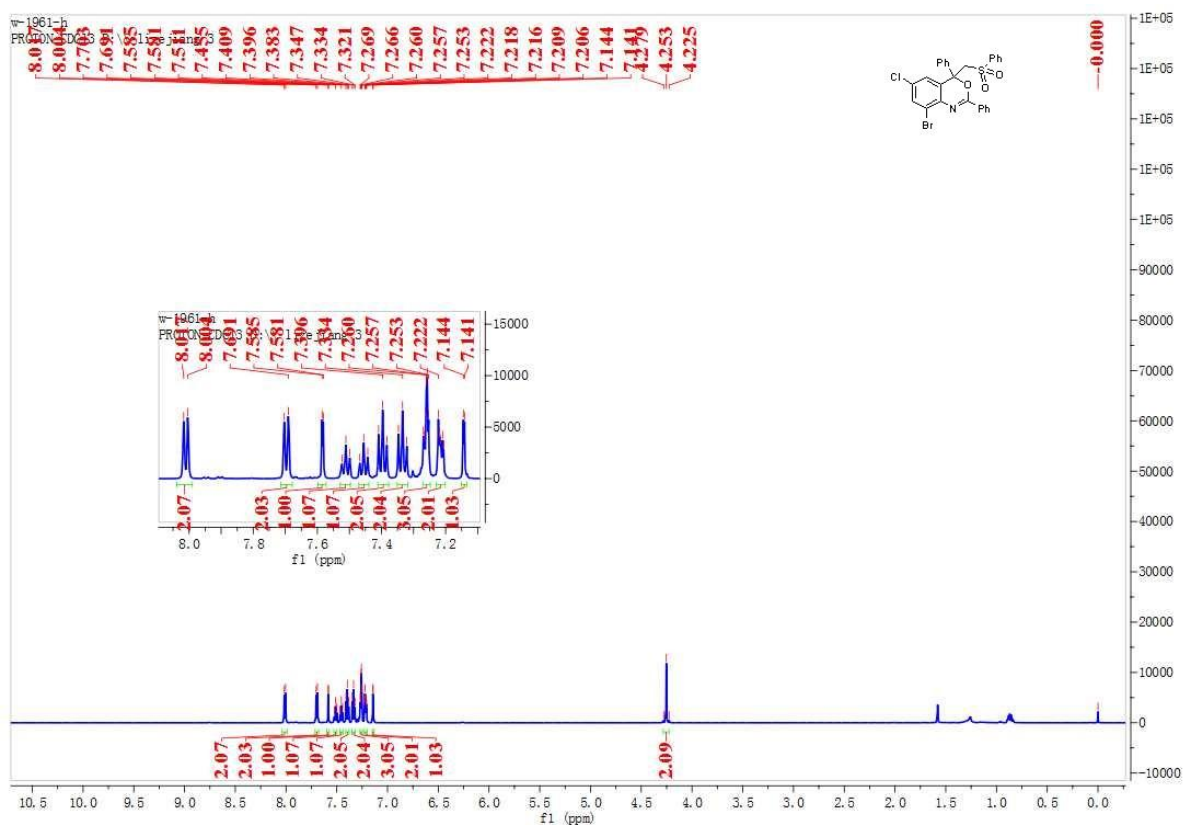

## 24-<sup>13</sup>C NMR

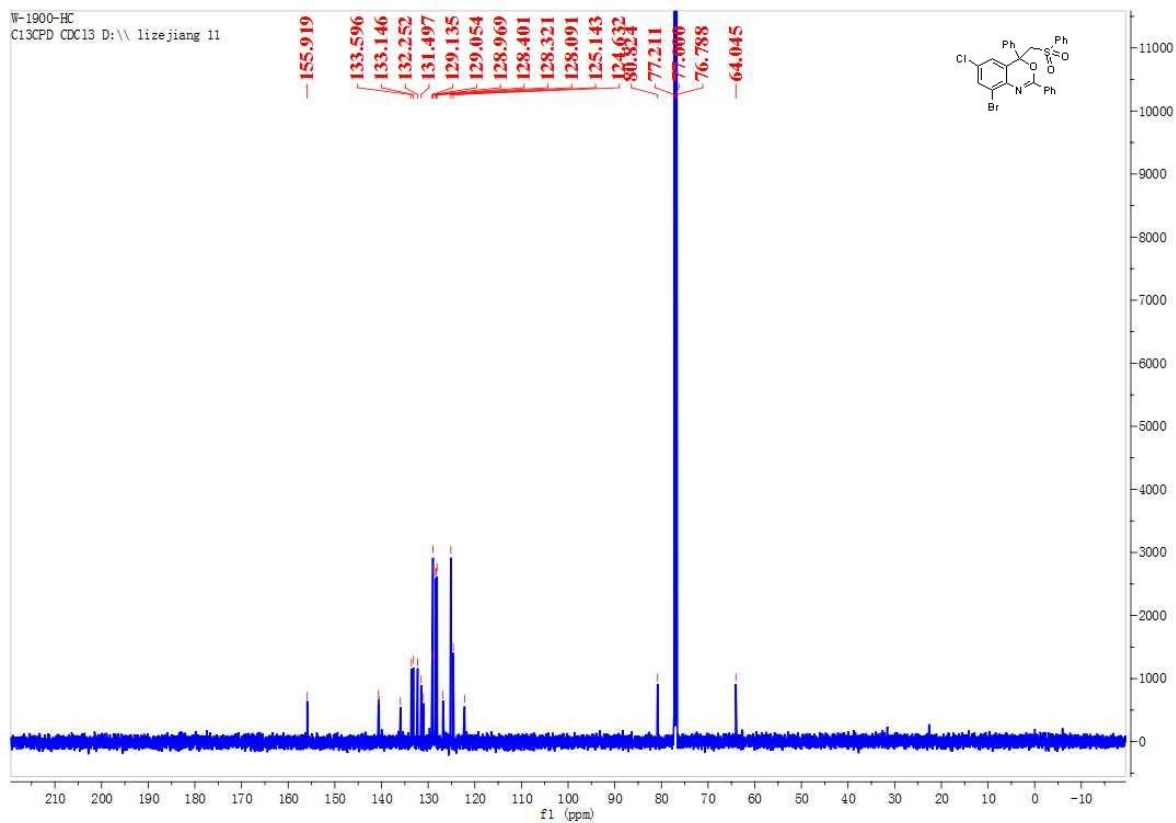

## 25-<sup>1</sup>H NMR

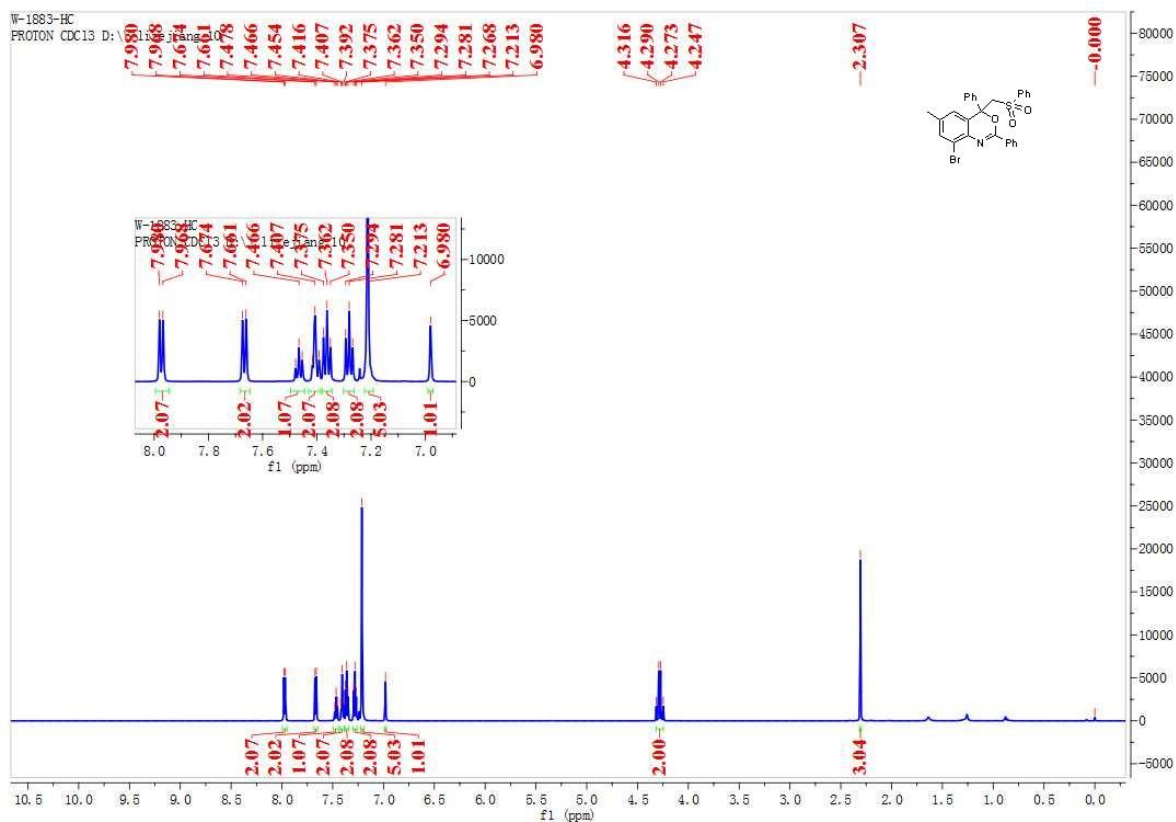

## 25-<sup>13</sup>C NMR

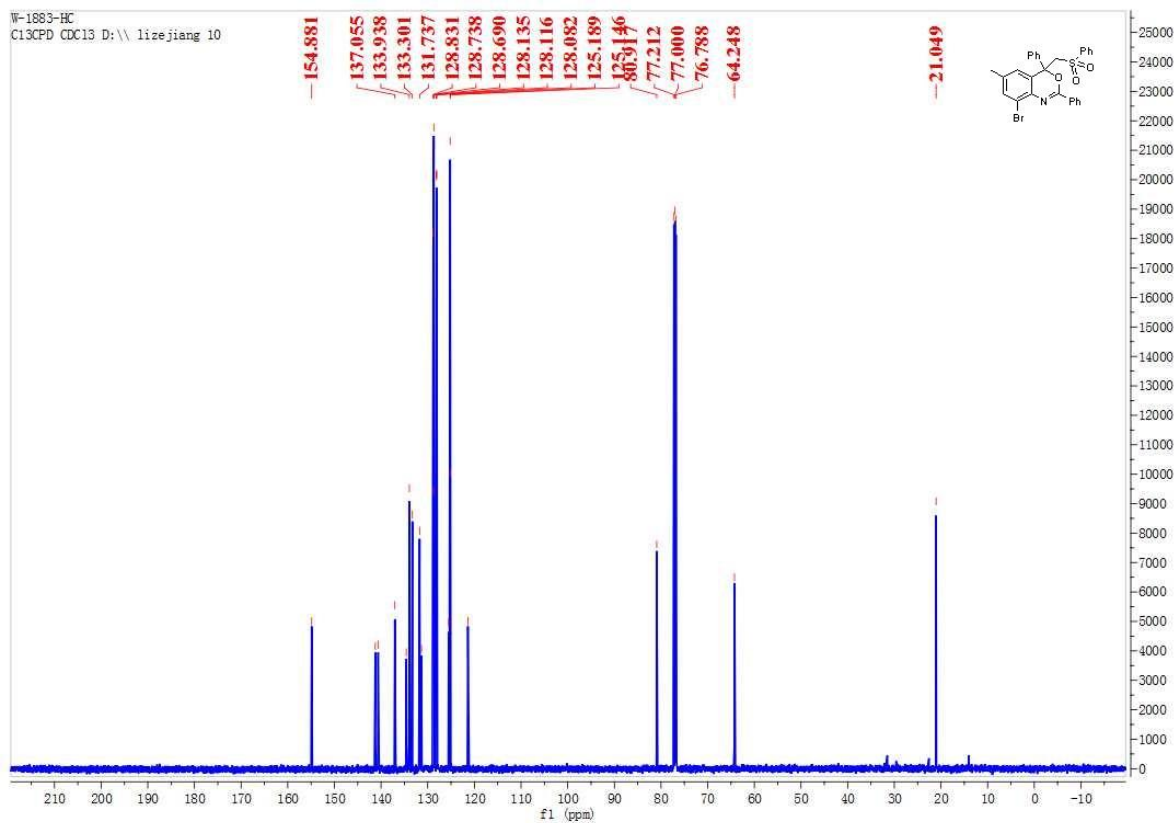



## 26-<sup>1</sup>H NMR

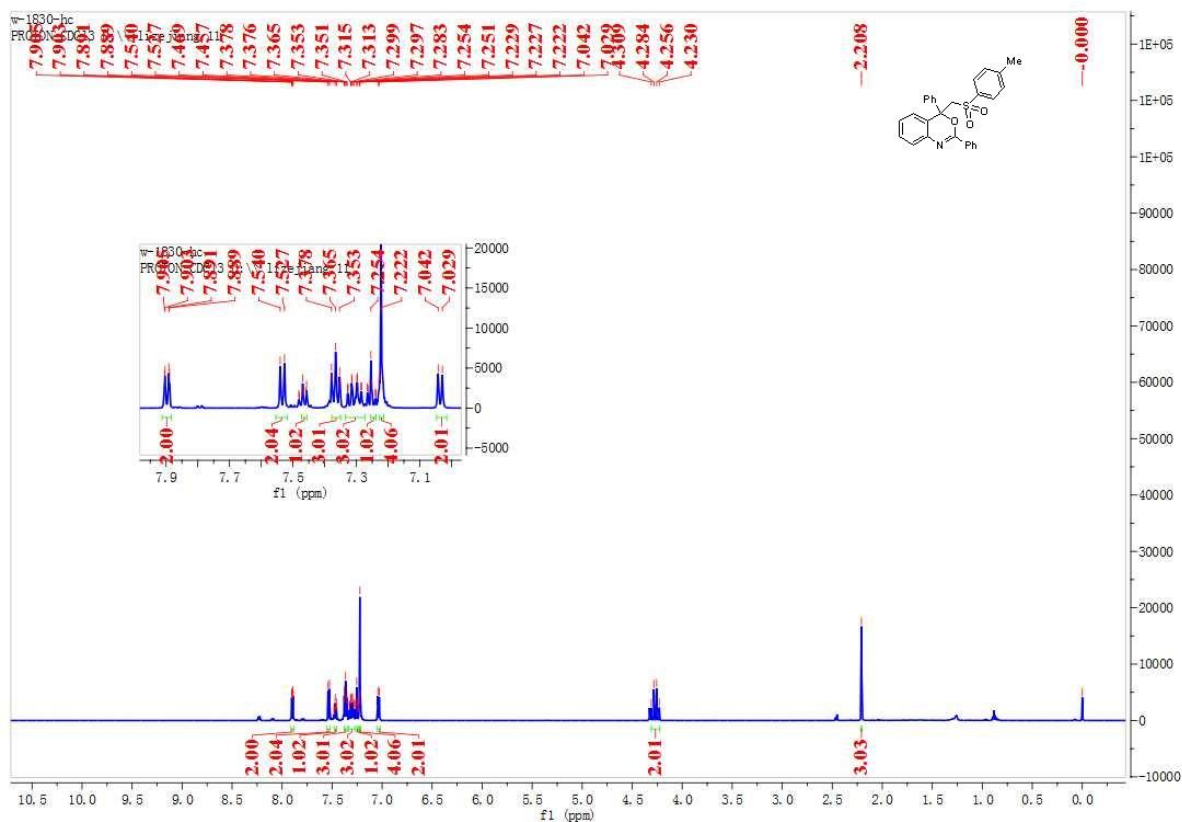

## 26-<sup>13</sup>C NMR

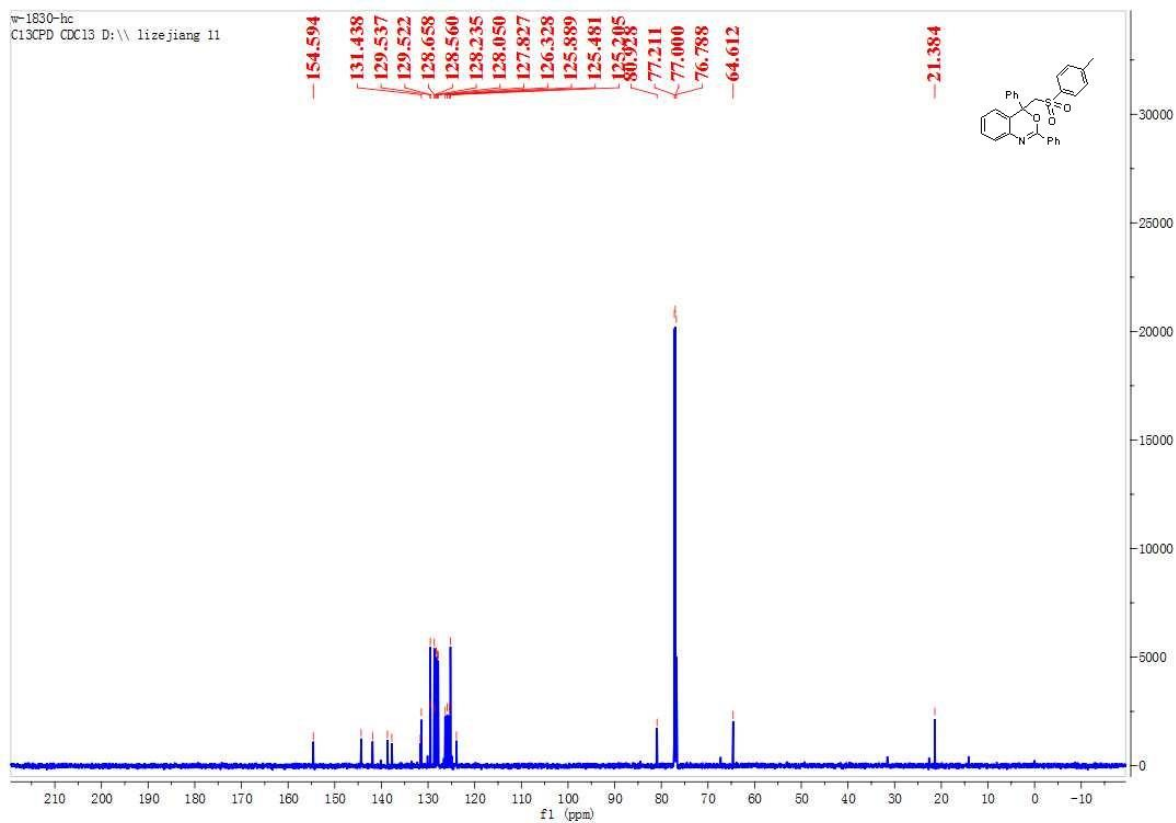

## 27-<sup>1</sup>H NMR

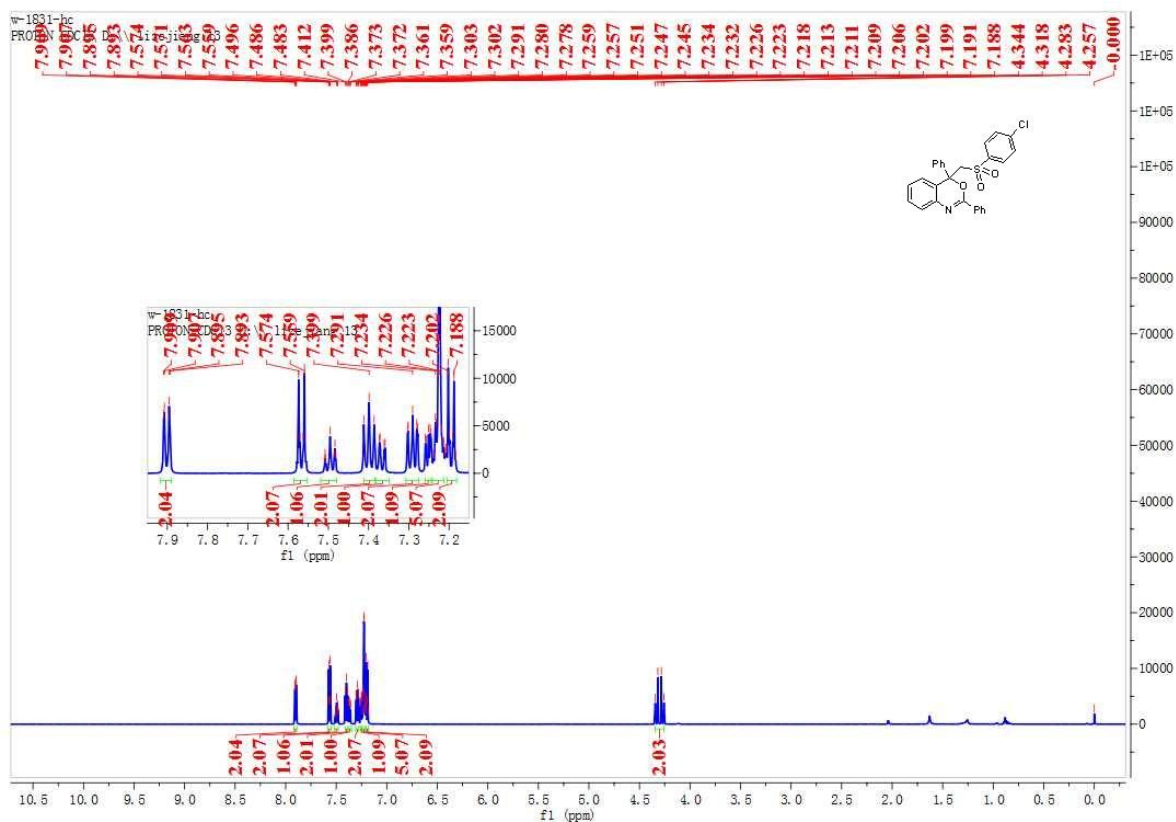

## 27-<sup>13</sup>C NMR

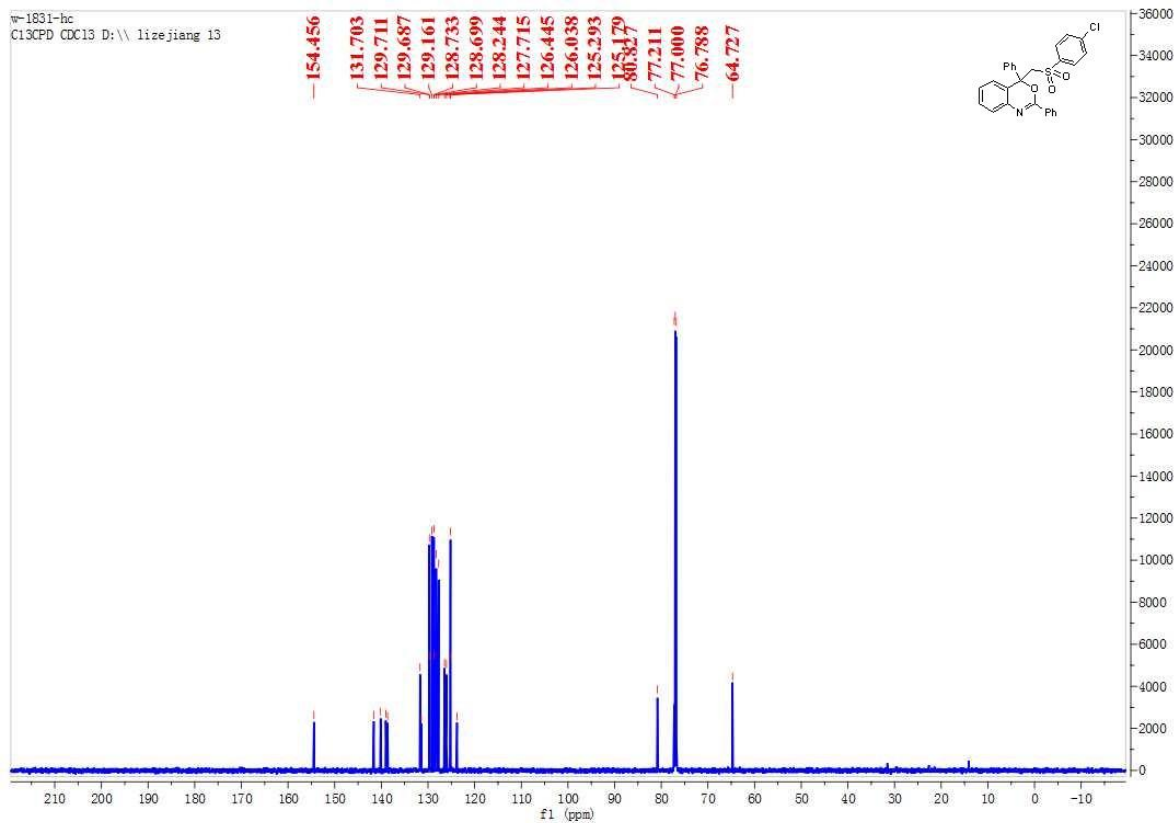

## 28-<sup>1</sup>H NMR

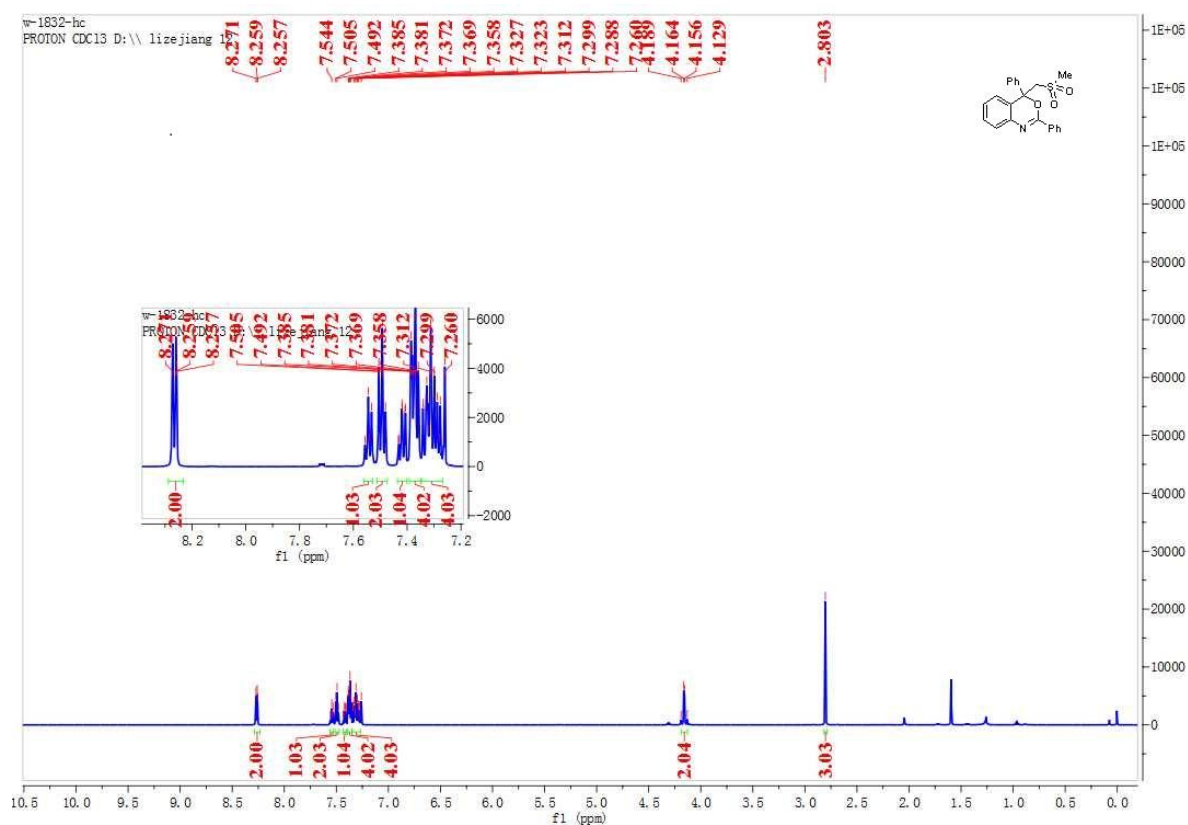

## 28-<sup>13</sup>C NMR

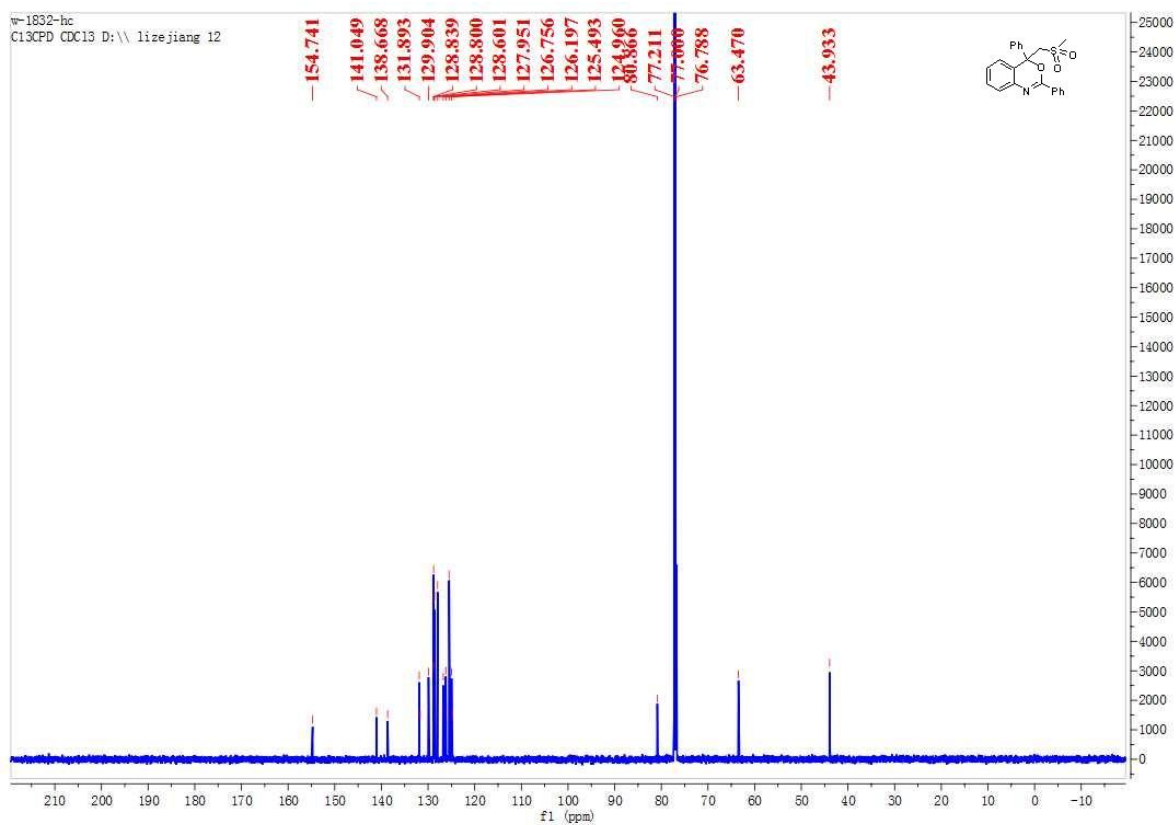

## 29-<sup>1</sup>H NMR

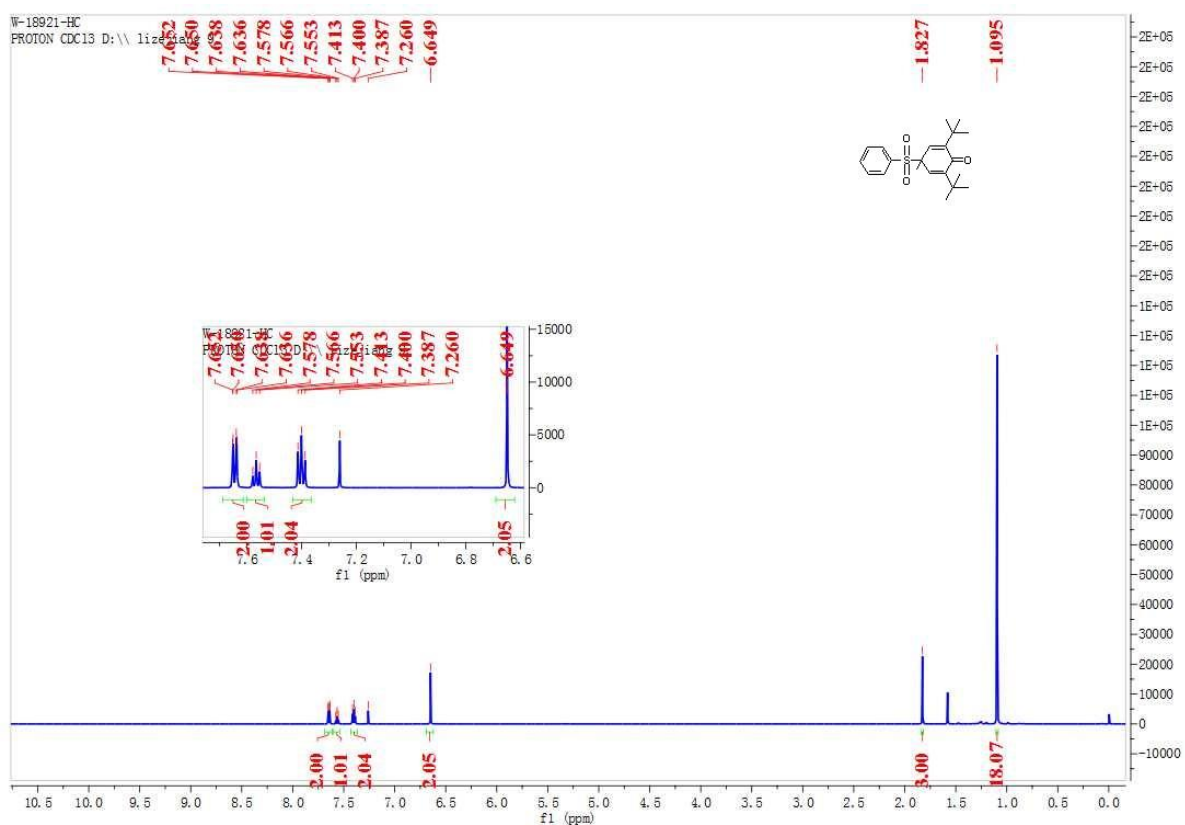

## 29-<sup>13</sup>C NMR

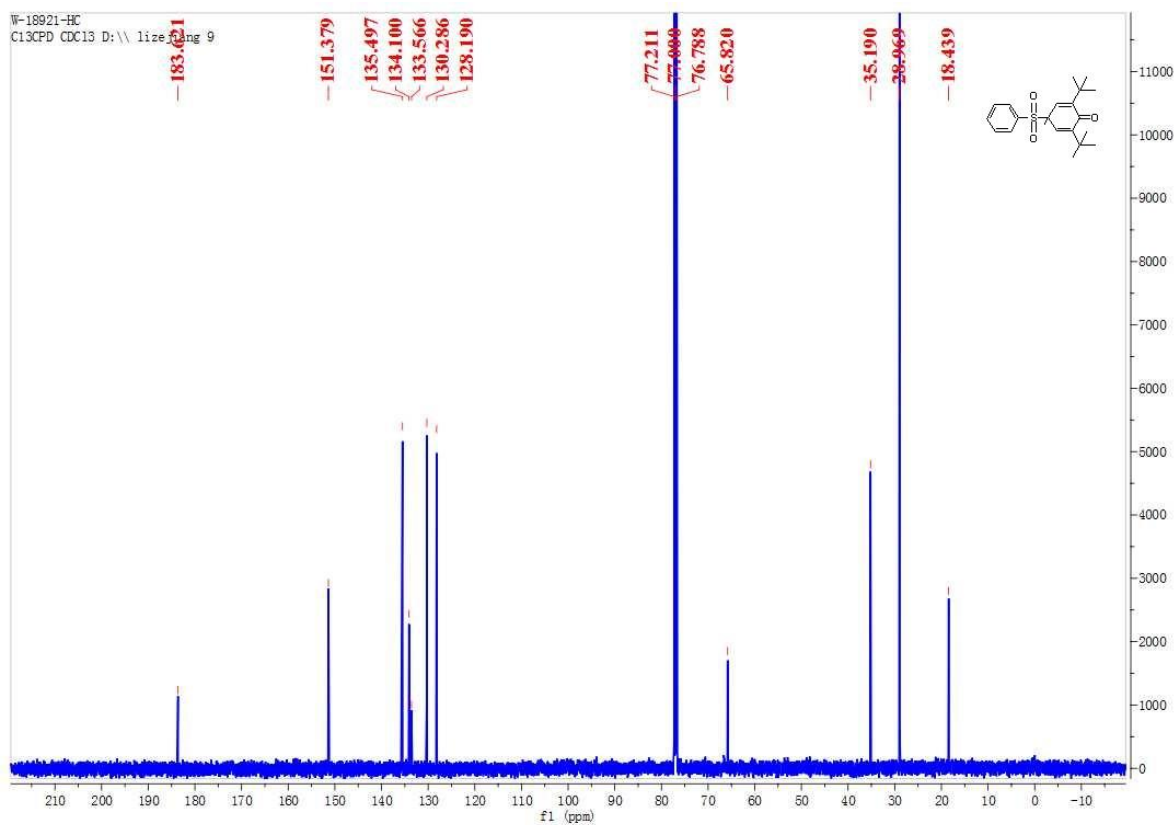

Supplement: c8ob02964d1.pdf [file c8ob02964d1.pdf]
